# Supplementary material for: Concomitant gain and loss of function pathomechanisms in C9ORF72 amyotrophic lateral sclerosis
Source: Life Sci Alliance. 2021 Feb 22;4(4):e202000764. doi: 10.26508/lsa.202000764 (PMC7918691; doi:10.26508/lsa.202000764)
Supplement: Supplementary file 5 [file LSA-2020-00764_TableS3.xlsx]

## Sheet: Sheet1
Supplemental table S3 - protein-protein interaction analysis of C9 vs C9-KO DEGs, with no additonal known interactors enabled
Number of nodes =493
Number of edges = 452
Average node degree = 1.83
Average local clustering coefficient = 0.273
PPI enrichment p-value = < 1.0e-16
#node1	node2	node1_string_id	node2_string_id	neighborhood_on_chromosome	gene_fusion	phylogenetic_cooccurrence	homology	coexpression	experimentally_determined_interaction	database_annotated	automated_textmining	combined_score
ACOX2	CAT	9606.ENSP00000307697	9606.ENSP00000241052	0.069	0	0	0	0.115	0.195	0.9	0.545	0.964
ACTA1	PFN1	9606.ENSP00000355645	9606.ENSP00000225655	0	0	0	0	0.055	0.968	0	0.387	0.98
ACTA1	LAMA4	9606.ENSP00000355645	9606.ENSP00000230538	0	0	0	0	0.061	0	0.9	0.087	0.906
ACTA1	ACTN4	9606.ENSP00000355645	9606.ENSP00000252699	0	0	0	0	0.087	0.381	0.9	0.378	0.96
ACTA1	LAMC1	9606.ENSP00000355645	9606.ENSP00000258341	0	0	0	0	0.061	0	0.9	0.044	0.902
ACTA1	KDR	9606.ENSP00000355645	9606.ENSP00000263923	0	0	0	0	0	0	0.9	0.265	0.923
ACTA1	FLT1	9606.ENSP00000355645	9606.ENSP00000282397	0	0	0	0	0	0	0.9	0.148	0.911
ACTA1	TLN1	9606.ENSP00000355645	9606.ENSP00000316029	0	0	0	0	0.051	0.379	0.9	0.223	0.948
ACTA1	MYO10	9606.ENSP00000355645	9606.ENSP00000421280	0	0	0	0	0.061	0.889	0	0.136	0.902
ACTA1	ACTN1	9606.ENSP00000355645	9606.ENSP00000377941	0	0	0	0	0.087	0.381	0.9	0.484	0.966
ACTA2	ITGB5	9606.ENSP00000402373	9606.ENSP00000296181	0	0	0	0	0.061	0.088	0.9	0.186	0.92
ACTA2	TLN1	9606.ENSP00000402373	9606.ENSP00000316029	0	0	0	0	0.061	0	0.9	0.211	0.919
ACTN1	SERPINE1	9606.ENSP00000377941	9606.ENSP00000223095	0	0	0	0	0.135	0	0.9	0.101	0.915
ACTN1	TGFB3	9606.ENSP00000377941	9606.ENSP00000238682	0	0	0	0	0	0.063	0.9	0.082	0.906
ACTN1	ACTN4	9606.ENSP00000377941	9606.ENSP00000252699	0	0	0	0.982	0.107	0.997	0.9	0.725	0.999
ACTN1	THBS1	9606.ENSP00000377941	9606.ENSP00000260356	0	0	0	0	0.098	0	0.9	0.186	0.92
ACTN1	TLN1	9606.ENSP00000377941	9606.ENSP00000316029	0	0	0	0	0.116	0.083	0.9	0.622	0.965
ACTN1	FN1	9606.ENSP00000377941	9606.ENSP00000346839	0	0	0	0	0.116	0	0.9	0.398	0.942
ACTN4	SERPINE1	9606.ENSP00000252699	9606.ENSP00000223095	0	0	0	0	0.085	0.379	0.9	0.154	0.945
ACTN4	TGFB3	9606.ENSP00000252699	9606.ENSP00000238682	0	0	0	0	0	0.063	0.9	0	0.902
ACTN4	THBS1	9606.ENSP00000252699	9606.ENSP00000260356	0	0	0	0	0.061	0	0.9	0.116	0.909
ACTN4	FN1	9606.ENSP00000252699	9606.ENSP00000346839	0	0	0	0	0.07	0.08	0.9	0.365	0.938
ACTN4	TLN1	9606.ENSP00000252699	9606.ENSP00000316029	0	0	0	0	0.16	0.083	0.9	0.529	0.958
ADAMTS1	THBS1	9606.ENSP00000284984	9606.ENSP00000260356	0	0	0	0.545	0.096	0	0.9	0.64	0.932
ADAMTS1	SEMA5B	9606.ENSP00000284984	9606.ENSP00000389588	0	0	0	0.543	0	0	0.9	0.089	0.902
ADAMTS1	ADAMTS15	9606.ENSP00000284984	9606.ENSP00000299164	0	0	0	0.938	0.088	0	0.9	0.718	0.909
ADAMTS1	THSD4	9606.ENSP00000284984	9606.ENSP00000347484	0	0	0	0.577	0.088	0	0.9	0.313	0.916
ADAMTS1	ADAMTS12	9606.ENSP00000284984	9606.ENSP00000422554	0	0	0	0.791	0.117	0	0.9	0.651	0.92
ADAMTS1	ADAMTS3	9606.ENSP00000284984	9606.ENSP00000286657	0	0	0	0.747	0.076	0	0.9	0.757	0.921
ADAMTS1	ADAMTSL1	9606.ENSP00000284984	9606.ENSP00000369921	0	0	0	0.601	0.127	0	0.9	0.641	0.931
ADAMTS12	THBS1	9606.ENSP00000422554	9606.ENSP00000260356	0	0	0	0.544	0.114	0	0.9	0.627	0.933
ADAMTS12	ADAMTS3	9606.ENSP00000422554	9606.ENSP00000286657	0	0	0	0.739	0.096	0	0.9	0.559	0.919
ADAMTS12	ADAMTS15	9606.ENSP00000422554	9606.ENSP00000299164	0	0	0	0.793	0.111	0	0.9	0.737	0.921
ADAMTS12	THSD4	9606.ENSP00000422554	9606.ENSP00000347484	0	0	0	0.623	0.073	0	0.9	0.437	0.918
ADAMTS12	ADAMTSL1	9606.ENSP00000422554	9606.ENSP00000369921	0	0	0	0.566	0.193	0	0.9	0.39	0.929
ADAMTS12	SEMA5B	9606.ENSP00000422554	9606.ENSP00000389588	0	0	0	0.541	0.063	0	0.9	0	0.902
ADAMTS15	THBS1	9606.ENSP00000299164	9606.ENSP00000260356	0	0	0	0.544	0.076	0	0.9	0.387	0.919
ADAMTS15	ADAMTS3	9606.ENSP00000299164	9606.ENSP00000286657	0	0	0	0.775	0.077	0	0.9	0.687	0.918
ADAMTS15	SEMA5B	9606.ENSP00000299164	9606.ENSP00000389588	0	0	0	0.544	0	0	0.9	0	0.9
ADAMTS15	THSD4	9606.ENSP00000299164	9606.ENSP00000347484	0	0	0	0.59	0.077	0	0.9	0.225	0.911
ADAMTS15	ADAMTSL1	9606.ENSP00000299164	9606.ENSP00000369921	0	0	0	0.597	0.117	0	0.9	0.403	0.921
ADAMTS3	THBS1	9606.ENSP00000286657	9606.ENSP00000260356	0	0	0	0.541	0.062	0	0.9	0.292	0.913
ADAMTS3	COL5A3	9606.ENSP00000286657	9606.ENSP00000264828	0	0	0	0	0.049	0.064	0.9	0.41	0.94
ADAMTS3	SEMA5B	9606.ENSP00000286657	9606.ENSP00000389588	0	0	0	0.54	0.065	0	0.9	0.047	0.902
ADAMTS3	THSD4	9606.ENSP00000286657	9606.ENSP00000347484	0	0	0	0.586	0	0	0.9	0.176	0.905
ADAMTS3	ADAMTSL1	9606.ENSP00000286657	9606.ENSP00000369921	0	0	0	0.589	0.076	0	0.9	0.239	0.911
ADAMTSL1	THBS1	9606.ENSP00000369921	9606.ENSP00000260356	0	0	0	0.541	0.088	0	0.9	0.342	0.918
ADAMTSL1	THSD4	9606.ENSP00000369921	9606.ENSP00000347484	0	0	0	0.618	0.087	0	0.9	0.554	0.924
ADAMTSL1	SEMA5B	9606.ENSP00000369921	9606.ENSP00000389588	0	0	0	0.539	0	0	0.9	0	0.9
AGPAT2	SNAP25	9606.ENSP00000360761	9606.ENSP00000254976	0	0	0	0	0	0	0.9	0	0.9
AGPAT2	ITGAV	9606.ENSP00000360761	9606.ENSP00000261023	0	0	0	0	0	0	0.9	0	0.9
AGPAT2	PLAUR	9606.ENSP00000360761	9606.ENSP00000339328	0	0	0	0	0.061	0	0.9	0	0.902
AGPAT2	CD47	9606.ENSP00000360761	9606.ENSP00000355361	0	0	0	0	0	0	0.9	0	0.9
AGPAT2	TMEM63A	9606.ENSP00000360761	9606.ENSP00000355800	0	0	0	0	0.061	0	0.9	0	0.902
AGPAT2	TNFRSF1B	9606.ENSP00000360761	9606.ENSP00000365435	0	0	0	0	0.062	0	0.9	0	0.902
AGTRAP	ZC3HAV1	9606.ENSP00000319713	9606.ENSP00000242351	0	0	0	0	0	0	0.9	0	0.9
AGTRAP	MAP2K1	9606.ENSP00000319713	9606.ENSP00000302486	0	0	0	0	0	0	0.9	0.046	0.9
AGTRAP	TLN1	9606.ENSP00000319713	9606.ENSP00000316029	0	0	0	0	0	0	0.9	0	0.9
AGTRAP	FN1	9606.ENSP00000319713	9606.ENSP00000346839	0	0	0	0	0	0	0.9	0.07	0.903
AGTRAP	LMNA	9606.ENSP00000319713	9606.ENSP00000357283	0	0	0	0	0	0.043	0.9	0.09	0.905
ATF3	FOS	9606.ENSP00000344352	9606.ENSP00000306245	0	0	0	0.764	0.854	0.502	0	0.797	0.938
AXL	KDR	9606.ENSP00000301178	9606.ENSP00000263923	0	0	0	0.602	0.061	0.096	0.9	0.587	0.928
BLM	CLSPN	9606.ENSP00000347232	9606.ENSP00000312995	0	0	0	0	0.268	0	0.9	0.24	0.939
BLM	HIST1H2BK	9606.ENSP00000347232	9606.ENSP00000349430	0	0	0	0	0	0.081	0.9	0	0.904
BLM	POLH	9606.ENSP00000347232	9606.ENSP00000361310	0.052	0	0	0	0.124	0	0.9	0.249	0.929
BLM	H2AFX	9606.ENSP00000347232	9606.ENSP00000434024	0	0	0	0	0.114	0.481	0.9	0.47	0.972
BLM	TIMELESS	9606.ENSP00000347232	9606.ENSP00000450607	0	0	0	0	0.294	0.302	0.9	0.616	0.978
BLM	EME1	9606.ENSP00000347232	9606.ENSP00000376952	0	0	0	0	0.203	0.33	0.9	0.778	0.986
BMP1	COL5A3	9606.ENSP00000305714	9606.ENSP00000264828	0	0	0	0	0.095	0.064	0.9	0.151	0.918
BMP1	HSPG2	9606.ENSP00000305714	9606.ENSP00000363827	0	0	0	0	0.154	0.379	0.9	0.44	0.966
CASP7	CLSPN	9606.ENSP00000358327	9606.ENSP00000312995	0	0	0	0	0.061	0.379	0.9	0.172	0.945
CASP7	VIM	9606.ENSP00000358327	9606.ENSP00000446007	0	0	0	0	0.061	0.364	0.9	0.062	0.936
CAV1	TNFRSF1A	9606.ENSP00000339191	9606.ENSP00000162749	0	0	0	0	0.11	0.348	0.9	0.253	0.95
CAV1	TGFB3	9606.ENSP00000339191	9606.ENSP00000238682	0	0	0	0	0.062	0	0.9	0.119	0.91
CAV1	TFAP2B	9606.ENSP00000339191	9606.ENSP00000377265	0	0	0	0	0.062	0	0.9	0	0.902
CAV1	TGFBR2	9606.ENSP00000339191	9606.ENSP00000351905	0	0	0	0	0.125	0.057	0.9	0.291	0.933
CD44	MMP2	9606.ENSP00000398632	9606.ENSP00000219070	0	0	0	0	0.068	0	0.9	0.642	0.963
CD44	TRIM22	9606.ENSP00000398632	9606.ENSP00000369299	0	0	0	0	0	0	0.9	0	0.9
CD44	TRIM6	9606.ENSP00000398632	9606.ENSP00000369440	0	0	0	0	0	0	0.9	0	0.9
CD44	SPP1	9606.ENSP00000398632	9606.ENSP00000378517	0	0	0	0	0.062	0.379	0.9	0.892	0.992
CD47	SNAP25	9606.ENSP00000355361	9606.ENSP00000254976	0	0	0	0	0.061	0	0.9	0.059	0.903
CD47	THBS1	9606.ENSP00000355361	9606.ENSP00000260356	0	0	0	0	0	0.379	0.9	0.89	0.992
CD47	ITGAV	9606.ENSP00000355361	9606.ENSP00000261023	0	0	0	0	0.061	0.379	0.9	0.438	0.962
CD47	PLAUR	9606.ENSP00000355361	9606.ENSP00000339328	0	0	0	0	0	0	0.9	0.268	0.923
CD47	TMEM63A	9606.ENSP00000355361	9606.ENSP00000355800	0	0	0	0	0	0	0.9	0	0.9
CD47	TNFRSF1B	9606.ENSP00000355361	9606.ENSP00000365435	0	0	0	0	0.061	0	0.9	0.14	0.912
CDC20	MCM6	9606.ENSP00000361540	9606.ENSP00000264156	0	0	0	0	0.907	0.127	0	0.568	0.961
CDC20	CENPU	9606.ENSP00000361540	9606.ENSP00000281453	0	0	0	0	0.551	0	0.9	0.312	0.966
CDC20	PLK1	9606.ENSP00000361540	9606.ENSP00000300093	0	0	0	0	0.981	0.994	0.9	0.912	0.999
CDC20	TRIM4	9606.ENSP00000361540	9606.ENSP00000348216	0	0	0	0	0.061	0	0.9	0	0.902
CDC20	SGOL2	9606.ENSP00000361540	9606.ENSP00000350447	0	0	0	0	0.441	0	0.9	0.427	0.965
CDC20	KIF2C	9606.ENSP00000361540	9606.ENSP00000361298	0	0	0	0	0.958	0.078	0.9	0.579	0.998
CDC20	RNF182	9606.ENSP00000361540	9606.ENSP00000420465	0	0	0	0	0.061	0	0.9	0	0.902
CDC20	RACGAP1	9606.ENSP00000361540	9606.ENSP00000404190	0	0	0	0	0.882	0	0	0.348	0.92
CDC20	NUP37	9606.ENSP00000361540	9606.ENSP00000448054	0	0	0	0	0.214	0	0.9	0.092	0.922
CDC20	CDC45	9606.ENSP00000361540	9606.ENSP00000405726	0	0	0	0	0.858	0.05	0	0.538	0.932
CDC20	KIF4A	9606.ENSP00000361540	9606.ENSP00000363524	0	0	0	0	0.937	0.078	0	0.417	0.963
CDC20	CENPI	9606.ENSP00000361540	9606.ENSP00000362018	0	0	0	0	0.518	0	0.9	0.355	0.966
CDC20	PBK	9606.ENSP00000361540	9606.ENSP00000428489	0	0	0	0	0.964	0.082	0	0.327	0.976
CDC20	CKS2	9606.ENSP00000361540	9606.ENSP00000364976	0	0	0	0	0.909	0.772	0	0.618	0.991
CDC20	CDCA8	9606.ENSP00000361540	9606.ENSP00000362146	0	0	0	0	0.988	0	0.9	0.599	0.999
CDC45	MCM6	9606.ENSP00000405726	9606.ENSP00000264156	0	0	0	0	0.895	0.977	0.9	0.885	0.999
CDC45	GINS4	9606.ENSP00000405726	9606.ENSP00000276533	0	0	0	0	0.327	0.836	0.9	0.935	0.999
CDC45	CLSPN	9606.ENSP00000405726	9606.ENSP00000312995	0	0	0	0	0.486	0.379	0.9	0.735	0.99
CDC45	E2F1	9606.ENSP00000405726	9606.ENSP00000345571	0	0	0	0	0.568	0	0.9	0.298	0.967
CDC45	GINS3	9606.ENSP00000405726	9606.ENSP00000401018	0	0	0	0	0.435	0.782	0.9	0.948	0.999
CDC45	TIMELESS	9606.ENSP00000405726	9606.ENSP00000450607	0	0	0	0	0.772	0.361	0	0.78	0.965
CDCA2	PBK	9606.ENSP00000328228	9606.ENSP00000428489	0	0	0	0	0.871	0	0	0.314	0.907
CDCA8	CENPU	9606.ENSP00000362146	9606.ENSP00000281453	0	0	0	0	0.573	0	0.9	0.223	0.963
CDCA8	PLK1	9606.ENSP00000362146	9606.ENSP00000300093	0	0	0	0	0.956	0	0.9	0.599	0.998
CDCA8	SGOL2	9606.ENSP00000362146	9606.ENSP00000350447	0	0	0	0	0.547	0.313	0.9	0.451	0.98
CDCA8	KIF2C	9606.ENSP00000362146	9606.ENSP00000361298	0	0	0	0	0.931	0.114	0.9	0.658	0.997
CDCA8	CENPI	9606.ENSP00000362146	9606.ENSP00000362018	0	0	0	0	0.491	0	0.9	0.352	0.964
CDCA8	NUP37	9606.ENSP00000362146	9606.ENSP00000448054	0	0	0	0	0.179	0	0.9	0.199	0.928
CDCA8	E2F8	9606.ENSP00000362146	9606.ENSP00000481103	0	0	0	0	0.869	0	0	0.5	0.932
CDCA8	KIF4A	9606.ENSP00000362146	9606.ENSP00000363524	0	0	0	0	0.889	0	0	0.486	0.94
CDCA8	PBK	9606.ENSP00000362146	9606.ENSP00000428489	0	0	0	0	0.915	0	0	0.33	0.941
CDCA8	RACGAP1	9606.ENSP00000362146	9606.ENSP00000404190	0	0	0	0	0.812	0	0.9	0.524	0.99
CDH2	EVA1A	9606.ENSP00000269141	9606.ENSP00000233712	0	0	0	0	0.076	0	0.9	0	0.903
CDH2	IGFBP5	9606.ENSP00000269141	9606.ENSP00000233813	0	0	0	0	0.098	0	0.9	0.183	0.919
CDH2	LAMC1	9606.ENSP00000269141	9606.ENSP00000258341	0	0	0	0	0.076	0	0.9	0.187	0.918
CDH2	CDH6	9606.ENSP00000269141	9606.ENSP00000265071	0	0	0	0.826	0.077	0	0.9	0.587	0.913
CDH2	TNC	9606.ENSP00000269141	9606.ENSP00000265131	0	0	0	0	0.097	0	0.9	0.211	0.922
CDH2	MFGE8	9606.ENSP00000269141	9606.ENSP00000268150	0	0	0	0	0.065	0	0.9	0.111	0.909
CDH2	CHGB	9606.ENSP00000269141	9606.ENSP00000368244	0	0	0	0	0.061	0	0.9	0.073	0.905
CDH2	SPARCL1	9606.ENSP00000269141	9606.ENSP00000414856	0	0	0	0	0.061	0	0.9	0.113	0.909
CDH2	CDH4	9606.ENSP00000269141	9606.ENSP00000484928	0	0	0	0.972	0.076	0.379	0.9	0.793	0.938
CDH2	SPP1	9606.ENSP00000269141	9606.ENSP00000378517	0	0	0	0	0.065	0	0.9	0.48	0.947
CDH2	FN1	9606.ENSP00000269141	9606.ENSP00000346839	0	0	0	0	0.144	0	0.9	0.804	0.981
CDH4	CDH6	9606.ENSP00000484928	9606.ENSP00000265071	0	0	0	0.826	0	0	0.9	0.678	0.911
CDK6	RUNX1	9606.ENSP00000265734	9606.ENSP00000300305	0	0	0	0	0.061	0.537	0.9	0.252	0.963
CDK6	E2F1	9606.ENSP00000265734	9606.ENSP00000345571	0	0	0	0	0.063	0.168	0.9	0.699	0.973
CDK6	CDKN1A	9606.ENSP00000265734	9606.ENSP00000384849	0	0	0	0	0.051	0.879	0.9	0.754	0.996
CDKN1A	E2F1	9606.ENSP00000384849	9606.ENSP00000345571	0	0	0	0	0.052	0.435	0.9	0.617	0.976
CDKN1A	TFAP2A	9606.ENSP00000384849	9606.ENSP00000368924	0	0	0	0	0	0	0.9	0.218	0.918
CDKN1A	RUNX3	9606.ENSP00000384849	9606.ENSP00000382800	0	0	0	0	0	0	0.9	0.336	0.93
CENPI	CENPU	9606.ENSP00000362018	9606.ENSP00000281453	0	0	0	0	0.221	0.826	0.9	0.837	0.997
CENPI	PLK1	9606.ENSP00000362018	9606.ENSP00000300093	0	0	0	0	0.413	0	0.9	0.393	0.961
CENPI	HIST1H2BK	9606.ENSP00000362018	9606.ENSP00000349430	0	0	0	0	0	0	0.9	0	0.9
CENPI	SGOL2	9606.ENSP00000362018	9606.ENSP00000350447	0	0	0	0	0.451	0	0.9	0.162	0.95
CENPI	KIF2C	9606.ENSP00000362018	9606.ENSP00000361298	0	0	0	0	0.269	0	0.9	0.416	0.953
CENPI	NUP37	9606.ENSP00000362018	9606.ENSP00000448054	0	0	0	0	0.098	0	0.9	0	0.905
CENPI	H2AFX	9606.ENSP00000362018	9606.ENSP00000434024	0	0	0	0	0.076	0.131	0.9	0	0.912
CENPU	HIST1H2BK	9606.ENSP00000281453	9606.ENSP00000349430	0	0	0	0	0.069	0	0.9	0	0.902
CENPU	H2AFX	9606.ENSP00000281453	9606.ENSP00000434024	0	0	0	0	0.163	0	0.9	0.041	0.912
CENPU	NUP37	9606.ENSP00000281453	9606.ENSP00000448054	0	0	0	0	0.259	0	0.9	0	0.922
CENPU	SGOL2	9606.ENSP00000281453	9606.ENSP00000350447	0	0	0	0	0.283	0	0.9	0.143	0.933
CENPU	KIF2C	9606.ENSP00000281453	9606.ENSP00000361298	0	0	0	0	0.682	0	0.9	0.348	0.977
CENPU	PLK1	9606.ENSP00000281453	9606.ENSP00000300093	0	0	0	0	0.26	0.328	0.9	0.835	0.99
CHGB	EVA1A	9606.ENSP00000368244	9606.ENSP00000233712	0	0	0	0	0	0	0.9	0	0.9
CHGB	IGFBP5	9606.ENSP00000368244	9606.ENSP00000233813	0	0	0	0	0.061	0	0.9	0.07	0.905
CHGB	LAMC1	9606.ENSP00000368244	9606.ENSP00000258341	0	0	0	0	0	0	0.9	0.102	0.906
CHGB	TNC	9606.ENSP00000368244	9606.ENSP00000265131	0	0	0	0	0.05	0	0.9	0.05	0.901
CHGB	MFGE8	9606.ENSP00000368244	9606.ENSP00000268150	0	0	0	0	0	0	0.9	0.254	0.922
CHGB	FN1	9606.ENSP00000368244	9606.ENSP00000346839	0	0	0	0	0	0	0.9	0.214	0.918
CHGB	SPP1	9606.ENSP00000368244	9606.ENSP00000378517	0	0	0	0	0	0	0.9	0.128	0.909
CHGB	SPARCL1	9606.ENSP00000368244	9606.ENSP00000414856	0	0	0	0	0.153	0	0.9	0.112	0.918
CHRM2	MCHR1	9606.ENSP00000399745	9606.ENSP00000249016	0	0	0	0.568	0.061	0	0.9	0.106	0.904
CHRM2	GAL	9606.ENSP00000399745	9606.ENSP00000265643	0	0	0	0	0	0	0.9	0.097	0.905
CHRM2	CXCL5	9606.ENSP00000399745	9606.ENSP00000296027	0	0	0	0	0	0	0.9	0.079	0.903
CHRM2	S1PR1	9606.ENSP00000399745	9606.ENSP00000305416	0	0	0	0.565	0	0	0.9	0.348	0.913
CHRM2	TRIP10	9606.ENSP00000399745	9606.ENSP00000320117	0	0	0	0	0	0	0.9	0	0.9
CHRM2	SYNJ2	9606.ENSP00000399745	9606.ENSP00000347792	0	0	0	0	0	0	0.9	0	0.9
CHRM2	CXCL1	9606.ENSP00000399745	9606.ENSP00000379110	0	0	0	0	0	0	0.9	0.046	0.9
CLSPN	USP28	9606.ENSP00000312995	9606.ENSP00000003302	0	0	0	0	0.061	0.379	0.9	0.643	0.976
CLSPN	MCM6	9606.ENSP00000312995	9606.ENSP00000264156	0	0	0	0	0.39	0	0.9	0.361	0.957
CLSPN	PLK1	9606.ENSP00000312995	9606.ENSP00000300093	0	0	0	0	0.411	0.379	0.9	0.877	0.994
CLSPN	TIMELESS	9606.ENSP00000312995	9606.ENSP00000450607	0	0	0	0	0.295	0.463	0.9	0.753	0.989
CNN2	QPCT	9606.ENSP00000263097	9606.ENSP00000344829	0	0	0	0	0.059	0	0.9	0	0.901
CNN2	CXCL1	9606.ENSP00000263097	9606.ENSP00000379110	0	0	0	0	0.061	0	0.9	0	0.902
COL12A1	COL8A1	9606.ENSP00000325146	9606.ENSP00000261037	0	0	0	0.713	0.156	0	0.9	0.64	0.927
COL12A1	COL5A3	9606.ENSP00000325146	9606.ENSP00000264828	0	0	0	0.548	0.128	0	0.9	0.439	0.926
COL12A1	COL22A1	9606.ENSP00000325146	9606.ENSP00000303153	0	0	0	0.628	0.046	0.063	0.9	0.806	0.931
COL12A1	LEPREL1	9606.ENSP00000325146	9606.ENSP00000316881	0	0	0	0	0.049	0	0.9	0.092	0.906
COL12A1	COL25A1	9606.ENSP00000325146	9606.ENSP00000382083	0	0	0	0.72	0.076	0	0.9	0.379	0.913
COL22A1	COL8A1	9606.ENSP00000303153	9606.ENSP00000261037	0	0	0.289	0.731	0.061	0	0.9	0.252	0.914
COL22A1	COL5A3	9606.ENSP00000303153	9606.ENSP00000264828	0	0	0.314	0.691	0.076	0.063	0.9	0.261	0.92
COL22A1	LEPREL1	9606.ENSP00000303153	9606.ENSP00000316881	0	0	0	0	0	0	0.9	0.092	0.905
COL22A1	COL25A1	9606.ENSP00000303153	9606.ENSP00000382083	0	0	0.206	0.72	0.061	0.063	0.9	0.041	0.908
COL25A1	COL8A1	9606.ENSP00000382083	9606.ENSP00000261037	0	0	0.401	0.684	0	0	0.9	0.242	0.917
COL25A1	COL5A3	9606.ENSP00000382083	9606.ENSP00000264828	0	0	0.347	0.738	0	0	0.9	0.194	0.912
COL25A1	LEPREL1	9606.ENSP00000382083	9606.ENSP00000316881	0	0	0	0	0	0	0.9	0	0.9
COL5A3	COL8A1	9606.ENSP00000264828	9606.ENSP00000261037	0	0	0.431	0.715	0.062	0	0.9	0.541	0.926
COL5A3	LEPREL1	9606.ENSP00000264828	9606.ENSP00000316881	0	0	0	0	0.061	0	0.9	0.042	0.902
COL5A3	LUM	9606.ENSP00000264828	9606.ENSP00000266718	0	0	0	0	0.141	0.082	0.9	0.087	0.918
COL8A1	LEPREL1	9606.ENSP00000261037	9606.ENSP00000316881	0	0	0	0	0	0	0.9	0	0.9
CRYZ	FOS	9606.ENSP00000399805	9606.ENSP00000306245	0	0	0	0	0.049	0	0.9	0.25	0.922
CSPG4	DSEL	9606.ENSP00000312506	9606.ENSP00000310565	0	0	0	0	0.061	0	0.9	0.116	0.909
CSPG4	UST	9606.ENSP00000312506	9606.ENSP00000356433	0	0	0	0	0.061	0	0.9	0.089	0.907
CSPG4	HSPG2	9606.ENSP00000312506	9606.ENSP00000363827	0	0	0	0	0.221	0	0.9	0.625	0.968
CXCL1	MCHR1	9606.ENSP00000379110	9606.ENSP00000249016	0	0	0	0	0	0	0.9	0	0.9
CXCL1	GAL	9606.ENSP00000379110	9606.ENSP00000265643	0	0	0	0	0	0	0.9	0.156	0.912
CXCL1	CXCL5	9606.ENSP00000379110	9606.ENSP00000296027	0	0	0	0.907	0.397	0.667	0.9	0.887	0.979
CXCL1	S1PR1	9606.ENSP00000379110	9606.ENSP00000305416	0	0	0	0	0	0	0.9	0.146	0.91
CXCL1	QPCT	9606.ENSP00000379110	9606.ENSP00000344829	0	0	0	0	0.076	0	0.9	0.074	0.906
CXCL5	MCHR1	9606.ENSP00000296027	9606.ENSP00000249016	0	0	0	0	0	0	0.9	0	0.9
CXCL5	GAL	9606.ENSP00000296027	9606.ENSP00000265643	0	0	0	0	0	0	0.9	0.041	0.9
CXCL5	S1PR1	9606.ENSP00000296027	9606.ENSP00000305416	0	0	0	0	0	0	0.9	0.105	0.906
DNMT3B	EZH2	9606.ENSP00000328547	9606.ENSP00000320147	0	0	0	0	0.152	0.434	0.9	0.83	0.99
DNMT3B	HIST1H2BK	9606.ENSP00000328547	9606.ENSP00000349430	0	0	0	0	0	0.185	0.9	0.05	0.915
DNMT3B	PHF19	9606.ENSP00000328547	9606.ENSP00000483946	0	0	0	0	0.092	0	0.9	0.16	0.917
DNMT3B	H2AFX	9606.ENSP00000328547	9606.ENSP00000434024	0	0	0	0	0.111	0.284	0.9	0.292	0.948
DOCK1	NTN1	9606.ENSP00000280333	9606.ENSP00000173229	0	0	0	0	0.063	0	0.9	0.396	0.938
DOCK1	KDR	9606.ENSP00000280333	9606.ENSP00000263923	0	0	0	0	0.088	0.157	0.9	0.132	0.924
E2F1	EZH2	9606.ENSP00000345571	9606.ENSP00000320147	0	0	0	0	0.17	0.081	0.9	0.4	0.948
E2F1	E2F7	9606.ENSP00000345571	9606.ENSP00000323246	0	0	0	0.564	0.229	0.32	0.9	0.561	0.956
E2F1	E2F8	9606.ENSP00000345571	9606.ENSP00000481103	0	0	0	0.57	0.197	0.32	0.9	0.559	0.954
E2F7	E2F8	9606.ENSP00000323246	9606.ENSP00000481103	0	0	0	0.774	0.231	0.379	0.9	0.883	0.958
ECE1	EDN1	9606.ENSP00000364028	9606.ENSP00000368683	0	0	0	0	0.065	0.379	0.9	0.904	0.993
EDN1	UTS2	9606.ENSP00000368683	9606.ENSP00000054668	0	0	0	0	0	0	0.9	0.598	0.958
EDN1	MMP2	9606.ENSP00000368683	9606.ENSP00000219070	0	0	0	0	0.061	0	0.8	0.738	0.946
EDN1	MCHR1	9606.ENSP00000368683	9606.ENSP00000249016	0	0	0	0	0	0.157	0.9	0	0.912
EDN1	SLC9A3R1	9606.ENSP00000368683	9606.ENSP00000262613	0	0	0	0	0	0	0.9	0.104	0.906
EDN1	MAP2K1	9606.ENSP00000368683	9606.ENSP00000302486	0	0	0	0	0	0	0.9	0.452	0.942
EDN1	EDNRB	9606.ENSP00000368683	9606.ENSP00000366416	0	0	0	0	0	0.951	0.9	0.964	0.999
EDN1	LPAR4	9606.ENSP00000368683	9606.ENSP00000408205	0	0	0	0	0	0	0.9	0.124	0.908
EDN1	PLCB3	9606.ENSP00000368683	9606.ENSP00000443631	0	0	0	0	0	0	0.9	0.248	0.921
EDN1	HTR2A	9606.ENSP00000368683	9606.ENSP00000437737	0	0	0	0	0	0.157	0.9	0.261	0.932
EDNRB	UTS2	9606.ENSP00000366416	9606.ENSP00000054668	0	0	0	0	0	0	0.9	0.056	0.901
EDNRB	MCHR1	9606.ENSP00000366416	9606.ENSP00000249016	0	0	0	0.624	0.076	0	0.9	0	0.903
EDNRB	LPAR4	9606.ENSP00000366416	9606.ENSP00000408205	0	0	0	0.607	0	0	0.9	0.117	0.903
EDNRB	HTR2A	9606.ENSP00000366416	9606.ENSP00000437737	0	0	0	0.563	0	0	0.9	0.223	0.908
EDNRB	PLCB3	9606.ENSP00000366416	9606.ENSP00000443631	0	0	0	0	0	0.062	0.9	0.108	0.909
EFNB2	MMP2	9606.ENSP00000245323	9606.ENSP00000219070	0	0	0	0	0.065	0	0.9	0.284	0.927
EFNB2	MAP2K1	9606.ENSP00000245323	9606.ENSP00000302486	0	0	0	0	0	0	0.9	0.142	0.91
EGR1	IFI35	9606.ENSP00000239938	9606.ENSP00000395590	0	0	0	0	0	0	0.9	0.087	0.904
EGR1	MX1	9606.ENSP00000239938	9606.ENSP00000381601	0	0	0	0	0.063	0.056	0.9	0.19	0.918
EGR1	FOSB	9606.ENSP00000239938	9606.ENSP00000245919	0	0	0	0	0.754	0.073	0	0.758	0.94
EGR1	EZH2	9606.ENSP00000239938	9606.ENSP00000320147	0	0	0	0	0.051	0.233	0.9	0.377	0.948
EGR1	NFATC2	9606.ENSP00000239938	9606.ENSP00000379330	0	0	0	0	0	0.294	0.9	0.408	0.954
EGR1	FOS	9606.ENSP00000239938	9606.ENSP00000306245	0	0	0	0	0.961	0.073	0	0.913	0.996
EVA1A	SPP1	9606.ENSP00000233712	9606.ENSP00000378517	0	0	0	0	0	0	0.9	0	0.9
EVA1A	MFGE8	9606.ENSP00000233712	9606.ENSP00000268150	0	0	0	0	0.069	0	0.9	0	0.902
EVA1A	SPARCL1	9606.ENSP00000233712	9606.ENSP00000414856	0	0	0	0	0.061	0	0.9	0	0.902
EVA1A	IGFBP5	9606.ENSP00000233712	9606.ENSP00000233813	0	0	0	0	0.076	0	0.9	0	0.903
EVA1A	LAMC1	9606.ENSP00000233712	9606.ENSP00000258341	0	0	0	0	0.14	0	0.9	0	0.91
EVA1A	TNC	9606.ENSP00000233712	9606.ENSP00000265131	0	0	0	0	0.152	0	0.9	0	0.911
EVA1A	FN1	9606.ENSP00000233712	9606.ENSP00000346839	0	0	0	0	0.213	0	0.9	0.047	0.918
EZH2	HIST1H2BK	9606.ENSP00000320147	9606.ENSP00000349430	0	0	0	0	0.065	0.109	0.9	0.064	0.911
EZH2	H2AFX	9606.ENSP00000320147	9606.ENSP00000434024	0	0	0	0	0.131	0.152	0.9	0.39	0.949
EZH2	PHF19	9606.ENSP00000320147	9606.ENSP00000483946	0	0	0	0	0.107	0.824	0.9	0.575	0.992
F11R	ITGAV	9606.ENSP00000357005	9606.ENSP00000261023	0	0	0	0	0	0	0.9	0.154	0.911
F11R	TGFBR2	9606.ENSP00000357005	9606.ENSP00000351905	0	0	0	0	0.061	0	0.9	0	0.902
FBN2	ITGAV	9606.ENSP00000424571	9606.ENSP00000261023	0	0	0	0	0.085	0.103	0.9	0.089	0.915
FHL2	IGFBP5	9606.ENSP00000386665	9606.ENSP00000233813	0	0	0	0	0	0.379	0	0.9	0.935
FHL2	HELZ2	9606.ENSP00000386665	9606.ENSP00000417401	0	0	0	0	0.051	0	0.9	0	0.901
FHL2	NNMT	9606.ENSP00000386665	9606.ENSP00000441434	0	0	0	0	0.951	0	0	0	0.951
FLNA	FLNB	9606.ENSP00000358866	9606.ENSP00000420213	0	0	0	0.974	0.202	0.827	0.8	0.845	0.97
FLT1	KDR	9606.ENSP00000282397	9606.ENSP00000263923	0	0	0	0.909	0.162	0.865	0.9	0.954	0.988
FN1	SERPINE1	9606.ENSP00000346839	9606.ENSP00000223095	0	0	0	0	0.295	0	0.9	0.735	0.979
FN1	IGFBP5	9606.ENSP00000346839	9606.ENSP00000233813	0	0	0	0	0.197	0.379	0.9	0.691	0.982
FN1	TGFB3	9606.ENSP00000346839	9606.ENSP00000238682	0	0	0	0	0.061	0	0.9	0.681	0.967
FN1	ZC3HAV1	9606.ENSP00000346839	9606.ENSP00000242351	0	0	0	0	0	0	0.9	0.046	0.9
FN1	LAMC1	9606.ENSP00000346839	9606.ENSP00000258341	0	0	0	0	0.222	0	0.9	0.44	0.952
FN1	THBS1	9606.ENSP00000346839	9606.ENSP00000260356	0	0	0	0	0.169	0.379	0.9	0.692	0.982
FN1	ITGAV	9606.ENSP00000346839	9606.ENSP00000261023	0	0	0	0	0.141	0.87	0.9	0.678	0.995
FN1	TNC	9606.ENSP00000346839	9606.ENSP00000265131	0	0	0	0.582	0.296	0.379	0.9	0.61	0.964
FN1	MFGE8	9606.ENSP00000346839	9606.ENSP00000268150	0	0	0	0	0.117	0	0.9	0.297	0.932
FN1	MAP2K1	9606.ENSP00000346839	9606.ENSP00000302486	0	0	0	0	0	0	0.9	0.529	0.95
FN1	TLN1	9606.ENSP00000346839	9606.ENSP00000316029	0	0	0	0	0.061	0.08	0.9	0.511	0.952
FN1	PLAUR	9606.ENSP00000346839	9606.ENSP00000339328	0	0	0	0	0.061	0	0.9	0.593	0.958
FN1	TEK	9606.ENSP00000346839	9606.ENSP00000369375	0	0	0	0.54	0.098	0	0.9	0.596	0.931
FN1	SPARCL1	9606.ENSP00000346839	9606.ENSP00000414856	0	0	0	0	0.061	0	0.9	0.348	0.933
FN1	LMNA	9606.ENSP00000346839	9606.ENSP00000357283	0	0	0	0	0.107	0.08	0.9	0.419	0.945
FN1	SPP1	9606.ENSP00000346839	9606.ENSP00000378517	0	0	0	0	0.102	0	0.9	0.769	0.977
FOS	TRIP6	9606.ENSP00000306245	9606.ENSP00000200457	0	0	0	0	0	0	0.9	0.184	0.914
FOS	TGFB3	9606.ENSP00000306245	9606.ENSP00000238682	0	0	0	0	0	0	0.9	0.262	0.923
FOS	FOSB	9606.ENSP00000306245	9606.ENSP00000245919	0	0	0	0.866	0.899	0.139	0.8	0.947	0.983
FOS	HIST1H2BK	9606.ENSP00000306245	9606.ENSP00000349430	0	0	0	0	0	0	0.9	0.044	0.9
FOS	H2AFX	9606.ENSP00000306245	9606.ENSP00000434024	0	0	0	0	0	0	0.9	0.243	0.921
FOS	GATA2	9606.ENSP00000306245	9606.ENSP00000345681	0	0	0	0	0.061	0.079	0.9	0.476	0.948
FOS	NFATC2	9606.ENSP00000306245	9606.ENSP00000379330	0	0	0	0	0	0.379	0.9	0.545	0.969
FOSB	HIST1H2BK	9606.ENSP00000245919	9606.ENSP00000349430	0	0	0	0	0	0	0.9	0	0.9
FOSB	H2AFX	9606.ENSP00000245919	9606.ENSP00000434024	0	0	0	0	0	0	0.9	0.085	0.904
FZD6	FZD7	9606.ENSP00000351605	9606.ENSP00000286201	0	0	0	0.909	0	0	0.9	0.714	0.906
FZD6	WNT7B	9606.ENSP00000351605	9606.ENSP00000341032	0	0	0	0	0	0.262	0.9	0.586	0.966
FZD6	PLCB3	9606.ENSP00000351605	9606.ENSP00000443631	0	0	0	0	0	0.145	0.9	0.067	0.913
FZD7	WNT7B	9606.ENSP00000286201	9606.ENSP00000341032	0	0	0	0	0	0.262	0.9	0.557	0.964
GAD1	SNAP25	9606.ENSP00000350928	9606.ENSP00000254976	0	0	0	0	0.343	0	0.9	0.429	0.959
GAD1	GAD2	9606.ENSP00000350928	9606.ENSP00000365437	0	0	0.448	0.969	0.238	0.454	0.9	0.932	0.956
GAD2	SNAP25	9606.ENSP00000365437	9606.ENSP00000254976	0	0	0	0	0.474	0	0.9	0.425	0.967
GAL	MCHR1	9606.ENSP00000265643	9606.ENSP00000249016	0	0	0	0	0	0	0.9	0.202	0.916
GAL	S1PR1	9606.ENSP00000265643	9606.ENSP00000305416	0	0	0	0	0	0	0.9	0	0.9
GATA2	RUNX1	9606.ENSP00000345681	9606.ENSP00000300305	0	0	0	0	0	0.26	0.9	0.611	0.968
GCNT4	HS3ST3A1	9606.ENSP00000317027	9606.ENSP00000284110	0	0	0	0	0	0	0	0.901	0.901
GINS3	MCM6	9606.ENSP00000401018	9606.ENSP00000264156	0	0	0	0	0.327	0.607	0.9	0.753	0.992
GINS3	GINS4	9606.ENSP00000401018	9606.ENSP00000276533	0	0	0	0	0.148	0.994	0.9	0.972	0.999
GINS3	TIMELESS	9606.ENSP00000401018	9606.ENSP00000450607	0	0	0	0	0.258	0.862	0	0.44	0.937
GINS4	MCM6	9606.ENSP00000276533	9606.ENSP00000264156	0	0	0	0	0.561	0.737	0.9	0.824	0.997
H2AFX	THBS1	9606.ENSP00000434024	9606.ENSP00000260356	0	0	0	0	0	0	0.9	0.211	0.917
H2AFX	LEF1	9606.ENSP00000434024	9606.ENSP00000265165	0	0	0	0	0	0	0.9	0.123	0.908
H2AFX	TCF7L1	9606.ENSP00000434024	9606.ENSP00000282111	0	0	0	0	0	0	0.9	0.049	0.9
H2AFX	PLK1	9606.ENSP00000434024	9606.ENSP00000300093	0	0	0	0	0.229	0	0.9	0.538	0.961
H2AFX	RUNX1	9606.ENSP00000434024	9606.ENSP00000300305	0	0	0	0	0	0	0.9	0	0.9
H2AFX	HIST1H2BK	9606.ENSP00000434024	9606.ENSP00000349430	0	0	0	0	0.197	0.372	0.9	0.212	0.954
H2AFX	ZNF217	9606.ENSP00000434024	9606.ENSP00000360526	0	0	0	0	0.055	0.06	0.9	0.188	0.918
H2AFX	PHF19	9606.ENSP00000434024	9606.ENSP00000483946	0	0	0	0	0.14	0.063	0.9	0.09	0.916
HAUS8	PLK4	9606.ENSP00000253669	9606.ENSP00000270861	0	0	0	0	0.087	0	0.9	0.183	0.919
HAUS8	PLK1	9606.ENSP00000253669	9606.ENSP00000300093	0	0	0	0	0.113	0	0.9	0.246	0.927
HAUS8	NEDD1	9606.ENSP00000253669	9606.ENSP00000451211	0	0	0	0	0	0	0.9	0.613	0.959
HELZ2	PEX11A	9606.ENSP00000417401	9606.ENSP00000300056	0	0	0	0	0	0	0.9	0.059	0.901
HELZ2	LPL	9606.ENSP00000417401	9606.ENSP00000309757	0	0	0	0	0	0	0.9	0.096	0.905
HIST1H2BK	THBS1	9606.ENSP00000349430	9606.ENSP00000260356	0	0	0	0	0	0	0.9	0.049	0.9
HIST1H2BK	LEF1	9606.ENSP00000349430	9606.ENSP00000265165	0	0	0	0	0	0	0.9	0	0.9
HIST1H2BK	TCF7L1	9606.ENSP00000349430	9606.ENSP00000282111	0	0	0	0	0	0	0.9	0	0.9
HIST1H2BK	PLK1	9606.ENSP00000349430	9606.ENSP00000300093	0	0	0	0	0.062	0	0.9	0.181	0.916
HIST1H2BK	RUNX1	9606.ENSP00000349430	9606.ENSP00000300305	0	0	0	0	0	0	0.9	0	0.9
HIST1H2BK	ZNF217	9606.ENSP00000349430	9606.ENSP00000360526	0	0	0	0	0.069	0.077	0.9	0	0.906
HIST1H2BK	PHF19	9606.ENSP00000349430	9606.ENSP00000483946	0	0	0	0	0.063	0.08	0.9	0	0.906
HOXA5	HOXC5	9606.ENSP00000222726	9606.ENSP00000309336	0	0	0	0.908	0.166	0.96	0	0.688	0.967
HOXA5	HOXB6	9606.ENSP00000222726	9606.ENSP00000420009	0	0	0	0.859	0.239	0.96	0	0.68	0.971
HOXB6	HOXC5	9606.ENSP00000420009	9606.ENSP00000309336	0	0	0	0.83	0.158	0.96	0	0.63	0.968
HS3ST3A1	HSPG2	9606.ENSP00000284110	9606.ENSP00000363827	0	0	0	0	0.061	0	0.9	0.316	0.93
HSPG2	LAMA4	9606.ENSP00000363827	9606.ENSP00000230538	0	0	0	0.543	0.118	0.136	0.9	0.304	0.927
HSPG2	LAMC1	9606.ENSP00000363827	9606.ENSP00000258341	0	0	0	0.572	0.172	0.136	0.9	0.751	0.946
HSPG2	KDR	9606.ENSP00000363827	9606.ENSP00000263923	0	0	0	0.543	0.095	0.467	0.9	0.458	0.957
HSPG2	MFGE8	9606.ENSP00000363827	9606.ENSP00000268150	0	0	0	0	0.127	0	0.9	0.09	0.913
HTR2A	UTS2	9606.ENSP00000437737	9606.ENSP00000054668	0	0	0	0	0	0	0.9	0	0.9
HTR2A	MCHR1	9606.ENSP00000437737	9606.ENSP00000249016	0	0	0	0.576	0.095	0	0.9	0.139	0.909
HTR2A	LPAR4	9606.ENSP00000437737	9606.ENSP00000408205	0	0	0	0.567	0	0	0.9	0	0.9
HTR2A	PLCB3	9606.ENSP00000437737	9606.ENSP00000443631	0	0	0	0	0	0.062	0.9	0.127	0.91
IFI35	MX1	9606.ENSP00000395590	9606.ENSP00000381601	0	0	0	0	0.775	0	0.9	0.588	0.989
IGFBP5	MFGE8	9606.ENSP00000233813	9606.ENSP00000268150	0	0	0	0	0.087	0	0.9	0.073	0.907
IGFBP5	SPARCL1	9606.ENSP00000233813	9606.ENSP00000414856	0	0	0	0	0.157	0	0.9	0	0.912
IGFBP5	TNC	9606.ENSP00000233813	9606.ENSP00000265131	0	0	0	0	0.188	0	0.9	0.063	0.917
IGFBP5	LAMC1	9606.ENSP00000233813	9606.ENSP00000258341	0	0	0	0	0.098	0	0.9	0.229	0.924
IGFBP5	SPP1	9606.ENSP00000233813	9606.ENSP00000378517	0	0	0	0	0.065	0.379	0.9	0.326	0.955
ITGA11	ITGAV	9606.ENSP00000327290	9606.ENSP00000261023	0	0	0	0.582	0.061	0	0.9	0.519	0.922
ITGA11	ITGB5	9606.ENSP00000327290	9606.ENSP00000296181	0	0	0	0	0.062	0.303	0.9	0.545	0.966
ITGAV	SERPINE1	9606.ENSP00000261023	9606.ENSP00000223095	0	0	0	0	0.076	0	0.9	0.31	0.93
ITGAV	LAMA4	9606.ENSP00000261023	9606.ENSP00000230538	0	0	0	0	0.084	0.157	0.9	0.304	0.939
ITGAV	TGFB3	9606.ENSP00000261023	9606.ENSP00000238682	0	0	0	0	0.049	0.405	0.9	0.235	0.95
ITGAV	SNAP25	9606.ENSP00000261023	9606.ENSP00000254976	0	0	0	0	0.062	0	0.9	0.052	0.903
ITGAV	LAMC1	9606.ENSP00000261023	9606.ENSP00000258341	0	0	0	0	0.158	0.157	0.9	0.328	0.945
ITGAV	SPHK1	9606.ENSP00000261023	9606.ENSP00000313681	0	0	0	0	0	0	0.9	0.062	0.902
ITGAV	TMEM63A	9606.ENSP00000261023	9606.ENSP00000355800	0	0	0	0	0.061	0	0.9	0	0.902
ITGAV	TNC	9606.ENSP00000261023	9606.ENSP00000265131	0	0	0	0	0.107	0.161	0.9	0.059	0.92
ITGAV	TNFRSF1B	9606.ENSP00000261023	9606.ENSP00000365435	0	0	0	0	0.055	0	0.9	0.242	0.922
ITGAV	TGFBR2	9606.ENSP00000261023	9606.ENSP00000351905	0	0	0	0	0.078	0.084	0.9	0.251	0.928
ITGAV	KDR	9606.ENSP00000261023	9606.ENSP00000263923	0	0	0	0	0.062	0	0.9	0.354	0.934
ITGAV	PLAUR	9606.ENSP00000261023	9606.ENSP00000339328	0	0	0	0	0	0	0.9	0.42	0.939
ITGAV	MFGE8	9606.ENSP00000261023	9606.ENSP00000268150	0	0	0	0	0.061	0	0.9	0.511	0.95
ITGAV	TLN1	9606.ENSP00000261023	9606.ENSP00000316029	0	0	0	0	0.077	0.185	0.9	0.493	0.956
ITGAV	SPP1	9606.ENSP00000261023	9606.ENSP00000378517	0	0	0	0	0.078	0.379	0.9	0.555	0.971
ITGAV	ITGB5	9606.ENSP00000261023	9606.ENSP00000296181	0	0	0	0	0.117	0.548	0.9	0.75	0.988
ITGB5	SERPINE1	9606.ENSP00000296181	9606.ENSP00000223095	0	0	0	0	0.125	0	0.9	0.132	0.917
ITGB5	TGFB3	9606.ENSP00000296181	9606.ENSP00000238682	0	0	0	0	0.061	0.097	0.9	0.165	0.919
ITGB5	PLAUR	9606.ENSP00000296181	9606.ENSP00000339328	0	0	0	0	0	0	0.9	0.15	0.911
ITGB5	SPP1	9606.ENSP00000296181	9606.ENSP00000378517	0	0	0	0	0.084	0.305	0.9	0.244	0.945
ITGB5	TLN1	9606.ENSP00000296181	9606.ENSP00000316029	0	0	0	0	0.061	0.442	0.9	0.255	0.955
JAG1	RUNX3	9606.ENSP00000254958	9606.ENSP00000382800	0	0	0	0	0	0	0.9	0.48	0.945
KIF1C	KIF2C	9606.ENSP00000320821	9606.ENSP00000361298	0	0	0	0.638	0	0	0.9	0.385	0.913
KIF1C	KIF4B	9606.ENSP00000320821	9606.ENSP00000387875	0	0	0	0.639	0	0.125	0.9	0.379	0.92
KIF1C	RACGAP1	9606.ENSP00000320821	9606.ENSP00000404190	0	0	0	0	0.075	0.186	0.9	0.075	0.921
KIF1C	KIF4A	9606.ENSP00000320821	9606.ENSP00000363524	0	0	0	0.637	0	0.125	0.9	0.48	0.923
KIF2C	PLK1	9606.ENSP00000361298	9606.ENSP00000300093	0	0	0	0	0.81	0.472	0.9	0.871	0.998
KIF2C	SGOL2	9606.ENSP00000361298	9606.ENSP00000350447	0	0	0	0	0.321	0.328	0.9	0.669	0.982
KIF2C	NUP37	9606.ENSP00000361298	9606.ENSP00000448054	0	0	0	0	0.197	0	0.9	0.118	0.923
KIF2C	PBK	9606.ENSP00000361298	9606.ENSP00000428489	0	0	0	0	0.913	0.126	0	0.27	0.94
KIF2C	KIF4B	9606.ENSP00000361298	9606.ENSP00000387875	0	0	0	0.662	0.451	0	0.9	0.522	0.952
KIF2C	RACGAP1	9606.ENSP00000361298	9606.ENSP00000404190	0	0	0	0	0.794	0.186	0.9	0.471	0.989
KIF2C	KIF4A	9606.ENSP00000361298	9606.ENSP00000363524	0	0	0	0.666	0.889	0	0.9	0.75	0.991
KIF4A	PLK1	9606.ENSP00000363524	9606.ENSP00000300093	0	0	0	0	0.901	0.171	0	0.615	0.965
KIF4A	KIF4B	9606.ENSP00000363524	9606.ENSP00000387875	0	0	0	0.986	0.098	0	0.9	0.879	0.907
KIF4A	PBK	9606.ENSP00000363524	9606.ENSP00000428489	0	0	0	0	0.896	0.126	0	0.318	0.932
KIF4A	RACGAP1	9606.ENSP00000363524	9606.ENSP00000404190	0	0	0	0	0.909	0.186	0.9	0.617	0.996
KIF4B	RACGAP1	9606.ENSP00000387875	9606.ENSP00000404190	0	0	0	0	0.663	0.186	0.9	0.279	0.977
LAMA4	NTN4	9606.ENSP00000230538	9606.ENSP00000340998	0	0.001	0	0.562	0.198	0.195	0.9	0.085	0.931
LAMA4	LAMC1	9606.ENSP00000230538	9606.ENSP00000258341	0	0	0	0.55	0.116	0	0.9	0.718	0.937
LAMC1	MFGE8	9606.ENSP00000258341	9606.ENSP00000268150	0	0	0	0	0.095	0	0.9	0.049	0.906
LAMC1	SPP1	9606.ENSP00000258341	9606.ENSP00000378517	0	0	0	0	0.061	0	0.9	0.108	0.908
LAMC1	SPARCL1	9606.ENSP00000258341	9606.ENSP00000414856	0	0	0	0	0.061	0	0.9	0.122	0.91
LAMC1	TNC	9606.ENSP00000258341	9606.ENSP00000265131	0	0	0	0	0.169	0.05	0.9	0.284	0.936
LAMC1	NTN4	9606.ENSP00000258341	9606.ENSP00000340998	0	0	0	0.716	0.228	0.299	0.9	0.239	0.944
LEF1	TCF7L1	9606.ENSP00000265165	9606.ENSP00000282111	0	0	0	0.934	0.061	0	0.9	0.695	0.906
LEF1	RUNX3	9606.ENSP00000265165	9606.ENSP00000382800	0	0	0	0	0.073	0	0.9	0.34	0.933
LMNA	ZC3HAV1	9606.ENSP00000357283	9606.ENSP00000242351	0	0	0	0	0	0	0.9	0.063	0.902
LMNA	MAP2K1	9606.ENSP00000357283	9606.ENSP00000302486	0	0	0	0	0	0	0.9	0.318	0.928
LMNA	TLN1	9606.ENSP00000357283	9606.ENSP00000316029	0	0	0	0	0.07	0	0.9	0.111	0.91
LPAR4	UTS2	9606.ENSP00000408205	9606.ENSP00000054668	0	0	0	0	0	0	0.9	0	0.9
LPAR4	MCHR1	9606.ENSP00000408205	9606.ENSP00000249016	0	0	0	0.614	0	0	0.9	0.054	0.9
LPAR4	PLCB3	9606.ENSP00000408205	9606.ENSP00000443631	0	0	0	0	0	0	0.9	0.05	0.9
LPL	PCSK5	9606.ENSP00000309757	9606.ENSP00000446280	0	0	0	0	0	0	0.9	0.175	0.914
LUM	TGFB3	9606.ENSP00000266718	9606.ENSP00000238682	0	0	0	0	0.09	0.054	0.9	0.197	0.921
MAP2K1	NTN1	9606.ENSP00000302486	9606.ENSP00000173229	0	0	0	0	0	0	0.9	0.351	0.932
MAP2K1	ZC3HAV1	9606.ENSP00000302486	9606.ENSP00000242351	0	0	0	0	0	0	0.9	0	0.9
MAP2K1	TLN1	9606.ENSP00000302486	9606.ENSP00000316029	0	0	0	0	0	0	0.9	0.087	0.904
MCHR1	UTS2	9606.ENSP00000249016	9606.ENSP00000054668	0	0	0	0	0.064	0	0.9	0.049	0.903
MCHR1	S1PR1	9606.ENSP00000249016	9606.ENSP00000305416	0	0	0	0	0	0	0.9	0	0.9
MCHR1	PLCB3	9606.ENSP00000249016	9606.ENSP00000443631	0	0	0	0	0.061	0.062	0.9	0	0.904
MFGE8	TNC	9606.ENSP00000268150	9606.ENSP00000265131	0	0	0	0	0.08	0	0.9	0	0.904
MFGE8	SPARCL1	9606.ENSP00000268150	9606.ENSP00000414856	0	0	0	0	0.055	0	0.9	0.086	0.906
MFGE8	SPP1	9606.ENSP00000268150	9606.ENSP00000378517	0	0	0	0	0.061	0	0.9	0.287	0.927
MLC1	TLN1	9606.ENSP00000310375	9606.ENSP00000316029	0	0	0	0	0	0	0.9	0.07	0.903
MMP2	TEK	9606.ENSP00000219070	9606.ENSP00000369375	0	0	0	0	0.142	0	0.9	0.472	0.95
MMP2	THBS1	9606.ENSP00000219070	9606.ENSP00000260356	0	0	0	0	0.156	0.294	0.8	0.724	0.962
MMP2	TIMP3	9606.ENSP00000219070	9606.ENSP00000266085	0	0	0	0	0.288	0.457	0.8	0.838	0.985
MYBL2	TFAP2A	9606.ENSP00000217026	9606.ENSP00000368924	0	0	0	0	0.089	0	0.9	0.09	0.909
MYBL2	PLK1	9606.ENSP00000217026	9606.ENSP00000300093	0	0	0	0	0.596	0	0.9	0.496	0.977
MYO10	NTN1	9606.ENSP00000421280	9606.ENSP00000173229	0	0	0	0	0.061	0	0.9	0.281	0.926
NABP1	POU2F2	9606.ENSP00000403683	9606.ENSP00000431603	0	0	0	0	0	0	0.9	0	0.9
NEDD1	PLK4	9606.ENSP00000451211	9606.ENSP00000270861	0	0	0	0	0.123	0.117	0.9	0.562	0.961
NEDD1	PLK1	9606.ENSP00000451211	9606.ENSP00000300093	0	0	0	0	0.085	0	0.9	0.759	0.976
NEK9	NUP37	9606.ENSP00000238616	9606.ENSP00000448054	0	0	0	0	0	0	0.9	0.048	0.9
NEK9	PLK1	9606.ENSP00000238616	9606.ENSP00000300093	0	0	0	0.614	0.064	0.472	0.9	0.709	0.96
NFATC2	RUNX1	9606.ENSP00000379330	9606.ENSP00000300305	0	0	0	0	0.065	0.135	0.9	0.181	0.924
NPPB	NPR3	9606.ENSP00000365651	9606.ENSP00000265074	0	0	0	0	0	0.87	0	0.738	0.964
NUP37	PLK1	9606.ENSP00000448054	9606.ENSP00000300093	0	0	0	0	0.132	0	0.9	0.089	0.914
NUP37	SGOL2	9606.ENSP00000448054	9606.ENSP00000350447	0	0	0	0	0.203	0	0.9	0	0.916
PBK	PLK1	9606.ENSP00000428489	9606.ENSP00000300093	0	0	0	0	0.964	0	0	0.351	0.976
PBK	RACGAP1	9606.ENSP00000428489	9606.ENSP00000404190	0	0	0	0	0.898	0.064	0	0.188	0.916
PGAM2	PHGDH	9606.ENSP00000297283	9606.ENSP00000358417	0	0.02	0	0	0.055	0	0.9	0.218	0.919
PHGDH	PSAT1	9606.ENSP00000358417	9606.ENSP00000365773	0.185	0	0	0	0.95	0.413	0.9	0.916	0.999
PLAT	SERPINE1	9606.ENSP00000220809	9606.ENSP00000223095	0	0	0	0	0.148	0.881	0.9	0.956	0.999
PLAUR	SERPINE1	9606.ENSP00000339328	9606.ENSP00000223095	0	0	0	0	0.161	0	0.9	0.895	0.99
PLAUR	SNAP25	9606.ENSP00000339328	9606.ENSP00000254976	0	0	0	0	0	0	0.9	0	0.9
PLAUR	TMEM63A	9606.ENSP00000339328	9606.ENSP00000355800	0	0	0	0	0.057	0	0.9	0	0.901
PLAUR	TNFRSF1B	9606.ENSP00000339328	9606.ENSP00000365435	0	0	0	0	0.108	0	0.9	0.172	0.919
PLCB3	UTS2	9606.ENSP00000443631	9606.ENSP00000054668	0	0	0	0	0	0	0.9	0	0.9
PLK1	PLK4	9606.ENSP00000300093	9606.ENSP00000270861	0	0	0	0.707	0.441	0.184	0.9	0.887	0.963
PLK1	SGOL2	9606.ENSP00000300093	9606.ENSP00000350447	0	0	0	0	0.605	0	0.9	0.495	0.978
PLK1	RACGAP1	9606.ENSP00000300093	9606.ENSP00000404190	0	0	0	0	0.886	0.472	0	0.899	0.993
RAB32	RAB34	9606.ENSP00000356465	9606.ENSP00000413156	0	0	0.379	0.704	0.098	0	0.9	0.643	0.931
RNF182	TRIM4	9606.ENSP00000420465	9606.ENSP00000348216	0	0	0	0	0	0	0.9	0	0.9
RPL22L1	RPL39L	9606.ENSP00000346080	9606.ENSP00000296277	0	0	0	0	0.651	0.732	0.9	0.708	0.996
RUNX1	THBS1	9606.ENSP00000300305	9606.ENSP00000260356	0	0	0	0	0.076	0	0.9	0	0.903
RUNX1	RUNX3	9606.ENSP00000300305	9606.ENSP00000382800	0	0	0	0.956	0.065	0	0.9	0.655	0.905
RUNX3	TCF7L1	9606.ENSP00000382800	9606.ENSP00000282111	0	0	0	0	0	0	0.9	0.104	0.906
RUNX3	TEAD4	9606.ENSP00000382800	9606.ENSP00000352926	0	0	0	0	0	0	0.9	0.462	0.943
RUNX3	SPP1	9606.ENSP00000382800	9606.ENSP00000378517	0	0	0	0	0	0	0.9	0.547	0.952
SEMA5B	THBS1	9606.ENSP00000389588	9606.ENSP00000260356	0	0	0	0.554	0	0	0.9	0.213	0.907
SEMA5B	THSD4	9606.ENSP00000389588	9606.ENSP00000347484	0	0	0	0.541	0	0	0.9	0	0.9
SERPINE1	TGIF2	9606.ENSP00000223095	9606.ENSP00000362981	0	0	0	0	0	0	0.9	0.064	0.902
SERPINE1	TGIF1	9606.ENSP00000223095	9606.ENSP00000327959	0	0	0	0	0.066	0	0.9	0.129	0.911
SERPINE1	TGFB3	9606.ENSP00000223095	9606.ENSP00000238682	0	0	0	0	0.062	0	0.9	0.633	0.962
SERPINE1	THBS1	9606.ENSP00000223095	9606.ENSP00000260356	0	0	0	0	0.273	0	0.9	0.616	0.969
SNAP25	TNFRSF1B	9606.ENSP00000254976	9606.ENSP00000365435	0	0	0	0	0	0	0.9	0	0.9
SNAP25	TMEM63A	9606.ENSP00000254976	9606.ENSP00000355800	0	0	0	0	0.062	0	0.9	0	0.902
SPARCL1	TNC	9606.ENSP00000414856	9606.ENSP00000265131	0	0	0	0	0.064	0	0.9	0.079	0.906
SPARCL1	SPP1	9606.ENSP00000414856	9606.ENSP00000378517	0	0	0	0	0.11	0	0.9	0.597	0.961
SPP1	TNC	9606.ENSP00000378517	9606.ENSP00000265131	0	0	0	0	0.072	0	0.9	0.087	0.907
SYNJ2	TRIP10	9606.ENSP00000347792	9606.ENSP00000320117	0	0	0	0	0.049	0.191	0.9	0.252	0.934
TFAP2A	TFAP2B	9606.ENSP00000368924	9606.ENSP00000377265	0	0	0	0.971	0.235	0.379	0.9	0.75	0.949
TFAP2B	TGFB3	9606.ENSP00000377265	9606.ENSP00000238682	0	0	0	0	0	0	0.9	0	0.9
TFAP2B	TGFBR2	9606.ENSP00000377265	9606.ENSP00000351905	0	0	0	0	0	0	0.9	0.168	0.913
TGFB3	THBS1	9606.ENSP00000238682	9606.ENSP00000260356	0	0	0	0	0.062	0	0.9	0.338	0.932
TGFB3	TGFBR2	9606.ENSP00000238682	9606.ENSP00000351905	0	0	0	0	0.062	0.961	0.9	0.685	0.998
THBS1	THSD4	9606.ENSP00000260356	9606.ENSP00000347484	0	0	0	0	0.088	0	0.9	0.16	0.916
TLN1	ZC3HAV1	9606.ENSP00000316029	9606.ENSP00000242351	0	0	0	0	0	0	0.9	0	0.9
TMEM63A	TNFRSF1B	9606.ENSP00000355800	9606.ENSP00000365435	0	0	0	0	0.059	0	0.9	0	0.901
TNFRSF12A	TNFRSF1B	9606.ENSP00000326737	9606.ENSP00000365435	0	0	0	0	0	0	0.9	0.423	0.939
TNFRSF1A	TNFRSF1B	9606.ENSP00000162749	9606.ENSP00000365435	0	0	0	0	0.063	0.336	0.9	0.923	0.994
Table S3. List of nodes from protein–protein interactionPPI network analysis of differentially expressed geneDEGs C9 versusvs C9-KO without additional known interactors enabled. Refers to fig.Fig 4d. For each node1 (protein) a complete list of direct “‘first shell”’ interactors is provided as node2.
