# Supplementary material for: Concomitant gain and loss of function pathomechanisms in C9ORF72 amyotrophic lateral sclerosis
Source: Life Sci Alliance. 2021 Feb 22;4(4):e202000764. doi: 10.26508/lsa.202000764 (PMC7918691; doi:10.26508/lsa.202000764)
Supplement: Supplementary file 7 [file LSA-2020-00764_TableS5.xlsx]

## Sheet: Sheet1
Supplemental table S5 - protein-protein interaction analysis of common DEGs C9 vs C9-GC and C9 vs C9-KO, with 100 additional known interactors enabled
Number of nodes =480
Number of edges = 1641
Average node degree = 6.84
Average local clustering coefficient = 0.404
PPI enrichment p-value = < 1.0e-16
#node1	node2	node1_string_id	node2_string_id	neighborhood_on_chromosome	gene_fusion	phylogenetic_cooccurrence	homology	coexpression	experimentally_determined_interaction	database_annotated	automated_textmining	combined_score
ACOX2	CAT	9606.ENSP00000307697	9606.ENSP00000241052	0.069	0	0	0	0.115	0.195	0.9	0.545	0.964
ACTA1	VCL	9606.ENSP00000355645	9606.ENSP00000211998	0	0	0	0	0.063	0.599	0.9	0.593	0.982
ACTA1	PFN1	9606.ENSP00000355645	9606.ENSP00000225655	0	0	0	0	0.055	0.968	0	0.387	0.98
ACTA1	LAMA4	9606.ENSP00000355645	9606.ENSP00000230538	0	0	0	0	0.061	0	0.9	0.087	0.906
ACTA1	ACTN4	9606.ENSP00000355645	9606.ENSP00000252699	0	0	0	0	0.087	0.381	0.9	0.378	0.96
ACTA1	LAMC1	9606.ENSP00000355645	9606.ENSP00000258341	0	0	0	0	0.061	0	0.9	0.044	0.902
ACTA1	KDR	9606.ENSP00000355645	9606.ENSP00000263923	0	0	0	0	0	0	0.9	0.265	0.923
ACTA1	PXN	9606.ENSP00000355645	9606.ENSP00000267257	0	0	0	0	0.064	0.055	0.9	0.388	0.938
ACTA1	FLT1	9606.ENSP00000355645	9606.ENSP00000282397	0	0	0	0	0	0	0.9	0.148	0.911
ACTA1	TLN1	9606.ENSP00000355645	9606.ENSP00000316029	0	0	0	0	0.051	0.379	0.9	0.223	0.948
ACTA1	MYO10	9606.ENSP00000355645	9606.ENSP00000421280	0	0	0	0	0.061	0.889	0	0.136	0.902
ACTA1	ACTN1	9606.ENSP00000355645	9606.ENSP00000377941	0	0	0	0	0.087	0.381	0.9	0.484	0.966
ACTA2	VCL	9606.ENSP00000402373	9606.ENSP00000211998	0	0	0	0	0.063	0.382	0.9	0.551	0.97
ACTA2	CREBBP	9606.ENSP00000402373	9606.ENSP00000262367	0	0	0	0	0	0.185	0.9	0.065	0.917
ACTA2	EP300	9606.ENSP00000402373	9606.ENSP00000263253	0	0	0	0	0	0.185	0.9	0.13	0.922
ACTA2	PXN	9606.ENSP00000402373	9606.ENSP00000267257	0	0	0	0	0.064	0.055	0.9	0.372	0.937
ACTA2	ITGB5	9606.ENSP00000402373	9606.ENSP00000296181	0	0	0	0	0.061	0.088	0.9	0.186	0.92
ACTA2	TLN1	9606.ENSP00000402373	9606.ENSP00000316029	0	0	0	0	0.061	0	0.9	0.211	0.919
ACTN1	VCL	9606.ENSP00000377941	9606.ENSP00000211998	0	0	0	0	0.273	0.974	0.9	0.77	0.999
ACTN1	SERPINE1	9606.ENSP00000377941	9606.ENSP00000223095	0	0	0	0	0.135	0	0.9	0.101	0.915
ACTN1	ACTN4	9606.ENSP00000377941	9606.ENSP00000252699	0	0	0	0.982	0.107	0.997	0.9	0.725	0.999
ACTN1	THBS1	9606.ENSP00000377941	9606.ENSP00000260356	0	0	0	0	0.098	0	0.9	0.186	0.92
ACTN1	PXN	9606.ENSP00000377941	9606.ENSP00000267257	0	0	0	0	0.129	0.192	0.9	0.474	0.958
ACTN1	VEGFB	9606.ENSP00000377941	9606.ENSP00000311127	0	0	0	0	0	0	0.9	0	0.9
ACTN1	TLN1	9606.ENSP00000377941	9606.ENSP00000316029	0	0	0	0	0.116	0.083	0.9	0.622	0.965
ACTN1	FN1	9606.ENSP00000377941	9606.ENSP00000346839	0	0	0	0	0.116	0	0.9	0.398	0.942
ACTN4	VCL	9606.ENSP00000252699	9606.ENSP00000211998	0	0	0	0	0.114	0.96	0.9	0.734	0.998
ACTN4	SERPINE1	9606.ENSP00000252699	9606.ENSP00000223095	0	0	0	0	0.085	0.379	0.9	0.154	0.945
ACTN4	VEGFB	9606.ENSP00000252699	9606.ENSP00000311127	0	0	0	0	0.065	0	0.9	0	0.902
ACTN4	THBS1	9606.ENSP00000252699	9606.ENSP00000260356	0	0	0	0	0.061	0	0.9	0.116	0.909
ACTN4	FN1	9606.ENSP00000252699	9606.ENSP00000346839	0	0	0	0	0.07	0.08	0.9	0.365	0.938
ACTN4	PXN	9606.ENSP00000252699	9606.ENSP00000267257	0	0	0	0	0.128	0.192	0.9	0.454	0.956
ACTN4	TLN1	9606.ENSP00000252699	9606.ENSP00000316029	0	0	0	0	0.16	0.083	0.9	0.529	0.958
ADAMTS1	THBS1	9606.ENSP00000284984	9606.ENSP00000260356	0	0	0	0.545	0.096	0	0.9	0.64	0.932
ADAMTS1	SEMA5B	9606.ENSP00000284984	9606.ENSP00000389588	0	0	0	0.543	0	0	0.9	0.089	0.902
ADAMTS1	ADAMTS15	9606.ENSP00000284984	9606.ENSP00000299164	0	0	0	0.938	0.088	0	0.9	0.718	0.909
ADAMTS1	THSD4	9606.ENSP00000284984	9606.ENSP00000347484	0	0	0	0.577	0.088	0	0.9	0.313	0.916
ADAMTS1	ADAMTS12	9606.ENSP00000284984	9606.ENSP00000422554	0	0	0	0.791	0.117	0	0.9	0.651	0.92
ADAMTS1	ADAMTS3	9606.ENSP00000284984	9606.ENSP00000286657	0	0	0	0.747	0.076	0	0.9	0.757	0.921
ADAMTS12	THBS1	9606.ENSP00000422554	9606.ENSP00000260356	0	0	0	0.544	0.114	0	0.9	0.627	0.933
ADAMTS12	ADAMTS3	9606.ENSP00000422554	9606.ENSP00000286657	0	0	0	0.739	0.096	0	0.9	0.559	0.919
ADAMTS12	ADAMTS15	9606.ENSP00000422554	9606.ENSP00000299164	0	0	0	0.793	0.111	0	0.9	0.737	0.921
ADAMTS12	THSD4	9606.ENSP00000422554	9606.ENSP00000347484	0	0	0	0.623	0.073	0	0.9	0.437	0.918
ADAMTS12	SEMA5B	9606.ENSP00000422554	9606.ENSP00000389588	0	0	0	0.541	0.063	0	0.9	0	0.902
ADAMTS15	THBS1	9606.ENSP00000299164	9606.ENSP00000260356	0	0	0	0.544	0.076	0	0.9	0.387	0.919
ADAMTS15	ADAMTS3	9606.ENSP00000299164	9606.ENSP00000286657	0	0	0	0.775	0.077	0	0.9	0.687	0.918
ADAMTS15	SEMA5B	9606.ENSP00000299164	9606.ENSP00000389588	0	0	0	0.544	0	0	0.9	0	0.9
ADAMTS15	THSD4	9606.ENSP00000299164	9606.ENSP00000347484	0	0	0	0.59	0.077	0	0.9	0.225	0.911
ADAMTS3	THBS1	9606.ENSP00000286657	9606.ENSP00000260356	0	0	0	0.541	0.062	0	0.9	0.292	0.913
ADAMTS3	COL5A3	9606.ENSP00000286657	9606.ENSP00000264828	0	0	0	0	0.049	0.064	0.9	0.41	0.94
ADAMTS3	SEMA5B	9606.ENSP00000286657	9606.ENSP00000389588	0	0	0	0.54	0.065	0	0.9	0.047	0.902
ADAMTS3	THSD4	9606.ENSP00000286657	9606.ENSP00000347484	0	0	0	0.586	0	0	0.9	0.176	0.905
AGPAT2	ITGAV	9606.ENSP00000360761	9606.ENSP00000261023	0	0	0	0	0	0	0.9	0	0.9
AGPAT2	PLAUR	9606.ENSP00000360761	9606.ENSP00000339328	0	0	0	0	0.061	0	0.9	0	0.902
AGPAT2	TMEM63A	9606.ENSP00000360761	9606.ENSP00000355800	0	0	0	0	0.061	0	0.9	0	0.902
AGPAT2	TNFRSF1B	9606.ENSP00000360761	9606.ENSP00000365435	0	0	0	0	0.062	0	0.9	0	0.902
AGTRAP	VCL	9606.ENSP00000319713	9606.ENSP00000211998	0	0	0	0	0	0	0.9	0	0.9
AGTRAP	ZC3HAV1	9606.ENSP00000319713	9606.ENSP00000242351	0	0	0	0	0	0	0.9	0	0.9
AGTRAP	BRAF	9606.ENSP00000319713	9606.ENSP00000288602	0	0	0	0	0	0	0.9	0.147	0.911
AGTRAP	MAP2K1	9606.ENSP00000319713	9606.ENSP00000302486	0	0	0	0	0	0	0.9	0.046	0.9
AGTRAP	TLN1	9606.ENSP00000319713	9606.ENSP00000316029	0	0	0	0	0	0	0.9	0	0.9
AGTRAP	FN1	9606.ENSP00000319713	9606.ENSP00000346839	0	0	0	0	0	0	0.9	0.07	0.903
ANAPC5	CDC6	9606.ENSP00000261819	9606.ENSP00000209728	0	0	0	0	0.196	0	0.9	0.32	0.94
ANAPC5	RBX1	9606.ENSP00000261819	9606.ENSP00000216225	0	0	0	0	0.059	0.463	0.9	0.312	0.96
ANAPC5	AURKA	9606.ENSP00000261819	9606.ENSP00000216911	0	0	0	0	0.098	0	0.9	0.15	0.916
ANAPC5	CDKN1B	9606.ENSP00000261819	9606.ENSP00000228872	0	0	0	0	0	0	0.9	0.064	0.902
ANAPC5	FBXO5	9606.ENSP00000261819	9606.ENSP00000229758	0	0	0	0	0.061	0.866	0	0.447	0.924
ANAPC5	SKP1	9606.ENSP00000261819	9606.ENSP00000231487	0	0	0	0	0.061	0	0.9	0.298	0.928
ANAPC5	CCNA1	9606.ENSP00000261819	9606.ENSP00000255465	0	0	0	0	0.047	0	0.9	0.182	0.915
ANAPC5	CCNB1	9606.ENSP00000261819	9606.ENSP00000256442	0	0	0	0	0.08	0	0.9	0.374	0.937
ANAPC5	ESPL1	9606.ENSP00000261819	9606.ENSP00000257934	0	0	0	0	0.164	0	0.9	0.643	0.967
ANAPC5	TRIM4	9606.ENSP00000261819	9606.ENSP00000348216	0	0	0	0	0	0	0.9	0	0.9
ANAPC5	CDKN1A	9606.ENSP00000261819	9606.ENSP00000384849	0	0	0	0	0	0	0.9	0.151	0.911
ANAPC5	SKP2	9606.ENSP00000261819	9606.ENSP00000274255	0	0	0	0	0.06	0	0.9	0.165	0.914
ANAPC5	CDK2	9606.ENSP00000261819	9606.ENSP00000266970	0	0	0	0	0.089	0	0.9	0.203	0.921
ANAPC5	CCNA2	9606.ENSP00000261819	9606.ENSP00000274026	0	0	0	0	0.047	0	0.9	0.275	0.924
ANAPC5	PLK1	9606.ENSP00000261819	9606.ENSP00000300093	0	0	0	0	0.101	0	0.9	0.326	0.934
ANAPC5	UBE2S	9606.ENSP00000261819	9606.ENSP00000264552	0	0	0	0	0.062	0.457	0.9	0.428	0.967
ANAPC5	MAD2L1	9606.ENSP00000261819	9606.ENSP00000296509	0	0	0	0	0.134	0.94	0.9	0.271	0.995
ANAPC5	CDC20	9606.ENSP00000261819	9606.ENSP00000361540	0	0	0	0	0.064	0.998	0.9	0.736	0.999
ANAPC5	BUB1B	9606.ENSP00000261819	9606.ENSP00000287598	0	0	0	0	0.191	0.995	0.9	0.5	0.999
APITD1	RPA3	9606.ENSP00000308583	9606.ENSP00000223129	0	0	0	0	0.24	0	0.9	0.065	0.922
APITD1	NUP107	9606.ENSP00000308583	9606.ENSP00000229179	0	0	0	0	0.062	0	0.9	0.194	0.917
APITD1	FANCE	9606.ENSP00000308583	9606.ENSP00000229769	0	0	0	0	0	0.993	0.9	0.558	0.999
APITD1	NUP85	9606.ENSP00000308583	9606.ENSP00000245544	0	0	0	0	0.063	0	0.9	0	0.902
APITD1	RPA1	9606.ENSP00000308583	9606.ENSP00000254719	0	0	0	0	0.082	0.993	0.9	0.069	0.999
APITD1	CCNB1	9606.ENSP00000308583	9606.ENSP00000256442	0	0	0	0	0.171	0	0.9	0.246	0.932
APITD1	ESPL1	9606.ENSP00000308583	9606.ENSP00000257934	0	0	0	0	0.081	0	0.9	0.227	0.922
APITD1	NUP133	9606.ENSP00000308583	9606.ENSP00000261396	0	0	0	0	0.061	0	0.9	0.15	0.913
APITD1	NDC80	9606.ENSP00000308583	9606.ENSP00000261597	0	0	0	0	0.117	0	0.9	0.607	0.962
APITD1	CENPE	9606.ENSP00000308583	9606.ENSP00000265148	0	0	0	0	0.092	0	0.9	0.699	0.97
APITD1	FANCM	9606.ENSP00000308583	9606.ENSP00000267430	0	0	0	0	0.061	0.998	0.9	0.685	0.999
APITD1	NUF2	9606.ENSP00000308583	9606.ENSP00000271452	0	0	0	0	0.23	0	0.9	0.53	0.96
APITD1	CENPU	9606.ENSP00000308583	9606.ENSP00000281453	0	0	0	0	0.11	0.369	0.9	0.769	0.985
APITD1	SPC25	9606.ENSP00000308583	9606.ENSP00000282074	0	0	0	0	0.098	0	0.9	0.043	0.906
APITD1	BUB1B	9606.ENSP00000308583	9606.ENSP00000287598	0	0	0	0	0.12	0	0.9	0.537	0.955
APITD1	CCNB2	9606.ENSP00000308583	9606.ENSP00000288207	0	0	0	0	0.134	0	0.9	0.241	0.928
APITD1	FANCC	9606.ENSP00000308583	9606.ENSP00000289081	0	0	0	0	0.061	0.993	0.9	0.51	0.999
APITD1	MAD2L1	9606.ENSP00000308583	9606.ENSP00000296509	0	0	0	0	0.193	0	0.9	0.19	0.929
APITD1	PLK1	9606.ENSP00000308583	9606.ENSP00000300093	0	0	0	0	0.113	0	0.9	0.4	0.942
APITD1	BIRC5	9606.ENSP00000308583	9606.ENSP00000301633	0	0	0	0	0.181	0	0.9	0.096	0.919
APITD1	BUB1	9606.ENSP00000308583	9606.ENSP00000302530	0	0	0	0	0.122	0	0.9	0.546	0.956
APITD1	MUS81	9606.ENSP00000308583	9606.ENSP00000307853	0	0	0	0	0.062	0.162	0.9	0.31	0.938
APITD1	HIST1H2BK	9606.ENSP00000308583	9606.ENSP00000349430	0	0	0	0	0.059	0	0.9	0	0.901
APITD1	NUP37	9606.ENSP00000308583	9606.ENSP00000448054	0	0	0	0	0.112	0	0.9	0.043	0.907
APITD1	H2AFX	9606.ENSP00000308583	9606.ENSP00000434024	0	0	0	0	0.076	0	0.9	0.17	0.916
APITD1	SGOL2	9606.ENSP00000308583	9606.ENSP00000350447	0	0	0	0	0.064	0	0.9	0.198	0.918
APITD1	ERCC4	9606.ENSP00000308583	9606.ENSP00000310520	0	0	0	0	0.056	0.162	0.9	0.136	0.922
APITD1	EME1	9606.ENSP00000308583	9606.ENSP00000376952	0	0	0	0	0.09	0	0.9	0.354	0.936
APITD1	CDCA8	9606.ENSP00000308583	9606.ENSP00000362146	0	0	0	0	0.213	0	0.9	0.298	0.94
APITD1	CDC20	9606.ENSP00000308583	9606.ENSP00000361540	0	0	0	0	0.22	0	0.9	0.4	0.949
APITD1	KIF2C	9606.ENSP00000308583	9606.ENSP00000361298	0	0	0	0	0.109	0	0.9	0.623	0.963
APITD1	CENPI	9606.ENSP00000308583	9606.ENSP00000362018	0	0	0	0	0.093	0	0.9	0.832	0.983
APITD1	RMI2	9606.ENSP00000308583	9606.ENSP00000310356	0	0	0	0	0.116	0.993	0	0	0.993
APITD1	BLM	9606.ENSP00000308583	9606.ENSP00000347232	0	0	0	0	0	0.993	0.9	0.05	0.999
ATM	RPA3	9606.ENSP00000278616	9606.ENSP00000223129	0	0	0	0	0	0	0.9	0.444	0.942
ATM	MLH1	9606.ENSP00000278616	9606.ENSP00000231790	0	0	0	0	0.064	0.465	0.9	0.732	0.984
ATM	MSH2	9606.ENSP00000278616	9606.ENSP00000233146	0	0	0	0	0.062	0.529	0.9	0.811	0.99
ATM	MSH6	9606.ENSP00000278616	9606.ENSP00000234420	0	0	0	0	0.095	0.489	0.9	0.802	0.989
ATM	RPA1	9606.ENSP00000278616	9606.ENSP00000254719	0	0	0	0	0	0.516	0.9	0.752	0.986
ATM	CCNA1	9606.ENSP00000278616	9606.ENSP00000255465	0	0	0	0	0.061	0.058	0.9	0.33	0.932
ATM	CDK4	9606.ENSP00000278616	9606.ENSP00000257904	0	0	0	0	0	0.056	0.9	0.665	0.965
ATM	MDM2	9606.ENSP00000278616	9606.ENSP00000258149	0	0	0	0	0.062	0.379	0.9	0.86	0.99
ATM	TIPIN	9606.ENSP00000278616	9606.ENSP00000261881	0	0	0	0	0	0.157	0.9	0.669	0.969
ATM	MSH3	9606.ENSP00000278616	9606.ENSP00000265081	0	0	0	0	0.063	0.085	0.72	0.68	0.913
ATM	CDK2	9606.ENSP00000278616	9606.ENSP00000266970	0	0	0	0	0	0.058	0.9	0.744	0.973
ATM	TP53	9606.ENSP00000278616	9606.ENSP00000269305	0	0	0	0	0	0.563	0.9	0.984	0.999
ATM	CCNA2	9606.ENSP00000278616	9606.ENSP00000274026	0	0	0	0	0.061	0.058	0.9	0.755	0.975
ATM	HIST1H2BK	9606.ENSP00000278616	9606.ENSP00000349430	0	0	0	0	0	0	0.9	0.082	0.904
ATM	RMI2	9606.ENSP00000278616	9606.ENSP00000310356	0	0	0	0	0	0	0.9	0.25	0.921
ATM	POLH	9606.ENSP00000278616	9606.ENSP00000361310	0	0	0	0	0.087	0	0.9	0.289	0.929
ATM	EME1	9606.ENSP00000278616	9606.ENSP00000376952	0	0	0	0	0.055	0	0.9	0.598	0.958
ATM	ERCC4	9606.ENSP00000278616	9606.ENSP00000310520	0	0	0	0	0.063	0	0.9	0.663	0.965
ATM	TIMELESS	9606.ENSP00000278616	9606.ENSP00000450607	0	0	0	0	0.063	0.157	0.9	0.669	0.97
ATM	E2F1	9606.ENSP00000278616	9606.ENSP00000345571	0	0	0	0	0.064	0.294	0.9	0.687	0.976
ATM	MUS81	9606.ENSP00000278616	9606.ENSP00000307853	0	0	0	0	0.064	0	0.9	0.788	0.978
ATM	CLSPN	9606.ENSP00000278616	9606.ENSP00000312995	0	0	0	0	0.063	0	0.9	0.795	0.979
ATM	BLM	9606.ENSP00000278616	9606.ENSP00000347232	0	0	0	0	0.093	0.529	0.9	0.782	0.989
ATM	WRN	9606.ENSP00000278616	9606.ENSP00000298139	0	0	0	0	0.15	0.577	0.9	0.899	0.995
ATM	H2AFX	9606.ENSP00000278616	9606.ENSP00000434024	0	0	0	0	0	0.437	0.9	0.972	0.998
AURKA	RBX1	9606.ENSP00000216911	9606.ENSP00000216225	0	0	0	0	0.062	0	0.9	0.154	0.913
AURKA	CDKN1B	9606.ENSP00000216911	9606.ENSP00000228872	0	0	0	0	0	0.873	0	0.316	0.909
AURKA	CDC45	9606.ENSP00000216911	9606.ENSP00000405726	0	0	0	0	0.89	0	0	0.2	0.909
AURKA	PBK	9606.ENSP00000216911	9606.ENSP00000428489	0	0	0	0	0.877	0.065	0	0.337	0.917
AURKA	EP300	9606.ENSP00000216911	9606.ENSP00000263253	0	0	0	0	0	0	0.9	0.211	0.917
AURKA	SKP1	9606.ENSP00000216911	9606.ENSP00000231487	0	0	0	0	0.063	0.101	0.9	0.266	0.929
AURKA	CDK2	9606.ENSP00000216911	9606.ENSP00000266970	0	0	0.431	0.76	0.303	0.88	0	0.587	0.932
AURKA	HAUS8	9606.ENSP00000216911	9606.ENSP00000253669	0	0	0	0	0.139	0	0.9	0.306	0.935
AURKA	RACGAP1	9606.ENSP00000216911	9606.ENSP00000404190	0	0	0	0	0.874	0	0	0.523	0.937
AURKA	FBXO5	9606.ENSP00000216911	9606.ENSP00000229758	0	0	0	0	0.922	0	0	0.375	0.949
AURKA	NEDD1	9606.ENSP00000216911	9606.ENSP00000451211	0	0	0	0	0.159	0	0.9	0.548	0.958
AURKA	KIF4A	9606.ENSP00000216911	9606.ENSP00000363524	0	0	0	0	0.921	0.125	0	0.498	0.962
AURKA	CENPE	9606.ENSP00000216911	9606.ENSP00000265148	0	0	0	0	0.887	0.189	0	0.64	0.964
AURKA	BUB1B	9606.ENSP00000216911	9606.ENSP00000287598	0	0	0	0	0.844	0.246	0	0.747	0.967
AURKA	KIF23	9606.ENSP00000216911	9606.ENSP00000260363	0	0	0	0	0.919	0.125	0	0.665	0.974
AURKA	KIF2C	9606.ENSP00000216911	9606.ENSP00000361298	0	0	0	0	0.868	0.433	0	0.76	0.98
AURKA	MAD2L1	9606.ENSP00000216911	9606.ENSP00000296509	0	0	0	0	0.923	0.169	0	0.724	0.981
AURKA	CDCA8	9606.ENSP00000216911	9606.ENSP00000362146	0	0	0	0	0.933	0	0.54	0.586	0.986
AURKA	CCNA2	9606.ENSP00000216911	9606.ENSP00000274026	0	0	0	0	0.964	0.177	0	0.582	0.986
AURKA	NDC80	9606.ENSP00000216911	9606.ENSP00000261597	0	0	0	0	0.909	0.484	0	0.774	0.988
AURKA	PLK4	9606.ENSP00000216911	9606.ENSP00000270861	0	0	0	0.81	0.812	0.342	0.9	0.66	0.988
AURKA	CCNB1	9606.ENSP00000216911	9606.ENSP00000256442	0	0	0	0	0.925	0.291	0	0.858	0.991
AURKA	BUB1	9606.ENSP00000216911	9606.ENSP00000302530	0	0	0	0	0.962	0.246	0	0.783	0.993
AURKA	TP53	9606.ENSP00000216911	9606.ENSP00000269305	0	0	0	0	0.095	0.379	0.9	0.931	0.995
AURKA	PLK1	9606.ENSP00000216911	9606.ENSP00000300093	0	0	0	0.749	0.947	0.594	0.9	0.917	0.998
AURKA	BIRC5	9606.ENSP00000216911	9606.ENSP00000301633	0	0	0	0	0.869	0.56	0.9	0.711	0.998
AURKA	DLGAP5	9606.ENSP00000216911	9606.ENSP00000247191	0	0	0	0	0.946	0.387	0.9	0.736	0.999
AURKA	CDC20	9606.ENSP00000216911	9606.ENSP00000361540	0	0	0	0	0.977	0.379	0.9	0.743	0.999
AURKA	CCNB2	9606.ENSP00000216911	9606.ENSP00000288207	0	0	0	0	0.973	0.896	0	0.696	0.999
AURKA	TPX2	9606.ENSP00000216911	9606.ENSP00000300403	0	0	0	0	0.952	0.982	0.9	0.886	0.999
AXL	KDR	9606.ENSP00000301178	9606.ENSP00000263923	0	0	0	0.602	0.061	0.096	0.9	0.587	0.928
BCL2L1	HRK	9606.ENSP00000302564	9606.ENSP00000257572	0	0	0	0	0	0.613	0	0.756	0.901
BCL2L1	TP53	9606.ENSP00000302564	9606.ENSP00000269305	0	0	0	0	0.05	0.912	0.9	0.967	0.999
BCL2L1	CFLAR	9606.ENSP00000302564	9606.ENSP00000312455	0	0	0	0	0.055	0.387	0	0.877	0.923
BIRC5	RBX1	9606.ENSP00000301633	9606.ENSP00000216225	0	0	0	0	0.082	0	0.9	0.17	0.917
BIRC5	NUP107	9606.ENSP00000301633	9606.ENSP00000229179	0	0	0	0	0.142	0	0.9	0	0.91
BIRC5	NUP155	9606.ENSP00000301633	9606.ENSP00000231498	0	0	0	0	0.166	0	0.9	0.064	0.915
BIRC5	NUP85	9606.ENSP00000301633	9606.ENSP00000245544	0	0	0	0	0.127	0	0.9	0	0.909
BIRC5	DLGAP5	9606.ENSP00000301633	9606.ENSP00000247191	0	0	0	0	0.913	0	0	0.44	0.949
BIRC5	CCNB1	9606.ENSP00000301633	9606.ENSP00000256442	0	0	0	0	0.888	0.185	0.9	0.651	0.996
BIRC5	ESPL1	9606.ENSP00000301633	9606.ENSP00000257934	0	0	0	0	0.869	0	0.9	0.308	0.99
BIRC5	KIF23	9606.ENSP00000301633	9606.ENSP00000260363	0	0	0	0	0.728	0	0.9	0.451	0.983
BIRC5	NUP133	9606.ENSP00000301633	9606.ENSP00000261396	0	0	0	0	0.063	0	0.9	0	0.902
BIRC5	NDC80	9606.ENSP00000301633	9606.ENSP00000261597	0	0	0	0	0.926	0	0.9	0.325	0.994
BIRC5	CENPE	9606.ENSP00000301633	9606.ENSP00000265148	0	0	0	0	0.768	0.05	0.9	0.406	0.985
BIRC5	TP53	9606.ENSP00000301633	9606.ENSP00000269305	0	0	0	0	0.088	0	0.9	0.571	0.957
BIRC5	NUF2	9606.ENSP00000301633	9606.ENSP00000271452	0	0	0	0	0.85	0	0.9	0.376	0.989
BIRC5	CCNA2	9606.ENSP00000301633	9606.ENSP00000274026	0	0	0	0	0.921	0.157	0	0.522	0.965
BIRC5	CENPU	9606.ENSP00000301633	9606.ENSP00000281453	0	0	0	0	0.609	0	0.9	0.165	0.964
BIRC5	SPC25	9606.ENSP00000301633	9606.ENSP00000282074	0	0	0	0	0.746	0	0.9	0.086	0.974
BIRC5	BUB1B	9606.ENSP00000301633	9606.ENSP00000287598	0	0	0	0	0.916	0.185	0.9	0.554	0.996
BIRC5	CCNB2	9606.ENSP00000301633	9606.ENSP00000288207	0	0	0	0	0.88	0.185	0.9	0.577	0.995
BIRC5	MAD2L1	9606.ENSP00000301633	9606.ENSP00000296509	0	0	0	0	0.958	0	0.9	0.578	0.998
BIRC5	PLK1	9606.ENSP00000301633	9606.ENSP00000300093	0	0	0	0	0.821	0	0.9	0.557	0.991
BIRC5	TPX2	9606.ENSP00000301633	9606.ENSP00000300403	0	0	0	0	0.932	0	0	0.47	0.962
BIRC5	CKS2	9606.ENSP00000301633	9606.ENSP00000364976	0	0	0	0	0.838	0	0	0.441	0.905
BIRC5	NUP37	9606.ENSP00000301633	9606.ENSP00000448054	0	0	0	0	0.229	0	0.9	0.066	0.921
BIRC5	SGOL2	9606.ENSP00000301633	9606.ENSP00000350447	0	0	0	0	0.352	0	0.9	0.116	0.937
BIRC5	CENPI	9606.ENSP00000301633	9606.ENSP00000362018	0	0	0	0	0.401	0	0.9	0.076	0.939
BIRC5	KIF4A	9606.ENSP00000301633	9606.ENSP00000363524	0	0	0	0	0.907	0	0	0.471	0.948
BIRC5	PBK	9606.ENSP00000301633	9606.ENSP00000428489	0	0	0	0	0.952	0.176	0	0.416	0.974
BIRC5	RACGAP1	9606.ENSP00000301633	9606.ENSP00000404190	0	0	0	0	0.783	0	0.9	0.418	0.986
BIRC5	KIF2C	9606.ENSP00000301633	9606.ENSP00000361298	0	0	0	0	0.872	0	0.9	0.447	0.992
BIRC5	BUB1	9606.ENSP00000301633	9606.ENSP00000302530	0	0	0	0	0.901	0.185	0.9	0.592	0.996
BIRC5	CDC20	9606.ENSP00000301633	9606.ENSP00000361540	0	0	0	0	0.965	0.064	0.9	0.61	0.998
BIRC5	CDCA8	9606.ENSP00000301633	9606.ENSP00000362146	0	0	0	0	0.948	0.873	0.9	0.608	0.999
BLM	RPA3	9606.ENSP00000347232	9606.ENSP00000223129	0	0	0	0	0.132	0.993	0.9	0.173	0.999
BLM	FANCE	9606.ENSP00000347232	9606.ENSP00000229769	0	0	0	0	0	0	0.9	0.623	0.96
BLM	MLH1	9606.ENSP00000347232	9606.ENSP00000231790	0.046	0	0	0	0.176	0.994	0.9	0.746	0.999
BLM	MSH6	9606.ENSP00000347232	9606.ENSP00000234420	0.051	0	0	0	0.232	0.631	0	0.702	0.909
BLM	RPA1	9606.ENSP00000347232	9606.ENSP00000254719	0	0	0	0	0.092	0.997	0.9	0.72	0.999
BLM	CDK4	9606.ENSP00000347232	9606.ENSP00000257904	0	0	0	0	0.082	0.172	0.9	0.116	0.923
BLM	TIPIN	9606.ENSP00000347232	9606.ENSP00000261881	0	0	0	0	0.348	0.719	0.9	0.511	0.989
BLM	CDK2	9606.ENSP00000347232	9606.ENSP00000266970	0	0	0	0	0.127	0.26	0.9	0.363	0.953
BLM	FANCM	9606.ENSP00000347232	9606.ENSP00000267430	0	0	0	0	0.176	0.997	0.9	0.742	0.999
BLM	TP53	9606.ENSP00000347232	9606.ENSP00000269305	0	0	0	0	0.069	0.387	0.9	0.312	0.955
BLM	FANCC	9606.ENSP00000347232	9606.ENSP00000289081	0	0	0	0	0	0	0.9	0.628	0.961
BLM	WRN	9606.ENSP00000347232	9606.ENSP00000298139	0	0	0.421	0.583	0.119	0.475	0.9	0.846	0.972
BLM	MUS81	9606.ENSP00000347232	9606.ENSP00000307853	0	0	0	0	0.109	0.739	0.9	0.819	0.995
BLM	RMI2	9606.ENSP00000347232	9606.ENSP00000310356	0	0	0	0	0.26	0.537	0.9	0.544	0.982
BLM	ERCC4	9606.ENSP00000347232	9606.ENSP00000310520	0	0	0	0	0.097	0.39	0.9	0.689	0.98
BLM	CLSPN	9606.ENSP00000347232	9606.ENSP00000312995	0	0	0	0	0.268	0	0.9	0.24	0.939
BLM	HIST1H2BK	9606.ENSP00000347232	9606.ENSP00000349430	0	0	0	0	0	0.081	0.9	0	0.904
BLM	POLH	9606.ENSP00000347232	9606.ENSP00000361310	0.052	0	0	0	0.124	0	0.9	0.249	0.929
BLM	H2AFX	9606.ENSP00000347232	9606.ENSP00000434024	0	0	0	0	0.114	0.481	0.9	0.47	0.972
BLM	TIMELESS	9606.ENSP00000347232	9606.ENSP00000450607	0	0	0	0	0.294	0.302	0.9	0.616	0.978
BLM	EME1	9606.ENSP00000347232	9606.ENSP00000376952	0	0	0	0	0.203	0.33	0.9	0.778	0.986
BMP1	COL5A3	9606.ENSP00000305714	9606.ENSP00000264828	0	0	0	0	0.095	0.064	0.9	0.151	0.918
BMP1	HSPG2	9606.ENSP00000305714	9606.ENSP00000363827	0	0	0	0	0.154	0.379	0.9	0.44	0.966
BRAF	VCL	9606.ENSP00000288602	9606.ENSP00000211998	0	0	0	0	0	0	0.9	0.09	0.905
BRAF	ZC3HAV1	9606.ENSP00000288602	9606.ENSP00000242351	0	0	0	0	0	0	0.9	0	0.9
BRAF	TLN1	9606.ENSP00000288602	9606.ENSP00000316029	0	0	0	0	0	0	0.9	0	0.9
BRAF	FN1	9606.ENSP00000288602	9606.ENSP00000346839	0	0	0	0	0.064	0.261	0.9	0.144	0.932
BRAF	MAP2K1	9606.ENSP00000288602	9606.ENSP00000302486	0	0	0	0.577	0.083	0.994	0.9	0.882	0.999
BUB1	CDC6	9606.ENSP00000302530	9606.ENSP00000209728	0	0	0	0	0.871	0.177	0	0.633	0.957
BUB1	MCM5	9606.ENSP00000302530	9606.ENSP00000216122	0	0	0	0	0.933	0.054	0	0.364	0.956
BUB1	NUP107	9606.ENSP00000302530	9606.ENSP00000229179	0	0	0	0	0.203	0	0.9	0.471	0.954
BUB1	NUP85	9606.ENSP00000302530	9606.ENSP00000245544	0	0	0	0	0.148	0	0.9	0.115	0.918
BUB1	DLGAP5	9606.ENSP00000302530	9606.ENSP00000247191	0	0	0	0	0.972	0	0	0.793	0.994
BUB1	CCNB1	9606.ENSP00000302530	9606.ENSP00000256442	0	0	0	0	0.902	0.085	0.9	0.793	0.997
BUB1	ESPL1	9606.ENSP00000302530	9606.ENSP00000257934	0	0	0	0	0.914	0	0.9	0.847	0.998
BUB1	KIF23	9606.ENSP00000302530	9606.ENSP00000260363	0	0	0	0	0.972	0.185	0	0.496	0.987
BUB1	NUP133	9606.ENSP00000302530	9606.ENSP00000261396	0	0	0	0	0.121	0	0.9	0.21	0.924
BUB1	NDC80	9606.ENSP00000302530	9606.ENSP00000261597	0	0	0	0	0.969	0.945	0.9	0.838	0.999
BUB1	MCM4	9606.ENSP00000302530	9606.ENSP00000262105	0	0	0	0	0.966	0.05	0	0.417	0.979
BUB1	MCM6	9606.ENSP00000302530	9606.ENSP00000264156	0	0	0	0	0.844	0.056	0	0.419	0.907
BUB1	CENPE	9606.ENSP00000302530	9606.ENSP00000265148	0	0	0	0	0.941	0.525	0.9	0.87	0.999
BUB1	PLK4	9606.ENSP00000302530	9606.ENSP00000270861	0	0	0	0	0.844	0.247	0	0.531	0.94
BUB1	NUF2	9606.ENSP00000302530	9606.ENSP00000271452	0	0	0	0	0.891	0.939	0.9	0.777	0.999
BUB1	CCNA2	9606.ENSP00000302530	9606.ENSP00000274026	0	0	0	0	0.97	0.079	0	0.698	0.99
BUB1	CENPU	9606.ENSP00000302530	9606.ENSP00000281453	0	0	0	0	0.787	0	0.9	0.5	0.988
BUB1	SPC25	9606.ENSP00000302530	9606.ENSP00000282074	0	0	0	0	0.662	0.929	0.9	0.149	0.997
BUB1	BUB1B	9606.ENSP00000302530	9606.ENSP00000287598	0	0	0	0.582	0.918	0.929	0.9	0.896	0.999
BUB1	CCNB2	9606.ENSP00000302530	9606.ENSP00000288207	0	0	0	0	0.974	0.085	0.9	0.793	0.999
BUB1	MAD2L1	9606.ENSP00000302530	9606.ENSP00000296509	0	0	0	0	0.921	0.998	0.9	0.858	0.999
BUB1	PLK1	9606.ENSP00000302530	9606.ENSP00000300093	0	0	0	0	0.908	0.593	0.9	0.92	0.999
BUB1	TPX2	9606.ENSP00000302530	9606.ENSP00000300403	0	0	0	0	0.974	0	0	0.518	0.987
BUB1	NUP37	9606.ENSP00000302530	9606.ENSP00000448054	0	0	0	0	0.343	0	0.9	0.054	0.932
BUB1	CDC45	9606.ENSP00000302530	9606.ENSP00000405726	0	0	0	0	0.915	0.062	0	0.443	0.952
BUB1	RACGAP1	9606.ENSP00000302530	9606.ENSP00000404190	0	0	0	0	0.956	0	0	0.297	0.968
BUB1	PBK	9606.ENSP00000302530	9606.ENSP00000428489	0	0	0	0	0.945	0.064	0	0.44	0.968
BUB1	CENPI	9606.ENSP00000302530	9606.ENSP00000362018	0	0	0	0	0.518	0	0.9	0.679	0.983
BUB1	KIF4A	9606.ENSP00000302530	9606.ENSP00000363524	0	0	0	0	0.959	0.185	0	0.537	0.983
BUB1	SGOL2	9606.ENSP00000302530	9606.ENSP00000350447	0	0	0	0	0.707	0	0.9	0.659	0.989
BUB1	CDCA8	9606.ENSP00000302530	9606.ENSP00000362146	0	0	0	0	0.935	0	0.9	0.707	0.997
BUB1	KIF2C	9606.ENSP00000302530	9606.ENSP00000361298	0	0	0	0	0.945	0.185	0.9	0.699	0.998
BUB1	CDC20	9606.ENSP00000302530	9606.ENSP00000361540	0	0	0	0	0.968	0.998	0.9	0.959	0.999
BUB1B	CDC6	9606.ENSP00000287598	9606.ENSP00000209728	0	0	0	0	0.806	0.177	0	0.571	0.925
BUB1B	NUP107	9606.ENSP00000287598	9606.ENSP00000229179	0	0	0	0	0.193	0	0.9	0.472	0.953
BUB1B	NUP85	9606.ENSP00000287598	9606.ENSP00000245544	0	0	0	0	0.143	0	0.9	0.087	0.914
BUB1B	DLGAP5	9606.ENSP00000287598	9606.ENSP00000247191	0	0	0	0	0.945	0	0	0.597	0.977
BUB1B	CCNA1	9606.ENSP00000287598	9606.ENSP00000255465	0	0	0	0	0.631	0.079	0.9	0.255	0.971
BUB1B	CCNB1	9606.ENSP00000287598	9606.ENSP00000256442	0	0	0	0	0.941	0.085	0.9	0.781	0.998
BUB1B	ESPL1	9606.ENSP00000287598	9606.ENSP00000257934	0	0	0	0	0.92	0	0.9	0.834	0.998
BUB1B	KIF23	9606.ENSP00000287598	9606.ENSP00000260363	0	0	0	0	0.891	0.185	0	0.375	0.94
BUB1B	NUP133	9606.ENSP00000287598	9606.ENSP00000261396	0	0	0	0	0.1	0	0.9	0.126	0.914
BUB1B	NDC80	9606.ENSP00000287598	9606.ENSP00000261597	0	0	0	0	0.926	0.399	0.9	0.846	0.999
BUB1B	MCM4	9606.ENSP00000287598	9606.ENSP00000262105	0	0	0	0	0.894	0.05	0	0.276	0.92
BUB1B	CENPE	9606.ENSP00000287598	9606.ENSP00000265148	0	0	0	0	0.919	0.525	0.9	0.921	0.999
BUB1B	PLK4	9606.ENSP00000287598	9606.ENSP00000270861	0	0	0	0	0.75	0.247	0	0.572	0.912
BUB1B	NUF2	9606.ENSP00000287598	9606.ENSP00000271452	0	0	0	0	0.798	0.326	0.9	0.745	0.996
BUB1B	CCNA2	9606.ENSP00000287598	9606.ENSP00000274026	0	0	0	0	0.934	0.993	0.9	0.689	0.999
BUB1B	CENPU	9606.ENSP00000287598	9606.ENSP00000281453	0	0	0	0	0.783	0	0.9	0.499	0.988
BUB1B	SPC25	9606.ENSP00000287598	9606.ENSP00000282074	0	0	0	0	0.789	0	0.9	0.126	0.98
BUB1B	NUP37	9606.ENSP00000287598	9606.ENSP00000448054	0	0	0	0	0.236	0	0.9	0.175	0.931
BUB1B	TPX2	9606.ENSP00000287598	9606.ENSP00000300403	0	0	0	0	0.902	0	0	0.5	0.949
BUB1B	RACGAP1	9606.ENSP00000287598	9606.ENSP00000404190	0	0	0	0	0.925	0	0	0.443	0.956
BUB1B	KIF4A	9606.ENSP00000287598	9606.ENSP00000363524	0	0	0	0	0.932	0.185	0	0.46	0.967
BUB1B	PBK	9606.ENSP00000287598	9606.ENSP00000428489	0	0	0	0	0.942	0.064	0	0.473	0.969
BUB1B	CENPI	9606.ENSP00000287598	9606.ENSP00000362018	0	0	0	0	0.363	0	0.9	0.63	0.974
BUB1B	SGOL2	9606.ENSP00000287598	9606.ENSP00000350447	0	0	0	0	0.524	0	0.9	0.554	0.976
BUB1B	CDCA8	9606.ENSP00000287598	9606.ENSP00000362146	0	0	0	0	0.927	0	0.9	0.637	0.997
BUB1B	CCNB2	9606.ENSP00000287598	9606.ENSP00000288207	0	0	0	0	0.93	0.085	0.9	0.699	0.997
BUB1B	KIF2C	9606.ENSP00000287598	9606.ENSP00000361298	0	0	0	0	0.923	0.185	0.9	0.672	0.997
BUB1B	PLK1	9606.ENSP00000287598	9606.ENSP00000300093	0	0	0	0	0.67	0.534	0.9	0.924	0.998
BUB1B	CDC20	9606.ENSP00000287598	9606.ENSP00000361540	0	0	0	0	0.953	0.999	0.9	0.963	0.999
BUB1B	MAD2L1	9606.ENSP00000287598	9606.ENSP00000296509	0	0	0	0	0.849	0.999	0.9	0.909	0.999
CASP10	TNFRSF10A	9606.ENSP00000286186	9606.ENSP00000221132	0	0	0	0	0	0.993	0.9	0.724	0.999
CASP10	TNFSF10	9606.ENSP00000286186	9606.ENSP00000241261	0	0	0	0	0.095	0.305	0.9	0.622	0.973
CASP10	TP53	9606.ENSP00000286186	9606.ENSP00000269305	0	0	0	0	0.098	0	0.9	0.608	0.961
CASP10	TNFRSF10B	9606.ENSP00000286186	9606.ENSP00000276431	0	0	0	0	0	0.993	0.9	0.686	0.999
CASP10	CASP7	9606.ENSP00000286186	9606.ENSP00000358327	0	0	0	0.761	0.063	0.86	0.9	0.771	0.988
CASP10	CFLAR	9606.ENSP00000286186	9606.ENSP00000312455	0	0	0	0.618	0.118	0.86	0.9	0.704	0.99
CASP7	CLSPN	9606.ENSP00000358327	9606.ENSP00000312995	0	0	0	0	0.061	0.379	0.9	0.172	0.945
CASP7	VIM	9606.ENSP00000358327	9606.ENSP00000446007	0	0	0	0	0.061	0.364	0.9	0.062	0.936
CAV1	TNFRSF1A	9606.ENSP00000339191	9606.ENSP00000162749	0	0	0	0	0.11	0.348	0.9	0.253	0.95
CAV1	TFAP2B	9606.ENSP00000339191	9606.ENSP00000377265	0	0	0	0	0.062	0	0.9	0	0.902
CAV1	TGFBR2	9606.ENSP00000339191	9606.ENSP00000351905	0	0	0	0	0.125	0.057	0.9	0.291	0.933
CCNA1	CDC6	9606.ENSP00000255465	9606.ENSP00000209728	0	0	0	0	0.52	0.351	0.9	0.6	0.985
CCNA1	MCM5	9606.ENSP00000255465	9606.ENSP00000216122	0	0	0	0	0.518	0.182	0.9	0.46	0.975
CCNA1	MYBL2	9606.ENSP00000255465	9606.ENSP00000217026	0	0	0	0	0.172	0.434	0.8	0.289	0.924
CCNA1	ORC6	9606.ENSP00000255465	9606.ENSP00000219097	0	0	0	0	0.11	0	0.9	0.175	0.92
CCNA1	CCND1	9606.ENSP00000255465	9606.ENSP00000227507	0	0	0	0.678	0.061	0.065	0.9	0.706	0.925
CCNA1	CDKN1B	9606.ENSP00000255465	9606.ENSP00000228872	0	0	0	0	0.058	0.597	0.9	0.455	0.976
CCNA1	SKP1	9606.ENSP00000255465	9606.ENSP00000231487	0	0	0	0	0.055	0.264	0.9	0.248	0.94
CCNA1	ORC2	9606.ENSP00000255465	9606.ENSP00000234296	0	0	0	0	0.142	0.487	0.9	0.526	0.976
CCNA1	HIST1H2BK	9606.ENSP00000255465	9606.ENSP00000349430	0	0	0	0	0.063	0.062	0.9	0.083	0.908
CCNA1	ORC3	9606.ENSP00000255465	9606.ENSP00000257789	0	0	0	0	0.098	0.129	0.9	0.091	0.919
CCNA1	H2AFX	9606.ENSP00000255465	9606.ENSP00000434024	0	0	0	0	0.061	0.058	0.9	0.228	0.922
CCNA1	ORC5	9606.ENSP00000255465	9606.ENSP00000297431	0	0	0	0	0.085	0	0.9	0.238	0.924
CCNA1	CCNA2	9606.ENSP00000255465	9606.ENSP00000274026	0	0	0	0.915	0.064	0.21	0.9	0.718	0.924
CCNA1	CCND2	9606.ENSP00000255465	9606.ENSP00000261254	0	0	0	0.672	0.062	0.065	0.9	0.695	0.925
CCNA1	MDM2	9606.ENSP00000255465	9606.ENSP00000258149	0	0	0	0	0.062	0.108	0.9	0.288	0.932
CCNA1	CCNE1	9606.ENSP00000255465	9606.ENSP00000262643	0	0	0	0.643	0.199	0.168	0.9	0.746	0.946
CCNA1	MCM2	9606.ENSP00000255465	9606.ENSP00000265056	0	0	0	0	0.241	0.211	0.9	0.334	0.954
CCNA1	SKP2	9606.ENSP00000255465	9606.ENSP00000274255	0	0	0	0	0.077	0.424	0.9	0.272	0.956
CCNA1	CKS1B	9606.ENSP00000255465	9606.ENSP00000311083	0	0	0	0	0.229	0.41	0.9	0.18	0.957
CCNA1	MAD2L1	9606.ENSP00000255465	9606.ENSP00000296509	0	0	0	0	0.428	0.102	0.9	0.329	0.96
CCNA1	MCM7	9606.ENSP00000255465	9606.ENSP00000307288	0	0	0	0	0.428	0.182	0.9	0.277	0.961
CCNA1	RB1	9606.ENSP00000255465	9606.ENSP00000267163	0	0	0	0	0.108	0.409	0.9	0.371	0.962
CCNA1	CDT1	9606.ENSP00000255465	9606.ENSP00000301019	0	0	0	0	0.191	0.379	0.9	0.343	0.962
CCNA1	CCNB1	9606.ENSP00000255465	9606.ENSP00000256442	0	0	0	0.744	0.557	0.086	0.9	0.771	0.964
CCNA1	E2F1	9606.ENSP00000255465	9606.ENSP00000345571	0	0	0	0	0.129	0.47	0.9	0.422	0.969
CCNA1	TP53	9606.ENSP00000255465	9606.ENSP00000269305	0	0	0	0	0.063	0.123	0.9	0.695	0.971
CCNA1	MCM4	9606.ENSP00000255465	9606.ENSP00000262105	0	0	0	0	0.171	0.895	0.9	0.284	0.992
CCNA1	MCM6	9606.ENSP00000255465	9606.ENSP00000264156	0	0	0	0	0.172	0.911	0.9	0.272	0.993
CCNA1	CDC20	9606.ENSP00000255465	9606.ENSP00000361540	0	0	0	0	0.788	0.472	0.9	0.47	0.993
CCNA1	CDK2	9606.ENSP00000255465	9606.ENSP00000266970	0	0.004	0	0	0.144	0.796	0.9	0.724	0.994
CCNA1	CDKN1A	9606.ENSP00000255465	9606.ENSP00000384849	0	0	0	0	0.058	0.994	0.9	0.455	0.999
CCNA2	CDC6	9606.ENSP00000274026	9606.ENSP00000209728	0	0	0	0	0.906	0.92	0.9	0.876	0.999
CCNA2	MCM5	9606.ENSP00000274026	9606.ENSP00000216122	0	0	0	0	0.749	0.182	0.9	0.541	0.989
CCNA2	MYBL2	9606.ENSP00000274026	9606.ENSP00000217026	0	0	0	0	0.593	0.356	0.8	0.745	0.984
CCNA2	ORC6	9606.ENSP00000274026	9606.ENSP00000219097	0	0	0	0	0.385	0	0.9	0.435	0.962
CCNA2	CDKN1B	9606.ENSP00000274026	9606.ENSP00000228872	0	0	0	0	0.058	0.998	0.9	0.843	0.999
CCNA2	FBXO5	9606.ENSP00000274026	9606.ENSP00000229758	0	0	0	0	0.963	0	0	0.632	0.986
CCNA2	SKP1	9606.ENSP00000274026	9606.ENSP00000231487	0	0	0	0	0.055	0.504	0.9	0.566	0.976
CCNA2	ORC2	9606.ENSP00000274026	9606.ENSP00000234296	0	0	0	0	0.142	0.487	0.9	0.461	0.973
CCNA2	DLGAP5	9606.ENSP00000274026	9606.ENSP00000247191	0	0	0	0	0.967	0	0	0.416	0.98
CCNA2	CCNB1	9606.ENSP00000274026	9606.ENSP00000256442	0	0	0	0.738	0.971	0.707	0.72	0.924	0.998
CCNA2	ORC3	9606.ENSP00000274026	9606.ENSP00000257789	0	0	0	0	0.131	0.129	0.9	0.305	0.94
CCNA2	CDK4	9606.ENSP00000274026	9606.ENSP00000257904	0	0.003	0	0	0.184	0.994	0.9	0.857	0.999
CCNA2	ESPL1	9606.ENSP00000274026	9606.ENSP00000257934	0	0	0	0	0.909	0.186	0	0.543	0.963
CCNA2	MDM2	9606.ENSP00000274026	9606.ENSP00000258149	0	0	0	0	0.062	0.108	0.9	0.58	0.96
CCNA2	KIF23	9606.ENSP00000274026	9606.ENSP00000260363	0	0	0	0	0.939	0.15	0	0.431	0.968
CCNA2	CCND2	9606.ENSP00000274026	9606.ENSP00000261254	0	0	0	0.685	0.062	0.065	0.9	0.772	0.927
CCNA2	NDC80	9606.ENSP00000274026	9606.ENSP00000261597	0	0	0	0	0.97	0	0	0.304	0.978
CCNA2	MCM4	9606.ENSP00000274026	9606.ENSP00000262105	0	0	0	0	0.797	0.182	0.9	0.551	0.991
CCNA2	CCNE1	9606.ENSP00000274026	9606.ENSP00000262643	0	0	0	0.645	0.393	0.168	0.9	0.773	0.96
CCNA2	MCM6	9606.ENSP00000274026	9606.ENSP00000264156	0	0	0	0	0.718	0.306	0.9	0.548	0.989
CCNA2	MCM2	9606.ENSP00000274026	9606.ENSP00000265056	0	0	0	0	0.846	0.182	0.9	0.641	0.994
CCNA2	CENPE	9606.ENSP00000274026	9606.ENSP00000265148	0	0	0	0	0.963	0.172	0	0.476	0.982
CCNA2	CDK6	9606.ENSP00000274026	9606.ENSP00000265734	0	0.003	0	0	0.163	0.994	0.72	0.769	0.999
CCNA2	CDK2	9606.ENSP00000274026	9606.ENSP00000266970	0	0.006	0	0	0.403	0.998	0.9	0.973	0.999
CCNA2	RB1	9606.ENSP00000274026	9606.ENSP00000267163	0	0	0	0	0.108	0.451	0.9	0.698	0.983
CCNA2	TP53	9606.ENSP00000274026	9606.ENSP00000269305	0	0	0	0	0.091	0.354	0.9	0.857	0.99
CCNA2	PLK4	9606.ENSP00000274026	9606.ENSP00000270861	0	0	0	0	0.831	0.175	0	0.474	0.92
CCNA2	NUF2	9606.ENSP00000274026	9606.ENSP00000271452	0	0	0	0	0.879	0	0	0.352	0.918
CCNA2	HIST1H2BK	9606.ENSP00000274026	9606.ENSP00000349430	0	0	0	0	0.087	0.062	0.9	0.068	0.909
CCNA2	RACGAP1	9606.ENSP00000274026	9606.ENSP00000404190	0	0	0	0	0.878	0.085	0	0.296	0.914
CCNA2	CDC45	9606.ENSP00000274026	9606.ENSP00000405726	0	0	0	0	0.817	0.07	0	0.563	0.919
CCNA2	ORC5	9606.ENSP00000274026	9606.ENSP00000297431	0	0	0	0	0.107	0	0.9	0.43	0.944
CCNA2	TPX2	9606.ENSP00000274026	9606.ENSP00000300403	0	0	0	0	0.927	0	0	0.417	0.956
CCNA2	KIF4A	9606.ENSP00000274026	9606.ENSP00000363524	0	0	0	0	0.924	0.15	0	0.389	0.957
CCNA2	PBK	9606.ENSP00000274026	9606.ENSP00000428489	0	0	0	0	0.946	0.09	0	0.312	0.963
CCNA2	KIF2C	9606.ENSP00000274026	9606.ENSP00000361298	0	0	0	0	0.932	0.15	0	0.43	0.964
CCNA2	H2AFX	9606.ENSP00000274026	9606.ENSP00000434024	0	0	0	0	0.29	0.058	0.9	0.586	0.968
CCNA2	CCNB2	9606.ENSP00000274026	9606.ENSP00000288207	0	0	0	0.743	0.97	0.086	0	0.806	0.977
CCNA2	CDCA8	9606.ENSP00000274026	9606.ENSP00000362146	0	0	0	0	0.974	0	0	0.427	0.984
CCNA2	E2F1	9606.ENSP00000274026	9606.ENSP00000345571	0	0	0	0	0.313	0.521	0.9	0.714	0.989
CCNA2	MCM7	9606.ENSP00000274026	9606.ENSP00000307288	0	0	0	0	0.719	0.182	0.9	0.654	0.99
CCNA2	SKP2	9606.ENSP00000274026	9606.ENSP00000274255	0	0	0	0	0.368	0.602	0.9	0.702	0.991
CCNA2	CKS2	9606.ENSP00000274026	9606.ENSP00000364976	0	0	0	0	0.838	0.817	0.54	0.509	0.992
CCNA2	PLK1	9606.ENSP00000274026	9606.ENSP00000300093	0	0	0	0	0.979	0.175	0	0.704	0.994
CCNA2	CKS1B	9606.ENSP00000274026	9606.ENSP00000311083	0	0	0	0	0.829	0.801	0.9	0.568	0.998
CCNA2	CDT1	9606.ENSP00000274026	9606.ENSP00000301019	0	0	0	0	0.812	0.808	0.9	0.702	0.998
CCNA2	CDC20	9606.ENSP00000274026	9606.ENSP00000361540	0	0	0	0	0.984	0.994	0.9	0.847	0.999
CCNA2	CDKN1A	9606.ENSP00000274026	9606.ENSP00000384849	0	0	0	0	0.058	0.994	0.9	0.793	0.999
CCNA2	MAD2L1	9606.ENSP00000274026	9606.ENSP00000296509	0	0	0	0	0.984	0.993	0.9	0.572	0.999
CCNB1	CDC6	9606.ENSP00000256442	9606.ENSP00000209728	0	0	0	0	0.809	0.787	0	0.756	0.989
CCNB1	MYBL2	9606.ENSP00000256442	9606.ENSP00000217026	0	0	0	0	0.575	0.185	0.9	0.775	0.991
CCNB1	ORC6	9606.ENSP00000256442	9606.ENSP00000219097	0	0	0	0	0.297	0	0.9	0.345	0.95
CCNB1	CCND1	9606.ENSP00000256442	9606.ENSP00000227507	0	0	0	0.65	0.096	0.064	0.9	0.861	0.935
CCNB1	CDKN1B	9606.ENSP00000256442	9606.ENSP00000228872	0	0	0	0	0	0.994	0	0.649	0.998
CCNB1	NUP107	9606.ENSP00000256442	9606.ENSP00000229179	0	0	0	0	0.183	0	0.9	0.138	0.923
CCNB1	FBXO5	9606.ENSP00000256442	9606.ENSP00000229758	0	0	0	0	0.784	0	0.9	0.553	0.989
CCNB1	NUP155	9606.ENSP00000256442	9606.ENSP00000231498	0	0	0	0	0.231	0.164	0.9	0.055	0.931
CCNB1	ORC2	9606.ENSP00000256442	9606.ENSP00000234296	0	0	0	0	0.086	0.269	0.9	0.238	0.942
CCNB1	NEK9	9606.ENSP00000256442	9606.ENSP00000238616	0	0	0	0	0.063	0.074	0.9	0.195	0.92
CCNB1	NUP85	9606.ENSP00000256442	9606.ENSP00000245544	0	0	0	0	0.13	0	0.9	0.054	0.91
CCNB1	DLGAP5	9606.ENSP00000256442	9606.ENSP00000247191	0	0	0	0	0.976	0	0	0.506	0.987
CCNB1	HIST1H2BK	9606.ENSP00000256442	9606.ENSP00000349430	0	0	0	0	0.084	0.064	0.9	0.115	0.914
CCNB1	MCM4	9606.ENSP00000256442	9606.ENSP00000262105	0	0	0	0	0.781	0.26	0	0.512	0.914
CCNB1	NUP133	9606.ENSP00000256442	9606.ENSP00000261396	0	0	0	0	0.117	0.064	0.9	0.103	0.916
CCNB1	MCM7	9606.ENSP00000256442	9606.ENSP00000307288	0	0	0	0	0.792	0.182	0	0.578	0.921
CCNB1	CDT1	9606.ENSP00000256442	9606.ENSP00000301019	0	0	0	0	0.746	0.354	0	0.577	0.924
CCNB1	ORC5	9606.ENSP00000256442	9606.ENSP00000297431	0	0	0	0	0.242	0	0.9	0.122	0.927
CCNB1	CCND2	9606.ENSP00000256442	9606.ENSP00000261254	0	0	0	0.626	0.077	0.064	0.9	0.741	0.931
CCNB1	ORC3	9606.ENSP00000256442	9606.ENSP00000257789	0	0	0	0	0.171	0.165	0.9	0.132	0.931
CCNB1	MCM2	9606.ENSP00000256442	9606.ENSP00000265056	0	0	0	0	0.804	0.24	0	0.592	0.934
CCNB1	NUP37	9606.ENSP00000256442	9606.ENSP00000448054	0	0	0	0	0.35	0.127	0.9	0.05	0.938
CCNB1	KIF4A	9606.ENSP00000256442	9606.ENSP00000363524	0	0	0	0	0.888	0.15	0	0.463	0.944
CCNB1	CCNE1	9606.ENSP00000256442	9606.ENSP00000262643	0	0	0	0.636	0.368	0	0.9	0.802	0.953
CCNB1	CENPI	9606.ENSP00000256442	9606.ENSP00000362018	0	0	0	0	0.567	0	0.9	0.185	0.961
CCNB1	RACGAP1	9606.ENSP00000256442	9606.ENSP00000404190	0	0	0	0	0.937	0.085	0	0.441	0.965
CCNB1	E2F1	9606.ENSP00000256442	9606.ENSP00000345571	0	0	0	0	0.249	0.169	0.9	0.54	0.967
CCNB1	H2AFX	9606.ENSP00000256442	9606.ENSP00000434024	0	0	0	0	0.285	0.058	0.9	0.616	0.97
CCNB1	TPX2	9606.ENSP00000256442	9606.ENSP00000300403	0	0	0	0	0.946	0	0	0.515	0.972
CCNB1	CENPU	9606.ENSP00000256442	9606.ENSP00000281453	0	0	0	0	0.723	0	0.9	0.238	0.977
CCNB1	KIF23	9606.ENSP00000256442	9606.ENSP00000260363	0	0	0	0	0.941	0.15	0	0.619	0.979
CCNB1	CDK6	9606.ENSP00000256442	9606.ENSP00000265734	0	0	0	0	0.152	0.265	0.9	0.793	0.985
CCNB1	PBK	9606.ENSP00000256442	9606.ENSP00000428489	0	0	0	0	0.937	0.41	0	0.668	0.986
CCNB1	SPC25	9606.ENSP00000256442	9606.ENSP00000282074	0	0	0	0	0.838	0	0.9	0.223	0.986
CCNB1	NUF2	9606.ENSP00000256442	9606.ENSP00000271452	0	0	0	0	0.814	0	0.9	0.447	0.988
CCNB1	SGOL2	9606.ENSP00000256442	9606.ENSP00000350447	0	0	0	0	0.863	0	0.9	0.269	0.989
CCNB1	CDK4	9606.ENSP00000256442	9606.ENSP00000257904	0	0	0	0	0.213	0.265	0.9	0.832	0.989
CCNB1	CENPE	9606.ENSP00000256442	9606.ENSP00000265148	0	0	0	0	0.83	0.15	0.9	0.622	0.993
CCNB1	CDKN1A	9606.ENSP00000256442	9606.ENSP00000384849	0	0	0	0	0	0.774	0.9	0.744	0.993
CCNB1	NDC80	9606.ENSP00000256442	9606.ENSP00000261597	0	0	0	0	0.912	0.387	0.9	0.506	0.996
CCNB1	CKS1B	9606.ENSP00000256442	9606.ENSP00000311083	0	0	0	0	0.81	0.913	0.54	0.569	0.996
CCNB1	KIF2C	9606.ENSP00000256442	9606.ENSP00000361298	0	0	0	0	0.929	0.15	0.9	0.513	0.996
CCNB1	CDCA8	9606.ENSP00000256442	9606.ENSP00000362146	0	0	0	0	0.968	0	0.9	0.544	0.998
CCNB1	MAD2L1	9606.ENSP00000256442	9606.ENSP00000296509	0	0	0	0	0.955	0.13	0.9	0.76	0.998
CCNB1	CDC20	9606.ENSP00000256442	9606.ENSP00000361540	0	0	0	0	0.972	0.997	0.9	0.878	0.999
CCNB1	CCNB2	9606.ENSP00000256442	9606.ENSP00000288207	0	0	0	0.943	0.955	0.945	0.9	0.839	0.999
CCNB1	CDK2	9606.ENSP00000256442	9606.ENSP00000266970	0	0	0	0	0.433	0.974	0.9	0.856	0.999
CCNB1	PLK1	9606.ENSP00000256442	9606.ENSP00000300093	0	0	0	0	0.936	0.772	0.9	0.942	0.999
CCNB1	CKS2	9606.ENSP00000256442	9606.ENSP00000364976	0	0	0	0	0.878	0.95	0.54	0.781	0.999
CCNB1	ESPL1	9606.ENSP00000256442	9606.ENSP00000257934	0	0	0	0	0.629	0.995	0	0.809	0.999
CCNB2	CDC6	9606.ENSP00000288207	9606.ENSP00000209728	0	0	0	0	0.748	0.707	0	0.691	0.975
CCNB2	MYBL2	9606.ENSP00000288207	9606.ENSP00000217026	0	0	0	0	0.604	0.185	0.9	0.482	0.981
CCNB2	CDKN1B	9606.ENSP00000288207	9606.ENSP00000228872	0	0	0	0	0	0.896	0	0.348	0.929
CCNB2	NUP107	9606.ENSP00000288207	9606.ENSP00000229179	0	0	0	0	0.16	0	0.9	0.073	0.915
CCNB2	FBXO5	9606.ENSP00000288207	9606.ENSP00000229758	0	0	0	0	0.921	0	0	0.348	0.946
CCNB2	NUP155	9606.ENSP00000288207	9606.ENSP00000231498	0	0	0	0	0.229	0.164	0.9	0	0.929
CCNB2	NEK9	9606.ENSP00000288207	9606.ENSP00000238616	0	0	0	0	0.063	0.074	0.9	0.076	0.909
CCNB2	NUP85	9606.ENSP00000288207	9606.ENSP00000245544	0	0	0	0	0.113	0	0.9	0.043	0.907
CCNB2	DLGAP5	9606.ENSP00000288207	9606.ENSP00000247191	0	0	0	0	0.976	0	0	0.437	0.986
CCNB2	CDK4	9606.ENSP00000288207	9606.ENSP00000257904	0	0	0	0	0.199	0.265	0.9	0.651	0.976
CCNB2	ESPL1	9606.ENSP00000288207	9606.ENSP00000257934	0	0	0	0	0.919	0.352	0	0.711	0.983
CCNB2	KIF23	9606.ENSP00000288207	9606.ENSP00000260363	0	0	0	0	0.944	0.15	0	0.649	0.982
CCNB2	NUP133	9606.ENSP00000288207	9606.ENSP00000261396	0	0	0	0	0.097	0.064	0.9	0.055	0.909
CCNB2	NDC80	9606.ENSP00000288207	9606.ENSP00000261597	0	0	0	0	0.961	0	0.9	0.578	0.998
CCNB2	MCM4	9606.ENSP00000288207	9606.ENSP00000262105	0	0	0	0	0.817	0.26	0	0.548	0.933
CCNB2	MCM2	9606.ENSP00000288207	9606.ENSP00000265056	0	0	0	0	0.865	0.803	0	0.592	0.988
CCNB2	CENPE	9606.ENSP00000288207	9606.ENSP00000265148	0	0	0	0	0.87	0.15	0.9	0.499	0.993
CCNB2	CDK6	9606.ENSP00000288207	9606.ENSP00000265734	0	0	0	0	0.154	0.265	0.9	0.65	0.975
CCNB2	CDK2	9606.ENSP00000288207	9606.ENSP00000266970	0	0	0	0	0.459	0.995	0.9	0.689	0.999
CCNB2	PLK4	9606.ENSP00000288207	9606.ENSP00000270861	0	0	0	0	0.801	0.175	0	0.499	0.91
CCNB2	NUF2	9606.ENSP00000288207	9606.ENSP00000271452	0	0	0	0	0.872	0	0.9	0.409	0.991
CCNB2	CENPU	9606.ENSP00000288207	9606.ENSP00000281453	0	0	0	0	0.758	0	0.9	0.211	0.979
CCNB2	SPC25	9606.ENSP00000288207	9606.ENSP00000282074	0	0	0	0	0.843	0	0.9	0.184	0.986
CCNB2	CDT1	9606.ENSP00000288207	9606.ENSP00000301019	0	0	0	0	0.867	0	0	0.427	0.92
CCNB2	CDC45	9606.ENSP00000288207	9606.ENSP00000405726	0	0	0	0	0.864	0.08	0	0.537	0.937
CCNB2	NUP37	9606.ENSP00000288207	9606.ENSP00000448054	0	0	0	0	0.35	0.127	0.9	0.05	0.938
CCNB2	MCM7	9606.ENSP00000288207	9606.ENSP00000307288	0	0	0	0	0.845	0.182	0	0.559	0.939
CCNB2	SGOL2	9606.ENSP00000288207	9606.ENSP00000350447	0	0	0	0	0.328	0	0.9	0.186	0.94
CCNB2	CENPI	9606.ENSP00000288207	9606.ENSP00000362018	0	0	0	0	0.4	0	0.9	0.118	0.942
CCNB2	RACGAP1	9606.ENSP00000288207	9606.ENSP00000404190	0	0	0	0	0.934	0.085	0	0.369	0.958
CCNB2	TPX2	9606.ENSP00000288207	9606.ENSP00000300403	0	0	0	0	0.935	0	0	0.426	0.961
CCNB2	KIF4A	9606.ENSP00000288207	9606.ENSP00000363524	0	0	0	0	0.924	0.15	0	0.504	0.965
CCNB2	PBK	9606.ENSP00000288207	9606.ENSP00000428489	0	0	0	0	0.951	0.09	0	0.354	0.968
CCNB2	CKS1B	9606.ENSP00000288207	9606.ENSP00000311083	0	0	0	0	0.868	0.924	0	0.491	0.994
CCNB2	KIF2C	9606.ENSP00000288207	9606.ENSP00000361298	0	0	0	0	0.914	0.15	0.9	0.526	0.996
CCNB2	CDCA8	9606.ENSP00000288207	9606.ENSP00000362146	0	0	0	0	0.938	0	0.9	0.578	0.997
CCNB2	CKS2	9606.ENSP00000288207	9606.ENSP00000364976	0	0	0	0	0.921	0.916	0	0.627	0.997
CCNB2	MAD2L1	9606.ENSP00000288207	9606.ENSP00000296509	0	0	0	0	0.926	0.13	0.9	0.788	0.998
CCNB2	PLK1	9606.ENSP00000288207	9606.ENSP00000300093	0	0	0	0	0.937	0.303	0.9	0.779	0.998
CCNB2	CDC20	9606.ENSP00000288207	9606.ENSP00000361540	0	0	0	0	0.989	0.71	0.9	0.829	0.999
CCND1	HIST1H2BK	9606.ENSP00000227507	9606.ENSP00000349430	0	0	0	0	0	0	0.9	0.053	0.901
CCND1	CCND2	9606.ENSP00000227507	9606.ENSP00000261254	0	0	0	0.961	0.061	0	0.9	0.827	0.905
CCND1	CCNE1	9606.ENSP00000227507	9606.ENSP00000262643	0	0	0	0.67	0.063	0.057	0.9	0.844	0.93
CCND1	RUNX1	9606.ENSP00000227507	9606.ENSP00000300305	0	0	0	0	0	0.379	0.9	0.196	0.945
CCND1	H2AFX	9606.ENSP00000227507	9606.ENSP00000434024	0	0	0	0	0.068	0	0.9	0.512	0.95
CCND1	SKP1	9606.ENSP00000227507	9606.ENSP00000231487	0	0	0	0	0	0.348	0.9	0.45	0.961
CCND1	TP53	9606.ENSP00000227507	9606.ENSP00000269305	0	0	0	0	0.061	0.379	0	0.942	0.963
CCND1	CREBBP	9606.ENSP00000227507	9606.ENSP00000262367	0	0	0	0	0.061	0.336	0.9	0.503	0.964
CCND1	SKP2	9606.ENSP00000227507	9606.ENSP00000274255	0	0	0	0	0.061	0	0.9	0.679	0.967
CCND1	LEF1	9606.ENSP00000227507	9606.ENSP00000265165	0	0	0	0	0.05	0	0.9	0.701	0.969
CCND1	EP300	9606.ENSP00000227507	9606.ENSP00000263253	0	0	0	0	0.061	0.379	0.9	0.559	0.97
CCND1	RUNX3	9606.ENSP00000227507	9606.ENSP00000382800	0	0	0	0	0	0.305	0.9	0.624	0.971
CCND1	CKS1B	9606.ENSP00000227507	9606.ENSP00000311083	0	0	0	0	0.084	0.499	0.9	0.464	0.972
CCND1	E2F1	9606.ENSP00000227507	9606.ENSP00000345571	0	0	0	0	0.064	0.132	0.9	0.713	0.973
CCND1	CDKN2C	9606.ENSP00000227507	9606.ENSP00000262662	0	0	0	0	0.062	0.638	0.9	0.63	0.985
CCND1	RB1	9606.ENSP00000227507	9606.ENSP00000267163	0	0	0	0	0.062	0.522	0.9	0.858	0.992
CCND1	CDKN1B	9606.ENSP00000227507	9606.ENSP00000228872	0	0	0	0	0.061	0.833	0.9	0.827	0.996
CCND1	CDKN1A	9606.ENSP00000227507	9606.ENSP00000384849	0	0	0	0	0.084	0.993	0.9	0.857	0.999
CCND1	CDK2	9606.ENSP00000227507	9606.ENSP00000266970	0	0	0	0	0.089	0.845	0.9	0.96	0.999
CCND1	CDK4	9606.ENSP00000227507	9606.ENSP00000257904	0	0	0	0	0.082	0.994	0.9	0.973	0.999
CCND1	CDK6	9606.ENSP00000227507	9606.ENSP00000265734	0	0	0	0	0.055	0.994	0.9	0.934	0.999
CCND2	CDKN1B	9606.ENSP00000261254	9606.ENSP00000228872	0	0	0	0	0.061	0.87	0.9	0.712	0.996
CCND2	SKP1	9606.ENSP00000261254	9606.ENSP00000231487	0	0	0	0	0	0	0.9	0.262	0.923
CCND2	CDK4	9606.ENSP00000261254	9606.ENSP00000257904	0	0	0	0	0.064	0.918	0.9	0.933	0.999
CCND2	CREBBP	9606.ENSP00000261254	9606.ENSP00000262367	0	0	0	0	0.061	0	0.9	0.223	0.92
CCND2	EP300	9606.ENSP00000261254	9606.ENSP00000263253	0	0	0	0	0.061	0	0.9	0.298	0.928
CCND2	CCNE1	9606.ENSP00000261254	9606.ENSP00000262643	0	0	0	0.645	0.064	0.18	0.9	0.77	0.939
CCND2	RUNX1	9606.ENSP00000261254	9606.ENSP00000300305	0	0	0	0	0.055	0.379	0.9	0.13	0.942
CCND2	SKP2	9606.ENSP00000261254	9606.ENSP00000274255	0	0	0	0	0.062	0	0.9	0.457	0.944
CCND2	CKS1B	9606.ENSP00000261254	9606.ENSP00000311083	0	0	0	0	0.061	0.31	0.9	0.286	0.947
CCND2	E2F1	9606.ENSP00000261254	9606.ENSP00000345571	0	0	0	0	0.041	0.132	0.9	0.517	0.954
CCND2	CDKN2C	9606.ENSP00000261254	9606.ENSP00000262662	0	0	0	0	0.051	0.142	0.9	0.63	0.965
CCND2	RB1	9606.ENSP00000261254	9606.ENSP00000267163	0	0	0	0	0.062	0.522	0.9	0.742	0.986
CCND2	CDK2	9606.ENSP00000261254	9606.ENSP00000266970	0	0	0	0	0.063	0.776	0.9	0.794	0.995
CCND2	CDK6	9606.ENSP00000261254	9606.ENSP00000265734	0	0	0	0	0.064	0.814	0.9	0.842	0.996
CCND2	CDKN1A	9606.ENSP00000261254	9606.ENSP00000384849	0	0	0	0	0.061	0.993	0.9	0.691	0.999
CCNE1	CDC6	9606.ENSP00000262643	9606.ENSP00000209728	0	0	0	0	0.597	0.503	0.9	0.695	0.993
CCNE1	ORC6	9606.ENSP00000262643	9606.ENSP00000219097	0	0	0	0	0.297	0	0.9	0.307	0.947
CCNE1	CDKN1B	9606.ENSP00000262643	9606.ENSP00000228872	0	0	0	0	0.063	0.994	0.9	0.736	0.999
CCNE1	SKP1	9606.ENSP00000262643	9606.ENSP00000231487	0	0	0	0	0.051	0.264	0.9	0.551	0.964
CCNE1	ORC2	9606.ENSP00000262643	9606.ENSP00000234296	0	0	0	0	0.064	0.26	0.9	0.396	0.952
CCNE1	ORC3	9606.ENSP00000262643	9606.ENSP00000257789	0	0	0	0	0.065	0.129	0.9	0.257	0.931
CCNE1	CDK4	9606.ENSP00000262643	9606.ENSP00000257904	0	0	0	0	0.143	0.994	0.9	0.824	0.999
CCNE1	ORC5	9606.ENSP00000262643	9606.ENSP00000297431	0	0	0	0	0.08	0	0.9	0.146	0.914
CCNE1	CKS2	9606.ENSP00000262643	9606.ENSP00000364976	0	0	0	0	0.202	0.865	0.36	0.315	0.946
CCNE1	E2F1	9606.ENSP00000262643	9606.ENSP00000345571	0	0	0	0	0.246	0.388	0.9	0.592	0.978
CCNE1	TP53	9606.ENSP00000262643	9606.ENSP00000269305	0	0	0	0	0.063	0.123	0.9	0.771	0.978
CCNE1	CDT1	9606.ENSP00000262643	9606.ENSP00000301019	0	0	0	0	0.35	0.305	0.9	0.605	0.979
CCNE1	SKP2	9606.ENSP00000262643	9606.ENSP00000274255	0	0	0	0	0.172	0.472	0.9	0.6	0.98
CCNE1	RB1	9606.ENSP00000262643	9606.ENSP00000267163	0	0	0	0	0.064	0.576	0.9	0.603	0.982
CCNE1	CKS1B	9606.ENSP00000262643	9606.ENSP00000311083	0	0	0	0	0.162	0.87	0.9	0.343	0.991
CCNE1	CDKN1A	9606.ENSP00000262643	9606.ENSP00000384849	0	0	0	0	0.063	0.994	0.9	0.751	0.999
CCNE1	CDK2	9606.ENSP00000262643	9606.ENSP00000266970	0	0	0	0	0.162	0.999	0.9	0.928	0.999
CCNE1	CDK6	9606.ENSP00000262643	9606.ENSP00000265734	0	0	0	0	0.111	0.994	0.8	0.775	0.999
CDC20	CDC6	9606.ENSP00000361540	9606.ENSP00000209728	0	0	0	0	0.76	0.556	0	0.791	0.975
CDC20	MCM5	9606.ENSP00000361540	9606.ENSP00000216122	0	0	0	0	0.96	0.127	0	0.503	0.981
CDC20	RBX1	9606.ENSP00000361540	9606.ENSP00000216225	0	0	0	0	0	0.262	0.9	0.471	0.957
CDC20	NUP107	9606.ENSP00000361540	9606.ENSP00000229179	0	0	0	0	0.17	0	0.9	0.281	0.935
CDC20	FBXO5	9606.ENSP00000361540	9606.ENSP00000229758	0	0	0	0	0.877	0.993	0.9	0.726	0.999
CDC20	SKP1	9606.ENSP00000361540	9606.ENSP00000231487	0	0	0	0	0.062	0	0.9	0.694	0.968
CDC20	MSH2	9606.ENSP00000361540	9606.ENSP00000233146	0	0	0	0	0.231	0.929	0	0.108	0.947
CDC20	NUP85	9606.ENSP00000361540	9606.ENSP00000245544	0	0	0	0	0.182	0	0.9	0.354	0.942
CDC20	DLGAP5	9606.ENSP00000361540	9606.ENSP00000247191	0	0	0	0	0.983	0	0	0.479	0.99
CDC20	GINS2	9606.ENSP00000361540	9606.ENSP00000253462	0	0	0	0	0.869	0	0	0.381	0.915
CDC20	ESPL1	9606.ENSP00000361540	9606.ENSP00000257934	0	0	0	0	0.92	0.323	0.9	0.893	0.999
CDC20	KIF23	9606.ENSP00000361540	9606.ENSP00000260363	0	0	0	0	0.971	0.078	0	0.518	0.986
CDC20	NUP133	9606.ENSP00000361540	9606.ENSP00000261396	0	0	0	0	0.065	0	0.9	0.118	0.91
CDC20	NDC80	9606.ENSP00000361540	9606.ENSP00000261597	0	0	0	0	0.975	0	0.9	0.687	0.999
CDC20	MCM4	9606.ENSP00000361540	9606.ENSP00000262105	0	0	0	0	0.915	0.127	0	0.5	0.959
CDC20	MCM6	9606.ENSP00000361540	9606.ENSP00000264156	0	0	0	0	0.907	0.127	0	0.568	0.961
CDC20	UBE2S	9606.ENSP00000361540	9606.ENSP00000264552	0	0	0	0	0.573	0.993	0.9	0.615	0.999
CDC20	MCM2	9606.ENSP00000361540	9606.ENSP00000265056	0	0	0	0	0.918	0.127	0	0.559	0.965
CDC20	CENPE	9606.ENSP00000361540	9606.ENSP00000265148	0	0	0	0	0.97	0.128	0.9	0.767	0.999
CDC20	CDK2	9606.ENSP00000361540	9606.ENSP00000266970	0	0	0	0	0.453	0.892	0	0.711	0.981
CDC20	NUF2	9606.ENSP00000361540	9606.ENSP00000271452	0	0	0	0	0.922	0	0.9	0.582	0.996
CDC20	SKP2	9606.ENSP00000361540	9606.ENSP00000274255	0	0	0	0	0.281	0.993	0.9	0.706	0.999
CDC20	CENPU	9606.ENSP00000361540	9606.ENSP00000281453	0	0	0	0	0.551	0	0.9	0.312	0.966
CDC20	SPC25	9606.ENSP00000361540	9606.ENSP00000282074	0	0	0	0	0.659	0	0.9	0.214	0.97
CDC20	MAD2L1	9606.ENSP00000361540	9606.ENSP00000296509	0	0	0	0	0.978	0.999	0.9	0.874	0.999
CDC20	PLK1	9606.ENSP00000361540	9606.ENSP00000300093	0	0	0	0	0.981	0.994	0.9	0.912	0.999
CDC20	TPX2	9606.ENSP00000361540	9606.ENSP00000300403	0	0	0	0	0.922	0	0	0.473	0.957
CDC20	CDT1	9606.ENSP00000361540	9606.ENSP00000301019	0	0	0	0	0.923	0.27	0	0.506	0.97
CDC20	MCM7	9606.ENSP00000361540	9606.ENSP00000307288	0	0	0	0	0.917	0.127	0	0.577	0.966
CDC20	CKS1B	9606.ENSP00000361540	9606.ENSP00000311083	0	0	0	0	0.941	0.741	0	0.624	0.993
CDC20	TRIM4	9606.ENSP00000361540	9606.ENSP00000348216	0	0	0	0	0.061	0	0.9	0	0.902
CDC20	SGOL2	9606.ENSP00000361540	9606.ENSP00000350447	0	0	0	0	0.441	0	0.9	0.427	0.965
CDC20	KIF2C	9606.ENSP00000361540	9606.ENSP00000361298	0	0	0	0	0.958	0.078	0.9	0.579	0.998
CDC20	RACGAP1	9606.ENSP00000361540	9606.ENSP00000404190	0	0	0	0	0.882	0	0	0.348	0.92
CDC20	NUP37	9606.ENSP00000361540	9606.ENSP00000448054	0	0	0	0	0.214	0	0.9	0.092	0.922
CDC20	CDC45	9606.ENSP00000361540	9606.ENSP00000405726	0	0	0	0	0.858	0.05	0	0.538	0.932
CDC20	KIF4A	9606.ENSP00000361540	9606.ENSP00000363524	0	0	0	0	0.937	0.078	0	0.417	0.963
CDC20	CENPI	9606.ENSP00000361540	9606.ENSP00000362018	0	0	0	0	0.518	0	0.9	0.355	0.966
CDC20	PBK	9606.ENSP00000361540	9606.ENSP00000428489	0	0	0	0	0.964	0.082	0	0.327	0.976
CDC20	CKS2	9606.ENSP00000361540	9606.ENSP00000364976	0	0	0	0	0.909	0.772	0	0.618	0.991
CDC20	CDCA8	9606.ENSP00000361540	9606.ENSP00000362146	0	0	0	0	0.988	0	0.9	0.599	0.999
CDC45	CDC6	9606.ENSP00000405726	9606.ENSP00000209728	0	0	0	0	0.898	0.124	0.9	0.92	0.999
CDC45	MCM5	9606.ENSP00000405726	9606.ENSP00000216122	0	0	0	0	0.942	0.8	0.9	0.886	0.999
CDC45	ORC6	9606.ENSP00000405726	9606.ENSP00000219097	0	0	0	0	0.376	0.921	0.9	0.759	0.998
CDC45	RPA3	9606.ENSP00000405726	9606.ENSP00000223129	0	0	0	0	0.175	0	0.9	0.252	0.932
CDC45	ORC2	9606.ENSP00000405726	9606.ENSP00000234296	0	0	0	0	0.39	0.964	0.9	0.952	0.999
CDC45	GINS2	9606.ENSP00000405726	9606.ENSP00000253462	0	0	0	0	0.928	0.792	0.9	0.775	0.999
CDC45	RPA1	9606.ENSP00000405726	9606.ENSP00000254719	0	0	0	0	0.477	0.269	0.9	0.613	0.983
CDC45	ORC3	9606.ENSP00000405726	9606.ENSP00000257789	0	0	0	0	0.47	0.816	0.9	0.726	0.996
CDC45	CDK4	9606.ENSP00000405726	9606.ENSP00000257904	0	0	0	0	0.239	0.921	0	0.392	0.96
CDC45	TIPIN	9606.ENSP00000405726	9606.ENSP00000261881	0	0	0	0	0.479	0.16	0.54	0.816	0.958
CDC45	MCM4	9606.ENSP00000405726	9606.ENSP00000262105	0	0	0	0	0.956	0.866	0.9	0.909	0.999
CDC45	GINS1	9606.ENSP00000405726	9606.ENSP00000262460	0	0	0	0	0.651	0.767	0.9	0.852	0.998
CDC45	MCM6	9606.ENSP00000405726	9606.ENSP00000264156	0	0	0	0	0.895	0.977	0.9	0.885	0.999
CDC45	MCM2	9606.ENSP00000405726	9606.ENSP00000265056	0	0	0	0	0.917	0.853	0.9	0.961	0.999
CDC45	POLA2	9606.ENSP00000405726	9606.ENSP00000265465	0	0	0	0	0.906	0.084	0.9	0.662	0.996
CDC45	DBF4	9606.ENSP00000405726	9606.ENSP00000265728	0	0	0	0	0.269	0.126	0.9	0.93	0.994
CDC45	CDK2	9606.ENSP00000405726	9606.ENSP00000266970	0	0	0	0	0.383	0.379	0.9	0.819	0.992
CDC45	GINS4	9606.ENSP00000405726	9606.ENSP00000276533	0	0	0	0	0.327	0.836	0.9	0.935	0.999
CDC45	MAD2L1	9606.ENSP00000405726	9606.ENSP00000296509	0	0	0	0	0.872	0	0	0.464	0.928
CDC45	ORC5	9606.ENSP00000405726	9606.ENSP00000297431	0	0	0	0	0.397	0.843	0.9	0.806	0.997
CDC45	CDT1	9606.ENSP00000405726	9606.ENSP00000301019	0	0	0	0	0.852	0	0	0.918	0.987
CDC45	MCM7	9606.ENSP00000405726	9606.ENSP00000307288	0	0	0	0	0.919	0.977	0.9	0.963	0.999
CDC45	CLSPN	9606.ENSP00000405726	9606.ENSP00000312995	0	0	0	0	0.486	0.379	0.9	0.735	0.99
CDC45	E2F1	9606.ENSP00000405726	9606.ENSP00000345571	0	0	0	0	0.568	0	0.9	0.298	0.967
CDC45	GINS3	9606.ENSP00000405726	9606.ENSP00000401018	0	0	0	0	0.435	0.782	0.9	0.948	0.999
CDC45	TIMELESS	9606.ENSP00000405726	9606.ENSP00000450607	0	0	0	0	0.772	0.361	0	0.78	0.965
CDC6	GINS3	9606.ENSP00000209728	9606.ENSP00000401018	0	0	0	0	0.64	0	0	0.792	0.922
CDC6	PLK1	9606.ENSP00000209728	9606.ENSP00000300093	0	0	0	0	0.567	0.379	0	0.786	0.937
CDC6	CDKN1B	9606.ENSP00000209728	9606.ENSP00000228872	0	0	0	0	0.062	0	0.9	0.418	0.94
CDC6	ESPL1	9606.ENSP00000209728	9606.ENSP00000257934	0	0	0	0	0.844	0.327	0	0.569	0.95
CDC6	FBXO5	9606.ENSP00000209728	9606.ENSP00000229758	0	0	0	0	0.912	0	0	0.482	0.952
CDC6	RPA3	9606.ENSP00000209728	9606.ENSP00000223129	0	0	0	0	0.27	0	0.9	0.554	0.964
CDC6	RPA1	9606.ENSP00000209728	9606.ENSP00000254719	0	0	0	0	0.478	0.129	0.9	0.342	0.966
CDC6	GINS2	9606.ENSP00000209728	9606.ENSP00000253462	0	0	0	0	0.935	0	0	0.547	0.969
CDC6	CLSPN	9606.ENSP00000209728	9606.ENSP00000312995	0	0	0	0	0.522	0	0.9	0.471	0.972
CDC6	DBF4	9606.ENSP00000209728	9606.ENSP00000265728	0	0	0	0	0.3	0.05	0.9	0.873	0.99
CDC6	E2F1	9606.ENSP00000209728	9606.ENSP00000345571	0	0	0	0	0.289	0.715	0.9	0.631	0.991
CDC6	POLA2	9606.ENSP00000209728	9606.ENSP00000265465	0	0	0	0	0.868	0.187	0.9	0.691	0.996
CDC6	MCM5	9606.ENSP00000209728	9606.ENSP00000216122	0.052	0	0	0	0.882	0.843	0.9	0.885	0.999
CDC6	MCM6	9606.ENSP00000209728	9606.ENSP00000264156	0.052	0	0	0	0.717	0.934	0.9	0.871	0.999
CDC6	ORC5	9606.ENSP00000209728	9606.ENSP00000297431	0	0	0	0	0.423	0.97	0.9	0.869	0.999
CDC6	ORC2	9606.ENSP00000209728	9606.ENSP00000234296	0	0	0	0	0.441	0.998	0.9	0.736	0.999
CDC6	MCM7	9606.ENSP00000209728	9606.ENSP00000307288	0.052	0	0	0	0.874	0.998	0.9	0.954	0.999
CDC6	ORC6	9606.ENSP00000209728	9606.ENSP00000219097	0	0	0	0	0.725	0.912	0.9	0.894	0.999
CDC6	CDK2	9606.ENSP00000209728	9606.ENSP00000266970	0	0	0	0	0.446	0.947	0.9	0.901	0.999
CDC6	MCM2	9606.ENSP00000209728	9606.ENSP00000265056	0.052	0	0	0	0.829	0.947	0.9	0.949	0.999
CDC6	ORC3	9606.ENSP00000209728	9606.ENSP00000257789	0	0	0	0	0.335	0.958	0.9	0.868	0.999
CDC6	CDT1	9606.ENSP00000209728	9606.ENSP00000301019	0	0	0	0	0.941	0.837	0.9	0.957	0.999
CDC6	MCM4	9606.ENSP00000209728	9606.ENSP00000262105	0.052	0	0	0	0.915	0.797	0.9	0.885	0.999
CDCA2	NUF2	9606.ENSP00000328228	9606.ENSP00000271452	0	0	0	0	0.658	0	0	0.73	0.904
CDCA2	PBK	9606.ENSP00000328228	9606.ENSP00000428489	0	0	0	0	0.871	0	0	0.314	0.907
CDCA8	NUP107	9606.ENSP00000362146	9606.ENSP00000229179	0	0	0	0	0.148	0	0.9	0.323	0.937
CDCA8	NUP155	9606.ENSP00000362146	9606.ENSP00000231498	0	0	0	0	0.182	0	0.9	0.051	0.915
CDCA8	NUP85	9606.ENSP00000362146	9606.ENSP00000245544	0	0	0	0	0.153	0	0.9	0.07	0.914
CDCA8	DLGAP5	9606.ENSP00000362146	9606.ENSP00000247191	0	0	0	0	0.95	0	0	0.443	0.971
CDCA8	ESPL1	9606.ENSP00000362146	9606.ENSP00000257934	0	0	0	0	0.923	0	0.9	0.428	0.995
CDCA8	KIF23	9606.ENSP00000362146	9606.ENSP00000260363	0	0	0	0	0.875	0	0.9	0.529	0.993
CDCA8	NUP133	9606.ENSP00000362146	9606.ENSP00000261396	0	0	0	0	0.081	0	0.9	0.116	0.911
CDCA8	NDC80	9606.ENSP00000362146	9606.ENSP00000261597	0	0	0	0	0.96	0	0.9	0.567	0.998
CDCA8	CENPE	9606.ENSP00000362146	9606.ENSP00000265148	0	0	0	0	0.96	0	0.9	0.611	0.998
CDCA8	NUF2	9606.ENSP00000362146	9606.ENSP00000271452	0	0	0	0	0.875	0	0.9	0.594	0.994
CDCA8	CENPU	9606.ENSP00000362146	9606.ENSP00000281453	0	0	0	0	0.573	0	0.9	0.223	0.963
CDCA8	SPC25	9606.ENSP00000362146	9606.ENSP00000282074	0	0	0	0	0.642	0	0.9	0.297	0.972
CDCA8	MAD2L1	9606.ENSP00000362146	9606.ENSP00000296509	0	0	0	0	0.968	0	0.9	0.516	0.998
CDCA8	PLK1	9606.ENSP00000362146	9606.ENSP00000300093	0	0	0	0	0.956	0	0.9	0.599	0.998
CDCA8	TPX2	9606.ENSP00000362146	9606.ENSP00000300403	0	0	0	0	0.926	0	0	0.49	0.961
CDCA8	CKS1B	9606.ENSP00000362146	9606.ENSP00000311083	0	0	0	0	0.927	0	0	0.202	0.939
CDCA8	SGOL2	9606.ENSP00000362146	9606.ENSP00000350447	0	0	0	0	0.547	0.313	0.9	0.451	0.98
CDCA8	KIF2C	9606.ENSP00000362146	9606.ENSP00000361298	0	0	0	0	0.931	0.114	0.9	0.658	0.997
CDCA8	CENPI	9606.ENSP00000362146	9606.ENSP00000362018	0	0	0	0	0.491	0	0.9	0.352	0.964
CDCA8	NUP37	9606.ENSP00000362146	9606.ENSP00000448054	0	0	0	0	0.179	0	0.9	0.199	0.928
CDCA8	KIF4A	9606.ENSP00000362146	9606.ENSP00000363524	0	0	0	0	0.889	0	0	0.486	0.94
CDCA8	PBK	9606.ENSP00000362146	9606.ENSP00000428489	0	0	0	0	0.915	0	0	0.33	0.941
CDCA8	RACGAP1	9606.ENSP00000362146	9606.ENSP00000404190	0	0	0	0	0.812	0	0.9	0.524	0.99
CDH2	EVA1A	9606.ENSP00000269141	9606.ENSP00000233712	0	0	0	0	0.076	0	0.9	0	0.903
CDH2	LAMC1	9606.ENSP00000269141	9606.ENSP00000258341	0	0	0	0	0.076	0	0.9	0.187	0.918
CDH2	CREBBP	9606.ENSP00000269141	9606.ENSP00000262367	0	0	0	0	0	0.393	0.9	0.243	0.95
CDH2	TNC	9606.ENSP00000269141	9606.ENSP00000265131	0	0	0	0	0.097	0	0.9	0.211	0.922
CDH2	MFGE8	9606.ENSP00000269141	9606.ENSP00000268150	0	0	0	0	0.065	0	0.9	0.111	0.909
CDH2	SPARCL1	9606.ENSP00000269141	9606.ENSP00000414856	0	0	0	0	0.061	0	0.9	0.113	0.909
CDH2	CDH4	9606.ENSP00000269141	9606.ENSP00000484928	0	0	0	0.972	0.076	0.379	0.9	0.793	0.938
CDH2	SPP1	9606.ENSP00000269141	9606.ENSP00000378517	0	0	0	0	0.065	0	0.9	0.48	0.947
CDH2	FN1	9606.ENSP00000269141	9606.ENSP00000346839	0	0	0	0	0.144	0	0.9	0.804	0.981
CDK2	MCM5	9606.ENSP00000266970	9606.ENSP00000216122	0	0	0	0	0.729	0.157	0.9	0.535	0.988
CDK2	MYBL2	9606.ENSP00000266970	9606.ENSP00000217026	0	0	0	0	0.36	0.454	0.8	0.701	0.976
CDK2	ORC6	9606.ENSP00000266970	9606.ENSP00000219097	0	0	0	0	0.34	0	0.9	0.365	0.954
CDK2	RPA3	9606.ENSP00000266970	9606.ENSP00000223129	0	0	0	0	0.559	0	0.9	0.211	0.962
CDK2	CDKN1B	9606.ENSP00000266970	9606.ENSP00000228872	0	0	0	0	0.051	0.991	0.9	0.934	0.999
CDK2	SKP1	9606.ENSP00000266970	9606.ENSP00000231487	0	0	0	0	0.063	0.439	0.9	0.63	0.977
CDK2	MLH1	9606.ENSP00000266970	9606.ENSP00000231790	0	0.011	0	0	0.089	0.064	0.9	0.312	0.933
CDK2	ORC2	9606.ENSP00000266970	9606.ENSP00000234296	0	0	0	0	0.166	0.844	0.9	0.417	0.991
CDK2	RPA1	9606.ENSP00000266970	9606.ENSP00000254719	0	0	0	0	0.239	0.352	0.9	0.325	0.962
CDK2	ORC3	9606.ENSP00000266970	9606.ENSP00000257789	0	0	0	0	0.171	0.05	0.9	0.303	0.937
CDK2	CDK4	9606.ENSP00000266970	9606.ENSP00000257904	0	0	0.446	0.911	0.119	0.126	0.9	0.952	0.926
CDK2	MDM2	9606.ENSP00000266970	9606.ENSP00000258149	0	0	0	0	0.05	0	0.9	0.697	0.968
CDK2	MCM4	9606.ENSP00000266970	9606.ENSP00000262105	0	0	0	0	0.687	0.478	0.9	0.734	0.995
CDK2	MCM6	9606.ENSP00000266970	9606.ENSP00000264156	0	0	0	0	0.329	0.178	0.9	0.507	0.969
CDK2	MCM2	9606.ENSP00000266970	9606.ENSP00000265056	0	0	0	0	0.762	0.454	0.9	0.643	0.994
CDK2	POLA2	9606.ENSP00000266970	9606.ENSP00000265465	0	0	0	0	0.382	0.053	0.9	0.154	0.943
CDK2	DBF4	9606.ENSP00000266970	9606.ENSP00000265728	0	0	0	0	0.119	0.409	0.9	0.572	0.974
CDK2	CDK6	9606.ENSP00000266970	9606.ENSP00000265734	0	0	0.439	0.927	0.108	0.711	0.9	0.908	0.974
CDK2	HIST1H2BK	9606.ENSP00000266970	9606.ENSP00000349430	0	0	0	0	0.076	0.05	0.9	0.095	0.909
CDK2	ORC5	9606.ENSP00000266970	9606.ENSP00000297431	0	0	0	0	0.184	0	0.9	0.283	0.936
CDK2	CLSPN	9606.ENSP00000266970	9606.ENSP00000312995	0	0	0	0	0.187	0	0.9	0.491	0.955
CDK2	H2AFX	9606.ENSP00000266970	9606.ENSP00000434024	0	0	0	0	0.146	0.126	0.9	0.599	0.966
CDK2	CKS2	9606.ENSP00000266970	9606.ENSP00000364976	0	0	0	0	0.504	0.808	0.54	0.463	0.973
CDK2	MCM7	9606.ENSP00000266970	9606.ENSP00000307288	0	0	0	0	0.406	0.178	0.9	0.623	0.979
CDK2	E2F1	9606.ENSP00000266970	9606.ENSP00000345571	0	0	0	0	0.171	0.461	0.9	0.705	0.985
CDK2	SKP2	9606.ENSP00000266970	9606.ENSP00000274255	0	0	0	0	0.178	0.578	0.9	0.806	0.992
CDK2	CDT1	9606.ENSP00000266970	9606.ENSP00000301019	0	0	0	0	0.271	0.474	0.9	0.853	0.993
CDK2	TP53	9606.ENSP00000266970	9606.ENSP00000269305	0	0	0	0	0.094	0.716	0.9	0.924	0.997
CDK2	CKS1B	9606.ENSP00000266970	9606.ENSP00000311083	0	0	0	0	0.581	0.988	0.9	0.651	0.999
CDK2	RB1	9606.ENSP00000266970	9606.ENSP00000267163	0	0	0	0	0.081	0.994	0.9	0.709	0.999
CDK2	CDKN1A	9606.ENSP00000266970	9606.ENSP00000384849	0	0	0	0	0.051	0.994	0.9	0.942	0.999
CDK4	RPA3	9606.ENSP00000257904	9606.ENSP00000223129	0	0	0	0	0.13	0	0.9	0.139	0.918
CDK4	CDKN1B	9606.ENSP00000257904	9606.ENSP00000228872	0	0	0	0	0.051	0.832	0.9	0.877	0.997
CDK4	SKP1	9606.ENSP00000257904	9606.ENSP00000231487	0	0	0	0	0.061	0.179	0.9	0.406	0.948
CDK4	MLH1	9606.ENSP00000257904	9606.ENSP00000231790	0	0.012	0	0	0.108	0.064	0.9	0.423	0.945
CDK4	RPA1	9606.ENSP00000257904	9606.ENSP00000254719	0	0	0	0	0.174	0.052	0.9	0.211	0.93
CDK4	HIST1H2BK	9606.ENSP00000257904	9606.ENSP00000349430	0	0	0	0	0	0.05	0.9	0.068	0.903
CDK4	H2AFX	9606.ENSP00000257904	9606.ENSP00000434024	0	0	0	0	0.127	0.085	0.9	0.457	0.95
CDK4	SKP2	9606.ENSP00000257904	9606.ENSP00000274255	0	0	0	0	0.082	0.085	0.9	0.698	0.971
CDK4	CKS1B	9606.ENSP00000257904	9606.ENSP00000311083	0	0	0	0	0.296	0.385	0.9	0.431	0.972
CDK4	CDK6	9606.ENSP00000257904	9606.ENSP00000265734	0	0	0.44	0.97	0.061	0.752	0.9	0.961	0.975
CDK4	E2F1	9606.ENSP00000257904	9606.ENSP00000345571	0	0	0	0	0.124	0.168	0.9	0.732	0.977
CDK4	CDKN2C	9606.ENSP00000257904	9606.ENSP00000262662	0	0	0	0	0.061	0.928	0.9	0.732	0.997
CDK4	RB1	9606.ENSP00000257904	9606.ENSP00000267163	0	0	0	0	0.063	0.994	0.9	0.861	0.999
CDK4	CDKN1A	9606.ENSP00000257904	9606.ENSP00000384849	0	0	0	0	0.051	0.994	0.9	0.899	0.999
CDK6	CDKN1B	9606.ENSP00000265734	9606.ENSP00000228872	0	0	0	0	0.051	0.757	0.9	0.838	0.995
CDK6	SKP1	9606.ENSP00000265734	9606.ENSP00000231487	0	0	0	0	0.061	0	0.9	0.359	0.934
CDK6	CDKN2C	9606.ENSP00000265734	9606.ENSP00000262662	0	0	0	0	0	0.984	0.9	0.714	0.999
CDK6	MCM2	9606.ENSP00000265734	9606.ENSP00000265056	0	0	0	0	0.113	0.878	0	0.384	0.928
CDK6	RUNX1	9606.ENSP00000265734	9606.ENSP00000300305	0	0	0	0	0.061	0.537	0.9	0.252	0.963
CDK6	SKP2	9606.ENSP00000265734	9606.ENSP00000274255	0	0	0	0	0.117	0.085	0.9	0.599	0.963
CDK6	CKS1B	9606.ENSP00000265734	9606.ENSP00000311083	0	0	0	0	0.189	0.385	0.9	0.35	0.963
CDK6	E2F1	9606.ENSP00000265734	9606.ENSP00000345571	0	0	0	0	0.063	0.168	0.9	0.699	0.973
CDK6	RB1	9606.ENSP00000265734	9606.ENSP00000267163	0	0	0	0	0.063	0.478	0.9	0.813	0.989
CDK6	CDKN1A	9606.ENSP00000265734	9606.ENSP00000384849	0	0	0	0	0.051	0.879	0.9	0.754	0.996
CDKN1A	CDKN1B	9606.ENSP00000384849	9606.ENSP00000228872	0	0	0	0.739	0	0.689	0.9	0.872	0.974
CDKN1A	SKP1	9606.ENSP00000384849	9606.ENSP00000231487	0	0	0	0	0	0.534	0.9	0.434	0.971
CDKN1A	RPA1	9606.ENSP00000384849	9606.ENSP00000254719	0	0	0	0	0	0	0.9	0.116	0.907
CDKN1A	MDM2	9606.ENSP00000384849	9606.ENSP00000258149	0	0	0	0	0.062	0.692	0	0.806	0.939
CDKN1A	CDKN2C	9606.ENSP00000384849	9606.ENSP00000262662	0	0	0	0	0	0	0.9	0.711	0.969
CDKN1A	EP300	9606.ENSP00000384849	9606.ENSP00000263253	0	0	0	0	0.055	0.379	0.9	0.535	0.969
CDKN1A	RB1	9606.ENSP00000384849	9606.ENSP00000267163	0	0	0	0	0.055	0.41	0.9	0.699	0.981
CDKN1A	TP53	9606.ENSP00000384849	9606.ENSP00000269305	0	0	0	0	0	0.696	0.9	0.97	0.999
CDKN1A	SKP2	9606.ENSP00000384849	9606.ENSP00000274255	0	0	0	0	0	0.624	0.9	0.693	0.987
CDKN1A	CKS1B	9606.ENSP00000384849	9606.ENSP00000311083	0	0	0	0	0.061	0.674	0.9	0.403	0.979
CDKN1A	E2F1	9606.ENSP00000384849	9606.ENSP00000345571	0	0	0	0	0.052	0.435	0.9	0.617	0.976
CDKN1A	TFAP2A	9606.ENSP00000384849	9606.ENSP00000368924	0	0	0	0	0	0	0.9	0.218	0.918
CDKN1A	RUNX3	9606.ENSP00000384849	9606.ENSP00000382800	0	0	0	0	0	0	0.9	0.336	0.93
CDKN1B	MYH9	9606.ENSP00000228872	9606.ENSP00000216181	0	0	0	0	0	0	0.9	0.079	0.903
CDKN1B	RBX1	9606.ENSP00000228872	9606.ENSP00000216225	0	0	0	0	0.058	0.288	0.9	0.306	0.947
CDKN1B	ORC6	9606.ENSP00000228872	9606.ENSP00000219097	0	0	0	0	0.062	0	0.9	0.166	0.914
CDKN1B	ORC5	9606.ENSP00000228872	9606.ENSP00000297431	0	0	0	0	0	0	0.9	0	0.9
CDKN1B	ORC2	9606.ENSP00000228872	9606.ENSP00000234296	0	0	0	0	0.062	0	0.9	0.057	0.903
CDKN1B	ORC3	9606.ENSP00000228872	9606.ENSP00000257789	0	0	0	0	0	0	0.9	0.073	0.903
CDKN1B	ITGAV	9606.ENSP00000228872	9606.ENSP00000261023	0	0	0	0	0	0	0.9	0.115	0.907
CDKN1B	CDT1	9606.ENSP00000228872	9606.ENSP00000301019	0	0	0	0	0.062	0	0.9	0.481	0.947
CDKN1B	E2F1	9606.ENSP00000228872	9606.ENSP00000345571	0	0	0	0	0.052	0.129	0.9	0.578	0.96
CDKN1B	RB1	9606.ENSP00000228872	9606.ENSP00000267163	0	0	0	0	0.061	0.149	0.9	0.609	0.964
CDKN1B	SKP1	9606.ENSP00000228872	9606.ENSP00000231487	0	0	0	0	0.061	0.432	0.9	0.555	0.973
CDKN1B	CDKN2C	9606.ENSP00000228872	9606.ENSP00000262662	0	0	0	0	0	0	0.9	0.757	0.974
CDKN1B	TP53	9606.ENSP00000228872	9606.ENSP00000269305	0	0	0	0	0	0.065	0.9	0.831	0.982
CDKN1B	SKP2	9606.ENSP00000228872	9606.ENSP00000274255	0	0	0	0	0	0.521	0.9	0.771	0.988
CDKN1B	CKS1B	9606.ENSP00000228872	9606.ENSP00000311083	0	0	0	0	0.061	0.674	0.9	0.723	0.99
CDKN2C	TP53	9606.ENSP00000262662	9606.ENSP00000269305	0	0	0	0	0	0.05	0.8	0.571	0.911
CDT1	MCM5	9606.ENSP00000301019	9606.ENSP00000216122	0	0	0	0	0.955	0.185	0.9	0.853	0.999
CDT1	ORC6	9606.ENSP00000301019	9606.ENSP00000219097	0	0	0	0	0.292	0.294	0.9	0.904	0.994
CDT1	ORC2	9606.ENSP00000301019	9606.ENSP00000234296	0	0	0	0	0.169	0.888	0.9	0.733	0.997
CDT1	ORC3	9606.ENSP00000301019	9606.ENSP00000257789	0	0	0	0	0.159	0	0.9	0.813	0.982
CDT1	MCM4	9606.ENSP00000301019	9606.ENSP00000262105	0	0	0	0	0.943	0.379	0.9	0.881	0.999
CDT1	MCM6	9606.ENSP00000301019	9606.ENSP00000264156	0	0	0	0	0.891	0.525	0.9	0.925	0.999
CDT1	MCM2	9606.ENSP00000301019	9606.ENSP00000265056	0	0	0	0	0.935	0.412	0.9	0.916	0.999
CDT1	DBF4	9606.ENSP00000301019	9606.ENSP00000265728	0	0	0	0	0.207	0	0.9	0.873	0.989
CDT1	SKP2	9606.ENSP00000301019	9606.ENSP00000274255	0	0	0	0	0.487	0.752	0	0.756	0.966
CDT1	ORC5	9606.ENSP00000301019	9606.ENSP00000297431	0	0	0	0	0.116	0	0.9	0.853	0.985
CDT1	CKS2	9606.ENSP00000301019	9606.ENSP00000364976	0	0	0	0	0.299	0.864	0	0.145	0.911
CDT1	CKS1B	9606.ENSP00000301019	9606.ENSP00000311083	0	0	0	0	0.39	0.873	0	0.209	0.933
CDT1	E2F1	9606.ENSP00000301019	9606.ENSP00000345571	0	0	0	0	0.405	0	0.9	0.394	0.96
CDT1	MCM7	9606.ENSP00000301019	9606.ENSP00000307288	0	0	0	0	0.941	0.416	0.9	0.944	0.999
CENPE	NUP107	9606.ENSP00000265148	9606.ENSP00000229179	0	0	0	0	0.173	0	0.9	0.323	0.939
CENPE	NUP85	9606.ENSP00000265148	9606.ENSP00000245544	0	0	0	0	0.089	0	0.9	0.104	0.911
CENPE	DLGAP5	9606.ENSP00000265148	9606.ENSP00000247191	0	0	0	0	0.969	0.056	0	0.505	0.984
CENPE	ESPL1	9606.ENSP00000265148	9606.ENSP00000257934	0	0	0	0	0.671	0.125	0.9	0.558	0.985
CENPE	KIF23	9606.ENSP00000265148	9606.ENSP00000260363	0	0	0	0.595	0.884	0	0.9	0.763	0.991
CENPE	NUP133	9606.ENSP00000265148	9606.ENSP00000261396	0	0	0	0	0.087	0.05	0.9	0.193	0.92
CENPE	NDC80	9606.ENSP00000265148	9606.ENSP00000261597	0	0	0	0	0.961	0.526	0.9	0.833	0.999
CENPE	KIF1C	9606.ENSP00000265148	9606.ENSP00000320821	0	0	0	0.606	0	0	0.9	0.3	0.91
CENPE	NUP37	9606.ENSP00000265148	9606.ENSP00000448054	0	0	0	0	0.196	0	0.9	0.083	0.919
CENPE	TPX2	9606.ENSP00000265148	9606.ENSP00000300403	0	0	0	0	0.883	0	0	0.675	0.96
CENPE	SPC25	9606.ENSP00000265148	9606.ENSP00000282074	0	0	0	0	0.567	0	0.9	0.219	0.963
CENPE	KIF4B	9606.ENSP00000265148	9606.ENSP00000387875	0	0	0	0.628	0.652	0	0.9	0.481	0.969
CENPE	SGOL2	9606.ENSP00000265148	9606.ENSP00000350447	0	0	0	0	0.458	0	0.9	0.555	0.973
CENPE	CENPI	9606.ENSP00000265148	9606.ENSP00000362018	0	0	0	0	0.4	0	0.9	0.677	0.978
CENPE	CENPU	9606.ENSP00000265148	9606.ENSP00000281453	0	0	0	0	0.691	0	0.9	0.522	0.983
CENPE	RACGAP1	9606.ENSP00000265148	9606.ENSP00000404190	0	0	0	0	0.703	0.186	0.9	0.612	0.989
CENPE	KIF2C	9606.ENSP00000265148	9606.ENSP00000361298	0	0	0	0.616	0.869	0	0.9	0.771	0.99
CENPE	KIF4A	9606.ENSP00000265148	9606.ENSP00000363524	0	0	0	0.631	0.917	0	0.9	0.745	0.993
CENPE	MAD2L1	9606.ENSP00000265148	9606.ENSP00000296509	0	0	0	0	0.924	0.567	0.9	0.713	0.998
CENPE	PLK1	9606.ENSP00000265148	9606.ENSP00000300093	0	0	0	0	0.923	0.171	0.9	0.734	0.998
CENPE	NUF2	9606.ENSP00000265148	9606.ENSP00000271452	0	0	0	0	0.825	0.45	0.9	0.831	0.998
CENPI	NUP107	9606.ENSP00000362018	9606.ENSP00000229179	0	0	0	0	0.107	0	0.9	0.176	0.92
CENPI	NUP85	9606.ENSP00000362018	9606.ENSP00000245544	0	0	0	0	0.063	0	0.9	0	0.902
CENPI	ESPL1	9606.ENSP00000362018	9606.ENSP00000257934	0	0	0	0	0.221	0	0.9	0.267	0.938
CENPI	NUP133	9606.ENSP00000362018	9606.ENSP00000261396	0	0	0	0	0.064	0	0.9	0.064	0.904
CENPI	NDC80	9606.ENSP00000362018	9606.ENSP00000261597	0	0	0	0	0.585	0.192	0.9	0.773	0.991
CENPI	NUF2	9606.ENSP00000362018	9606.ENSP00000271452	0	0	0	0	0.491	0	0.9	0.809	0.989
CENPI	CENPU	9606.ENSP00000362018	9606.ENSP00000281453	0	0	0	0	0.221	0.826	0.9	0.837	0.997
CENPI	SPC25	9606.ENSP00000362018	9606.ENSP00000282074	0	0	0	0	0.357	0	0.9	0.167	0.941
CENPI	MAD2L1	9606.ENSP00000362018	9606.ENSP00000296509	0	0	0	0	0.501	0	0.9	0.381	0.966
CENPI	PLK1	9606.ENSP00000362018	9606.ENSP00000300093	0	0	0	0	0.413	0	0.9	0.393	0.961
CENPI	HIST1H2BK	9606.ENSP00000362018	9606.ENSP00000349430	0	0	0	0	0	0	0.9	0	0.9
CENPI	SGOL2	9606.ENSP00000362018	9606.ENSP00000350447	0	0	0	0	0.451	0	0.9	0.162	0.95
CENPI	KIF2C	9606.ENSP00000362018	9606.ENSP00000361298	0	0	0	0	0.269	0	0.9	0.416	0.953
CENPI	NUP37	9606.ENSP00000362018	9606.ENSP00000448054	0	0	0	0	0.098	0	0.9	0	0.905
CENPI	H2AFX	9606.ENSP00000362018	9606.ENSP00000434024	0	0	0	0	0.076	0.131	0.9	0	0.912
CENPU	NUP107	9606.ENSP00000281453	9606.ENSP00000229179	0	0	0	0	0.174	0	0.9	0.065	0.916
CENPU	NUP85	9606.ENSP00000281453	9606.ENSP00000245544	0	0	0	0	0.097	0	0.9	0	0.905
CENPU	ESPL1	9606.ENSP00000281453	9606.ENSP00000257934	0	0	0	0	0.228	0	0.9	0.11	0.925
CENPU	NUP133	9606.ENSP00000281453	9606.ENSP00000261396	0	0	0	0	0.062	0	0.9	0	0.902
CENPU	NDC80	9606.ENSP00000281453	9606.ENSP00000261597	0	0	0	0	0.787	0	0.9	0.732	0.993
CENPU	NUF2	9606.ENSP00000281453	9606.ENSP00000271452	0	0	0	0	0.722	0	0.9	0.355	0.98
CENPU	HIST1H2BK	9606.ENSP00000281453	9606.ENSP00000349430	0	0	0	0	0.069	0	0.9	0	0.902
CENPU	H2AFX	9606.ENSP00000281453	9606.ENSP00000434024	0	0	0	0	0.163	0	0.9	0.041	0.912
CENPU	NUP37	9606.ENSP00000281453	9606.ENSP00000448054	0	0	0	0	0.259	0	0.9	0	0.922
CENPU	SPC25	9606.ENSP00000281453	9606.ENSP00000282074	0	0	0	0	0.293	0	0.9	0	0.926
CENPU	SGOL2	9606.ENSP00000281453	9606.ENSP00000350447	0	0	0	0	0.283	0	0.9	0.143	0.933
CENPU	KIF2C	9606.ENSP00000281453	9606.ENSP00000361298	0	0	0	0	0.682	0	0.9	0.348	0.977
CENPU	MAD2L1	9606.ENSP00000281453	9606.ENSP00000296509	0	0	0	0	0.825	0	0.9	0.297	0.986
CENPU	PLK1	9606.ENSP00000281453	9606.ENSP00000300093	0	0	0	0	0.26	0.328	0.9	0.835	0.99
CFLAR	TNFRSF10A	9606.ENSP00000312455	9606.ENSP00000221132	0	0	0	0	0	0.993	0.9	0.823	0.999
CFLAR	TNFSF10	9606.ENSP00000312455	9606.ENSP00000241261	0	0	0	0	0.138	0.328	0.9	0.73	0.982
CFLAR	TNFRSF10B	9606.ENSP00000312455	9606.ENSP00000276431	0	0	0	0	0	0.993	0.9	0.897	0.999
CKS1B	RBX1	9606.ENSP00000311083	9606.ENSP00000216225	0	0	0	0	0.139	0	0.9	0.471	0.95
CKS1B	SKP1	9606.ENSP00000311083	9606.ENSP00000231487	0	0	0	0	0.061	0.974	0.9	0.619	0.998
CKS1B	SKP2	9606.ENSP00000311083	9606.ENSP00000274255	0	0	0	0	0.173	0.93	0.9	0.796	0.998
CKS1B	MAD2L1	9606.ENSP00000311083	9606.ENSP00000296509	0	0	0	0	0.977	0	0	0.269	0.982
CKS1B	PLK1	9606.ENSP00000311083	9606.ENSP00000300093	0	0	0	0	0.865	0	0	0.468	0.925
CKS1B	CKS2	9606.ENSP00000311083	9606.ENSP00000364976	0	0	0	0.974	0.799	0.825	0.8	0.809	0.992
CKS2	SKP1	9606.ENSP00000364976	9606.ENSP00000231487	0	0	0	0	0.061	0.77	0.8	0.461	0.973
CKS2	SKP2	9606.ENSP00000364976	9606.ENSP00000274255	0	0	0	0	0.138	0.331	0.8	0.494	0.933
CKS2	MAD2L1	9606.ENSP00000364976	9606.ENSP00000296509	0	0	0	0	0.957	0	0	0.523	0.978
CLSPN	USP28	9606.ENSP00000312995	9606.ENSP00000003302	0	0	0	0	0.061	0.379	0.9	0.643	0.976
CLSPN	MCM5	9606.ENSP00000312995	9606.ENSP00000216122	0	0	0	0	0.568	0	0.9	0.333	0.968
CLSPN	ORC6	9606.ENSP00000312995	9606.ENSP00000219097	0	0	0	0	0.203	0	0.9	0.194	0.93
CLSPN	RPA3	9606.ENSP00000312995	9606.ENSP00000223129	0	0	0	0	0.095	0.993	0.9	0.273	0.999
CLSPN	ORC2	9606.ENSP00000312995	9606.ENSP00000234296	0	0	0	0	0.206	0	0.9	0.41	0.949
CLSPN	RPA1	9606.ENSP00000312995	9606.ENSP00000254719	0	0	0	0	0.089	0.993	0.9	0.5	0.999
CLSPN	ORC3	9606.ENSP00000312995	9606.ENSP00000257789	0	0	0	0	0.156	0	0.9	0.126	0.919
CLSPN	TIPIN	9606.ENSP00000312995	9606.ENSP00000261881	0	0	0	0	0.227	0	0.9	0.871	0.989
CLSPN	MCM4	9606.ENSP00000312995	9606.ENSP00000262105	0	0	0	0	0.385	0	0.9	0.421	0.961
CLSPN	MCM6	9606.ENSP00000312995	9606.ENSP00000264156	0	0	0	0	0.39	0	0.9	0.361	0.957
CLSPN	MCM2	9606.ENSP00000312995	9606.ENSP00000265056	0	0	0	0	0.57	0	0.9	0.526	0.977
CLSPN	DBF4	9606.ENSP00000312995	9606.ENSP00000265728	0	0	0	0	0.2	0	0.9	0.628	0.967
CLSPN	ORC5	9606.ENSP00000312995	9606.ENSP00000297431	0	0	0	0	0.15	0	0.9	0.285	0.933
CLSPN	WRN	9606.ENSP00000312995	9606.ENSP00000298139	0	0	0	0	0.252	0	0.9	0.411	0.952
CLSPN	PLK1	9606.ENSP00000312995	9606.ENSP00000300093	0	0	0	0	0.411	0.379	0.9	0.877	0.994
CLSPN	MCM7	9606.ENSP00000312995	9606.ENSP00000307288	0	0	0	0	0.381	0	0.9	0.504	0.966
CLSPN	RMI2	9606.ENSP00000312995	9606.ENSP00000310356	0	0	0	0	0.157	0	0.9	0.144	0.921
CLSPN	TIMELESS	9606.ENSP00000312995	9606.ENSP00000450607	0	0	0	0	0.295	0.463	0.9	0.753	0.989
CNN2	VCL	9606.ENSP00000263097	9606.ENSP00000211998	0	0	0	0	0.099	0	0.9	0.537	0.954
CNN2	TIMP2	9606.ENSP00000263097	9606.ENSP00000262768	0	0	0	0	0.06	0	0.9	0.059	0.903
CNN2	CXCL1	9606.ENSP00000263097	9606.ENSP00000379110	0	0	0	0	0.061	0	0.9	0	0.902
COL12A1	COL8A1	9606.ENSP00000325146	9606.ENSP00000261037	0	0	0	0.713	0.156	0	0.9	0.64	0.927
COL12A1	COL5A3	9606.ENSP00000325146	9606.ENSP00000264828	0	0	0	0.548	0.128	0	0.9	0.439	0.926
COL12A1	COL22A1	9606.ENSP00000325146	9606.ENSP00000303153	0	0	0	0.628	0.046	0.063	0.9	0.806	0.931
COL12A1	LEPREL1	9606.ENSP00000325146	9606.ENSP00000316881	0	0	0	0	0.049	0	0.9	0.092	0.906
COL12A1	COL25A1	9606.ENSP00000325146	9606.ENSP00000382083	0	0	0	0.72	0.076	0	0.9	0.379	0.913
COL22A1	COL8A1	9606.ENSP00000303153	9606.ENSP00000261037	0	0	0.289	0.731	0.061	0	0.9	0.252	0.914
COL22A1	COL5A3	9606.ENSP00000303153	9606.ENSP00000264828	0	0	0.314	0.691	0.076	0.063	0.9	0.261	0.92
COL22A1	LEPREL1	9606.ENSP00000303153	9606.ENSP00000316881	0	0	0	0	0	0	0.9	0.092	0.905
COL22A1	COL25A1	9606.ENSP00000303153	9606.ENSP00000382083	0	0	0.206	0.72	0.061	0.063	0.9	0.041	0.908
COL25A1	COL8A1	9606.ENSP00000382083	9606.ENSP00000261037	0	0	0.401	0.684	0	0	0.9	0.242	0.917
COL25A1	COL5A3	9606.ENSP00000382083	9606.ENSP00000264828	0	0	0.347	0.738	0	0	0.9	0.194	0.912
COL25A1	LEPREL1	9606.ENSP00000382083	9606.ENSP00000316881	0	0	0	0	0	0	0.9	0	0.9
COL5A3	COL8A1	9606.ENSP00000264828	9606.ENSP00000261037	0	0	0.431	0.715	0.062	0	0.9	0.541	0.926
COL5A3	LEPREL1	9606.ENSP00000264828	9606.ENSP00000316881	0	0	0	0	0.061	0	0.9	0.042	0.902
COL5A3	LUM	9606.ENSP00000264828	9606.ENSP00000266718	0	0	0	0	0.141	0.082	0.9	0.087	0.918
COL8A1	LEPREL1	9606.ENSP00000261037	9606.ENSP00000316881	0	0	0	0	0	0	0.9	0	0.9
CREBBP	RBX1	9606.ENSP00000262367	9606.ENSP00000216225	0	0.133	0	0	0.049	0	0.9	0.235	0.928
CREBBP	SKP1	9606.ENSP00000262367	9606.ENSP00000231487	0	0	0	0	0.062	0.126	0.9	0.233	0.928
CREBBP	MDM2	9606.ENSP00000262367	9606.ENSP00000258149	0	0	0	0	0	0.379	0.9	0.468	0.964
CREBBP	PEX11A	9606.ENSP00000262367	9606.ENSP00000300056	0	0	0	0	0	0	0.9	0	0.9
CREBBP	FABP7	9606.ENSP00000262367	9606.ENSP00000357429	0	0	0	0	0	0.133	0.9	0.074	0.912
CREBBP	SKP2	9606.ENSP00000262367	9606.ENSP00000274255	0	0	0	0	0	0	0.9	0.175	0.913
CREBBP	EED	9606.ENSP00000262367	9606.ENSP00000263360	0	0	0	0	0.045	0	0.9	0.193	0.916
CREBBP	LPL	9606.ENSP00000262367	9606.ENSP00000309757	0	0	0	0	0	0	0.9	0.207	0.917
CREBBP	ZNF217	9606.ENSP00000262367	9606.ENSP00000360526	0	0	0	0	0.098	0.126	0.9	0.115	0.92
CREBBP	RUNX3	9606.ENSP00000262367	9606.ENSP00000382800	0	0	0	0	0	0.082	0.9	0.229	0.923
CREBBP	RB1	9606.ENSP00000262367	9606.ENSP00000267163	0	0	0	0	0.061	0	0.9	0.268	0.925
CREBBP	HIST1H2BK	9606.ENSP00000262367	9606.ENSP00000349430	0	0	0	0	0	0.261	0.9	0.122	0.929
CREBBP	TFAP2A	9606.ENSP00000262367	9606.ENSP00000368924	0	0	0	0	0.063	0	0.9	0.355	0.934
CREBBP	TFAP2B	9606.ENSP00000262367	9606.ENSP00000377265	0	0	0	0	0.063	0.379	0.9	0.057	0.937
CREBBP	H2AFX	9606.ENSP00000262367	9606.ENSP00000434024	0	0	0	0	0	0.377	0.9	0.209	0.946
CREBBP	FHL2	9606.ENSP00000262367	9606.ENSP00000386665	0	0	0	0	0.062	0.384	0.9	0.237	0.95
CREBBP	RUNX1	9606.ENSP00000262367	9606.ENSP00000300305	0	0	0	0	0.061	0.405	0.9	0.236	0.951
CREBBP	NFATC2	9606.ENSP00000262367	9606.ENSP00000379330	0	0	0	0	0.103	0.379	0.9	0.25	0.952
CREBBP	TCF7L1	9606.ENSP00000262367	9606.ENSP00000282111	0	0	0	0	0.082	0.383	0.9	0.282	0.953
CREBBP	E2F1	9606.ENSP00000262367	9606.ENSP00000345571	0	0	0	0	0.062	0.46	0.9	0.224	0.955
CREBBP	LEF1	9606.ENSP00000262367	9606.ENSP00000265165	0	0	0	0	0.082	0.383	0.9	0.409	0.962
CREBBP	EZH2	9606.ENSP00000262367	9606.ENSP00000320147	0	0	0	0	0.063	0.195	0.9	0.631	0.968
CREBBP	EP300	9606.ENSP00000262367	9606.ENSP00000263253	0	0	0	0.957	0.847	0.379	0.9	0.936	0.99
CREBBP	TP53	9606.ENSP00000262367	9606.ENSP00000269305	0	0	0	0	0	0.965	0.9	0.839	0.999
CSPG4	DSEL	9606.ENSP00000312506	9606.ENSP00000310565	0	0	0	0	0.061	0	0.9	0.116	0.909
CSPG4	HSPG2	9606.ENSP00000312506	9606.ENSP00000363827	0	0	0	0	0.221	0	0.9	0.625	0.968
CXCL1	VCL	9606.ENSP00000379110	9606.ENSP00000211998	0	0	0	0	0	0	0.9	0.113	0.907
CXCL1	TIMP2	9606.ENSP00000379110	9606.ENSP00000262768	0	0	0	0	0.067	0	0.9	0.398	0.938
CXCL1	GAL	9606.ENSP00000379110	9606.ENSP00000265643	0	0	0	0	0	0	0.9	0.156	0.912
CXCL1	CXCL5	9606.ENSP00000379110	9606.ENSP00000296027	0	0	0	0.907	0.397	0.667	0.9	0.887	0.979
CXCL1	S1PR1	9606.ENSP00000379110	9606.ENSP00000305416	0	0	0	0	0	0	0.9	0.146	0.91
CXCL5	GAL	9606.ENSP00000296027	9606.ENSP00000265643	0	0	0	0	0	0	0.9	0.041	0.9
CXCL5	S1PR1	9606.ENSP00000296027	9606.ENSP00000305416	0	0	0	0	0	0	0.9	0.105	0.906
DBF4	MCM5	9606.ENSP00000265728	9606.ENSP00000216122	0	0	0	0	0.191	0.267	0.9	0.824	0.988
DBF4	ORC6	9606.ENSP00000265728	9606.ENSP00000219097	0	0	0	0	0.175	0.895	0.9	0.574	0.995
DBF4	RPA3	9606.ENSP00000265728	9606.ENSP00000223129	0	0	0	0	0.142	0	0.9	0.045	0.91
DBF4	ORC2	9606.ENSP00000265728	9606.ENSP00000234296	0	0	0	0	0.062	0.911	0.9	0.57	0.995
DBF4	RPA1	9606.ENSP00000265728	9606.ENSP00000254719	0	0	0	0	0.084	0.261	0.9	0.144	0.934
DBF4	ORC3	9606.ENSP00000265728	9606.ENSP00000257789	0	0	0	0	0.085	0.522	0.9	0.473	0.973
DBF4	MCM4	9606.ENSP00000265728	9606.ENSP00000262105	0	0	0	0	0.19	0.919	0.9	0.897	0.999
DBF4	MCM6	9606.ENSP00000265728	9606.ENSP00000264156	0	0	0	0	0.302	0.45	0.9	0.824	0.992
DBF4	MCM2	9606.ENSP00000265728	9606.ENSP00000265056	0	0	0	0	0.206	0.91	0.9	0.879	0.999
DBF4	POLA2	9606.ENSP00000265728	9606.ENSP00000265465	0	0	0	0	0.09	0.05	0.9	0.104	0.912
DBF4	ORC5	9606.ENSP00000265728	9606.ENSP00000297431	0	0	0	0	0.146	0.911	0.9	0.647	0.996
DBF4	MCM7	9606.ENSP00000265728	9606.ENSP00000307288	0	0	0	0	0.269	0.91	0.9	0.855	0.998
DLGAP5	ESPL1	9606.ENSP00000247191	9606.ENSP00000257934	0	0	0	0	0.911	0	0	0.245	0.93
DLGAP5	RACGAP1	9606.ENSP00000247191	9606.ENSP00000404190	0	0	0	0	0.887	0.08	0	0.399	0.932
DLGAP5	MAD2L1	9606.ENSP00000247191	9606.ENSP00000296509	0	0	0	0	0.931	0	0	0.4	0.956
DLGAP5	KIF2C	9606.ENSP00000247191	9606.ENSP00000361298	0	0	0	0	0.903	0.082	0	0.545	0.956
DLGAP5	KIF4A	9606.ENSP00000247191	9606.ENSP00000363524	0	0	0	0	0.939	0.056	0	0.427	0.964
DLGAP5	KIF23	9606.ENSP00000247191	9606.ENSP00000260363	0	0	0	0	0.951	0.056	0	0.359	0.967
DLGAP5	PLK1	9606.ENSP00000247191	9606.ENSP00000300093	0	0	0	0	0.946	0.057	0	0.454	0.97
DLGAP5	NUF2	9606.ENSP00000247191	9606.ENSP00000271452	0	0	0	0	0.94	0	0	0.541	0.971
DLGAP5	PBK	9606.ENSP00000247191	9606.ENSP00000428489	0	0	0	0	0.957	0.05	0	0.437	0.975
DLGAP5	NDC80	9606.ENSP00000247191	9606.ENSP00000261597	0	0	0	0	0.971	0	0	0.456	0.983
DLGAP5	TPX2	9606.ENSP00000247191	9606.ENSP00000300403	0	0	0	0	0.965	0	0	0.79	0.992
DOCK1	NTN1	9606.ENSP00000280333	9606.ENSP00000173229	0	0	0	0	0.063	0	0.9	0.396	0.938
DOCK1	KDR	9606.ENSP00000280333	9606.ENSP00000263923	0	0	0	0	0.088	0.157	0.9	0.132	0.924
DOCK1	PXN	9606.ENSP00000280333	9606.ENSP00000267257	0	0	0	0	0.061	0	0.9	0.675	0.966
E2F1	FBXO5	9606.ENSP00000345571	9606.ENSP00000229758	0	0	0	0	0.112	0	0.9	0.238	0.926
E2F1	MDM2	9606.ENSP00000345571	9606.ENSP00000258149	0	0	0	0	0	0.379	0.9	0.558	0.97
E2F1	EP300	9606.ENSP00000345571	9606.ENSP00000263253	0	0	0	0	0.062	0.437	0.9	0.347	0.96
E2F1	EED	9606.ENSP00000345571	9606.ENSP00000263360	0	0	0	0	0.064	0.125	0.9	0.13	0.919
E2F1	RB1	9606.ENSP00000345571	9606.ENSP00000267163	0	0	0	0	0.145	0.974	0.9	0.841	0.999
E2F1	EZH2	9606.ENSP00000345571	9606.ENSP00000320147	0	0	0	0	0.17	0.081	0.9	0.4	0.948
E2F1	E2F7	9606.ENSP00000345571	9606.ENSP00000323246	0	0	0	0.564	0.229	0.32	0.9	0.561	0.956
E2F7	TP53	9606.ENSP00000323246	9606.ENSP00000269305	0	0	0	0	0.096	0	0.9	0.76	0.976
ECE1	EDN1	9606.ENSP00000364028	9606.ENSP00000368683	0	0	0	0	0.065	0.379	0.9	0.904	0.993
EDN1	UTS2	9606.ENSP00000368683	9606.ENSP00000054668	0	0	0	0	0	0	0.9	0.598	0.958
EDN1	MMP2	9606.ENSP00000368683	9606.ENSP00000219070	0	0	0	0	0.061	0	0.8	0.738	0.946
EDN1	SLC9A3R1	9606.ENSP00000368683	9606.ENSP00000262613	0	0	0	0	0	0	0.9	0.104	0.906
EDN1	EP300	9606.ENSP00000368683	9606.ENSP00000263253	0	0	0	0	0	0	0.9	0.312	0.928
EDN1	MAP2K1	9606.ENSP00000368683	9606.ENSP00000302486	0	0	0	0	0	0	0.9	0.452	0.942
EDN1	EDNRB	9606.ENSP00000368683	9606.ENSP00000366416	0	0	0	0	0	0.951	0.9	0.964	0.999
EDN1	LPAR4	9606.ENSP00000368683	9606.ENSP00000408205	0	0	0	0	0	0	0.9	0.124	0.908
EDNRB	UTS2	9606.ENSP00000366416	9606.ENSP00000054668	0	0	0	0	0	0	0.9	0.056	0.901
EDNRB	LPAR4	9606.ENSP00000366416	9606.ENSP00000408205	0	0	0	0.607	0	0	0.9	0.117	0.903
EED	EGR1	9606.ENSP00000263360	9606.ENSP00000239938	0	0	0	0	0	0.192	0.9	0.073	0.918
EED	EP300	9606.ENSP00000263360	9606.ENSP00000263253	0	0	0	0	0	0	0.9	0.217	0.918
EED	HIST1H2BK	9606.ENSP00000263360	9606.ENSP00000349430	0	0	0	0	0	0.19	0.9	0.065	0.917
EED	TP53	9606.ENSP00000263360	9606.ENSP00000269305	0	0	0	0	0.061	0	0.9	0.254	0.923
EED	H2AFX	9606.ENSP00000263360	9606.ENSP00000434024	0	0	0	0	0	0.379	0.9	0.094	0.938
EED	PHF19	9606.ENSP00000263360	9606.ENSP00000483946	0	0	0	0	0.064	0.745	0.9	0.329	0.981
EED	EZH2	9606.ENSP00000263360	9606.ENSP00000320147	0	0	0	0	0.091	0.981	0.9	0.916	0.999
EGR1	IFI35	9606.ENSP00000239938	9606.ENSP00000395590	0	0	0	0	0	0	0.9	0.087	0.904
EGR1	MX1	9606.ENSP00000239938	9606.ENSP00000381601	0	0	0	0	0.063	0.056	0.9	0.19	0.918
EGR1	OASL	9606.ENSP00000239938	9606.ENSP00000257570	0	0	0	0	0.061	0.13	0.9	0.116	0.918
EGR1	EZH2	9606.ENSP00000239938	9606.ENSP00000320147	0	0	0	0	0.051	0.233	0.9	0.377	0.948
EGR1	NFATC2	9606.ENSP00000239938	9606.ENSP00000379330	0	0	0	0	0	0.294	0.9	0.408	0.954
EGR1	TP53	9606.ENSP00000239938	9606.ENSP00000269305	0	0	0	0	0	0.388	0.9	0.804	0.987
EME1	FANCE	9606.ENSP00000376952	9606.ENSP00000229769	0	0	0	0	0.065	0	0.9	0.491	0.948
EME1	FANCM	9606.ENSP00000376952	9606.ENSP00000267430	0	0	0	0	0.09	0.608	0.9	0.856	0.994
EME1	FANCC	9606.ENSP00000376952	9606.ENSP00000289081	0	0	0	0	0.059	0	0.9	0.526	0.951
EME1	WRN	9606.ENSP00000376952	9606.ENSP00000298139	0	0	0	0	0.104	0.261	0.9	0.674	0.975
EME1	MUS81	9606.ENSP00000376952	9606.ENSP00000307853	0	0	0	0	0.081	0.998	0.9	0.982	0.999
EME1	RMI2	9606.ENSP00000376952	9606.ENSP00000310356	0	0	0	0	0.174	0	0.9	0.733	0.976
EME1	ERCC4	9606.ENSP00000376952	9606.ENSP00000310520	0	0	0	0	0.063	0.995	0.9	0.862	0.999
EP300	RBX1	9606.ENSP00000263253	9606.ENSP00000216225	0	0.129	0	0	0	0	0.9	0.242	0.928
EP300	RPA3	9606.ENSP00000263253	9606.ENSP00000223129	0	0	0	0	0	0	0.9	0.057	0.901
EP300	SKP1	9606.ENSP00000263253	9606.ENSP00000231487	0	0	0	0	0.062	0.126	0.9	0.293	0.934
EP300	RPA1	9606.ENSP00000263253	9606.ENSP00000254719	0	0	0	0	0.062	0	0.9	0.112	0.909
EP300	MDM2	9606.ENSP00000263253	9606.ENSP00000258149	0	0	0	0	0	0.379	0.9	0.643	0.975
EP300	THBS1	9606.ENSP00000263253	9606.ENSP00000260356	0	0	0	0	0	0	0.9	0.221	0.918
EP300	ERCC4	9606.ENSP00000263253	9606.ENSP00000310520	0	0	0	0	0.061	0	0.9	0.084	0.906
EP300	FABP7	9606.ENSP00000263253	9606.ENSP00000357429	0	0	0	0	0	0.133	0.9	0.064	0.911
EP300	LPL	9606.ENSP00000263253	9606.ENSP00000309757	0	0	0	0	0	0	0.9	0.189	0.915
EP300	TFAP2B	9606.ENSP00000263253	9606.ENSP00000377265	0	0	0	0	0.063	0	0.9	0.198	0.918
EP300	ZNF217	9606.ENSP00000263253	9606.ENSP00000360526	0	0	0	0	0.063	0.126	0.9	0.194	0.925
EP300	HIST1H2BK	9606.ENSP00000263253	9606.ENSP00000349430	0	0	0	0	0	0.261	0.9	0.156	0.932
EP300	PLK1	9606.ENSP00000263253	9606.ENSP00000300093	0	0	0	0	0.065	0.165	0.9	0.245	0.933
EP300	FHL2	9606.ENSP00000263253	9606.ENSP00000386665	0	0	0	0	0.062	0.384	0.9	0.218	0.948
EP300	RUNX1	9606.ENSP00000263253	9606.ENSP00000300305	0	0	0	0	0.061	0.441	0.9	0.254	0.955
EP300	NFATC2	9606.ENSP00000263253	9606.ENSP00000379330	0	0	0	0	0.062	0.379	0.9	0.329	0.955
EP300	TCF7L1	9606.ENSP00000263253	9606.ENSP00000282111	0	0	0	0	0.082	0.383	0.9	0.322	0.956
EP300	H2AFX	9606.ENSP00000263253	9606.ENSP00000434024	0	0	0	0	0	0.377	0.9	0.37	0.957
EP300	RUNX3	9606.ENSP00000263253	9606.ENSP00000382800	0	0	0	0	0	0.364	0.9	0.4	0.958
EP300	SKP2	9606.ENSP00000263253	9606.ENSP00000274255	0	0	0	0	0	0.379	0.9	0.421	0.96
EP300	TFAP2A	9606.ENSP00000263253	9606.ENSP00000368924	0	0	0	0	0.063	0.379	0.9	0.417	0.961
EP300	RB1	9606.ENSP00000263253	9606.ENSP00000267163	0	0	0	0	0.061	0.379	0.9	0.473	0.965
EP300	EZH2	9606.ENSP00000263253	9606.ENSP00000320147	0	0	0	0	0.063	0.195	0.9	0.707	0.974
EP300	LEF1	9606.ENSP00000263253	9606.ENSP00000265165	0	0	0	0	0.082	0.6	0.9	0.474	0.978
EP300	TP53	9606.ENSP00000263253	9606.ENSP00000269305	0	0	0	0	0	0.957	0.9	0.845	0.999
ERCC4	RBX1	9606.ENSP00000310520	9606.ENSP00000216225	0	0	0	0	0.061	0	0.9	0.246	0.923
ERCC4	RPA3	9606.ENSP00000310520	9606.ENSP00000223129	0	0	0	0	0.053	0	0.9	0.4	0.938
ERCC4	FANCE	9606.ENSP00000310520	9606.ENSP00000229769	0	0	0	0	0.049	0	0.9	0.599	0.958
ERCC4	MSH2	9606.ENSP00000310520	9606.ENSP00000233146	0	0	0	0	0.139	0.547	0.9	0.733	0.988
ERCC4	MSH6	9606.ENSP00000310520	9606.ENSP00000234420	0	0	0	0	0.133	0.302	0.9	0.688	0.978
ERCC4	RPA1	9606.ENSP00000310520	9606.ENSP00000254719	0	0	0	0	0.107	0.261	0.9	0.52	0.964
ERCC4	MSH3	9606.ENSP00000310520	9606.ENSP00000265081	0	0	0	0	0.102	0.143	0.72	0.724	0.932
ERCC4	FANCM	9606.ENSP00000310520	9606.ENSP00000267430	0	0	0	0.543	0.062	0.3	0.9	0.824	0.955
ERCC4	FANCC	9606.ENSP00000310520	9606.ENSP00000289081	0	0	0	0	0.055	0	0.9	0.633	0.962
ERCC4	WRN	9606.ENSP00000310520	9606.ENSP00000298139	0	0	0	0	0.108	0.306	0.9	0.55	0.968
ERCC4	MUS81	9606.ENSP00000310520	9606.ENSP00000307853	0	0	0	0	0.14	0.88	0.9	0.888	0.998
ERCC4	RMI2	9606.ENSP00000310520	9606.ENSP00000310356	0	0	0	0	0	0	0.9	0.151	0.911
ESPL1	NUP107	9606.ENSP00000257934	9606.ENSP00000229179	0	0	0	0	0.153	0	0.9	0.285	0.934
ESPL1	NUP85	9606.ENSP00000257934	9606.ENSP00000245544	0	0	0	0	0.085	0	0.9	0.081	0.908
ESPL1	NUP133	9606.ENSP00000257934	9606.ENSP00000261396	0	0	0	0	0.063	0	0.9	0.058	0.904
ESPL1	NUP37	9606.ENSP00000257934	9606.ENSP00000448054	0	0	0	0	0.098	0	0.9	0	0.905
ESPL1	SPC25	9606.ENSP00000257934	9606.ENSP00000282074	0	0	0	0	0.553	0	0.9	0.148	0.958
ESPL1	SGOL2	9606.ENSP00000257934	9606.ENSP00000350447	0	0	0	0	0.188	0	0.9	0.669	0.97
ESPL1	NUF2	9606.ENSP00000257934	9606.ENSP00000271452	0	0	0	0	0.557	0	0.9	0.43	0.972
ESPL1	MAD2L1	9606.ENSP00000257934	9606.ENSP00000296509	0	0	0	0	0.294	0.131	0.9	0.78	0.984
ESPL1	NDC80	9606.ENSP00000257934	9606.ENSP00000261597	0	0	0	0	0.883	0	0.9	0.672	0.995
ESPL1	KIF2C	9606.ENSP00000257934	9606.ENSP00000361298	0	0	0	0	0.914	0.18	0.9	0.472	0.995
ESPL1	PLK1	9606.ENSP00000257934	9606.ENSP00000300093	0	0	0	0	0.7	0.397	0.9	0.824	0.996
EVA1A	SPP1	9606.ENSP00000233712	9606.ENSP00000378517	0	0	0	0	0	0	0.9	0	0.9
EVA1A	MFGE8	9606.ENSP00000233712	9606.ENSP00000268150	0	0	0	0	0.069	0	0.9	0	0.902
EVA1A	SPARCL1	9606.ENSP00000233712	9606.ENSP00000414856	0	0	0	0	0.061	0	0.9	0	0.902
EVA1A	LAMC1	9606.ENSP00000233712	9606.ENSP00000258341	0	0	0	0	0.14	0	0.9	0	0.91
EVA1A	TNC	9606.ENSP00000233712	9606.ENSP00000265131	0	0	0	0	0.152	0	0.9	0	0.911
EVA1A	FN1	9606.ENSP00000233712	9606.ENSP00000346839	0	0	0	0	0.213	0	0.9	0.047	0.918
EZH2	TP53	9606.ENSP00000320147	9606.ENSP00000269305	0	0	0	0	0.094	0.074	0.9	0.881	0.988
EZH2	HIST1H2BK	9606.ENSP00000320147	9606.ENSP00000349430	0	0	0	0	0.065	0.109	0.9	0.064	0.911
EZH2	H2AFX	9606.ENSP00000320147	9606.ENSP00000434024	0	0	0	0	0.131	0.152	0.9	0.39	0.949
EZH2	PHF19	9606.ENSP00000320147	9606.ENSP00000483946	0	0	0	0	0.107	0.824	0.9	0.575	0.992
F11R	ITGAV	9606.ENSP00000357005	9606.ENSP00000261023	0	0	0	0	0	0	0.9	0.154	0.911
F11R	TGFBR2	9606.ENSP00000357005	9606.ENSP00000351905	0	0	0	0	0.061	0	0.9	0	0.902
FAM83D	TPX2	9606.ENSP00000481110	9606.ENSP00000300403	0	0	0	0	0.773	0	0	0.638	0.914
FANCC	RPA3	9606.ENSP00000289081	9606.ENSP00000223129	0	0	0	0	0.061	0	0.9	0.375	0.936
FANCC	FANCE	9606.ENSP00000289081	9606.ENSP00000229769	0	0	0	0	0	0.993	0.9	0.945	0.999
FANCC	RPA1	9606.ENSP00000289081	9606.ENSP00000254719	0	0	0	0	0.062	0	0.9	0.348	0.933
FANCC	FANCM	9606.ENSP00000289081	9606.ENSP00000267430	0	0	0	0	0.051	0.993	0.9	0.869	0.999
FANCC	TP53	9606.ENSP00000289081	9606.ENSP00000269305	0	0	0	0	0	0	0.9	0.651	0.963
FANCC	MUS81	9606.ENSP00000289081	9606.ENSP00000307853	0	0	0	0	0	0	0.9	0.519	0.949
FANCE	RPA3	9606.ENSP00000229769	9606.ENSP00000223129	0	0	0	0	0	0	0.9	0.427	0.94
FANCE	RPA1	9606.ENSP00000229769	9606.ENSP00000254719	0	0	0	0	0	0	0.9	0.241	0.92
FANCE	MUS81	9606.ENSP00000229769	9606.ENSP00000307853	0	0	0	0	0.061	0	0.9	0.47	0.945
FANCE	FANCM	9606.ENSP00000229769	9606.ENSP00000267430	0	0	0	0	0.061	0.993	0.9	0.879	0.999
FANCM	RPA3	9606.ENSP00000267430	9606.ENSP00000223129	0	0	0	0	0	0	0.9	0.213	0.917
FANCM	MSH6	9606.ENSP00000267430	9606.ENSP00000234420	0	0	0	0	0.131	0.73	0	0.774	0.942
FANCM	RPA1	9606.ENSP00000267430	9606.ENSP00000254719	0	0	0	0	0.091	0.996	0.9	0.583	0.999
FANCM	WRN	9606.ENSP00000267430	9606.ENSP00000298139	0	0	0	0	0.183	0.662	0	0.785	0.935
FANCM	MUS81	9606.ENSP00000267430	9606.ENSP00000307853	0	0	0	0	0.147	0.748	0.9	0.871	0.996
FANCM	RMI2	9606.ENSP00000267430	9606.ENSP00000310356	0	0	0	0	0.071	0.998	0.8	0.784	0.999
FBN2	ITGAV	9606.ENSP00000424571	9606.ENSP00000261023	0	0	0	0	0.085	0.103	0.9	0.089	0.915
FBXO5	NDC80	9606.ENSP00000229758	9606.ENSP00000261597	0	0	0	0	0.914	0	0	0.167	0.925
FBXO5	SKP1	9606.ENSP00000229758	9606.ENSP00000231487	0	0	0	0	0.061	0.369	0.9	0.599	0.973
FBXO5	PLK1	9606.ENSP00000229758	9606.ENSP00000300093	0	0	0	0	0.774	0.379	0.9	0.867	0.997
FHL2	RPA1	9606.ENSP00000386665	9606.ENSP00000254719	0	0	0	0	0	0	0.9	0	0.9
FHL2	TP53	9606.ENSP00000386665	9606.ENSP00000269305	0	0	0	0	0	0	0.9	0.554	0.953
FHL2	NNMT	9606.ENSP00000386665	9606.ENSP00000441434	0	0	0	0	0.951	0	0	0	0.951
FLNA	FLNB	9606.ENSP00000358866	9606.ENSP00000420213	0	0	0	0.974	0.202	0.827	0.8	0.845	0.97
FLT1	KDR	9606.ENSP00000282397	9606.ENSP00000263923	0	0	0	0.909	0.162	0.865	0.9	0.954	0.988
FLT1	PXN	9606.ENSP00000282397	9606.ENSP00000267257	0	0	0	0	0.061	0.054	0.9	0.275	0.927
FLT1	VEGFB	9606.ENSP00000282397	9606.ENSP00000311127	0	0	0	0	0	0.888	0.9	0.92	0.999
FN1	VCL	9606.ENSP00000346839	9606.ENSP00000211998	0	0	0	0	0.086	0.08	0.9	0.832	0.984
FN1	SERPINE1	9606.ENSP00000346839	9606.ENSP00000223095	0	0	0	0	0.295	0	0.9	0.735	0.979
FN1	ZC3HAV1	9606.ENSP00000346839	9606.ENSP00000242351	0	0	0	0	0	0	0.9	0.046	0.9
FN1	LAMC1	9606.ENSP00000346839	9606.ENSP00000258341	0	0	0	0	0.222	0	0.9	0.44	0.952
FN1	THBS1	9606.ENSP00000346839	9606.ENSP00000260356	0	0	0	0	0.169	0.379	0.9	0.692	0.982
FN1	ITGAV	9606.ENSP00000346839	9606.ENSP00000261023	0	0	0	0	0.141	0.87	0.9	0.678	0.995
FN1	TNC	9606.ENSP00000346839	9606.ENSP00000265131	0	0	0	0.582	0.296	0.379	0.9	0.61	0.964
FN1	PXN	9606.ENSP00000346839	9606.ENSP00000267257	0	0	0	0	0.061	0.379	0.9	0.839	0.989
FN1	MFGE8	9606.ENSP00000346839	9606.ENSP00000268150	0	0	0	0	0.117	0	0.9	0.297	0.932
FN1	MAP2K1	9606.ENSP00000346839	9606.ENSP00000302486	0	0	0	0	0	0	0.9	0.529	0.95
FN1	VEGFB	9606.ENSP00000346839	9606.ENSP00000311127	0	0	0	0	0	0	0.9	0.33	0.93
FN1	TLN1	9606.ENSP00000346839	9606.ENSP00000316029	0	0	0	0	0.061	0.08	0.9	0.511	0.952
FN1	PLAUR	9606.ENSP00000346839	9606.ENSP00000339328	0	0	0	0	0.061	0	0.9	0.593	0.958
FN1	TEK	9606.ENSP00000346839	9606.ENSP00000369375	0	0	0	0.54	0.098	0	0.9	0.596	0.931
FN1	SPARCL1	9606.ENSP00000346839	9606.ENSP00000414856	0	0	0	0	0.061	0	0.9	0.348	0.933
FN1	SPP1	9606.ENSP00000346839	9606.ENSP00000378517	0	0	0	0	0.102	0	0.9	0.769	0.977
FZD6	FZD7	9606.ENSP00000351605	9606.ENSP00000286201	0	0	0	0.909	0	0	0.9	0.714	0.906
FZD6	WNT7B	9606.ENSP00000351605	9606.ENSP00000341032	0	0	0	0	0	0.262	0.9	0.586	0.966
FZD7	WNT7B	9606.ENSP00000286201	9606.ENSP00000341032	0	0	0	0	0	0.262	0.9	0.557	0.964
GAD1	SLC32A1	9606.ENSP00000350928	9606.ENSP00000217420	0	0	0	0	0.934	0	0.9	0.878	0.999
GAD1	GAD2	9606.ENSP00000350928	9606.ENSP00000365437	0	0	0.448	0.969	0.238	0.454	0.9	0.932	0.956
GAD2	SLC32A1	9606.ENSP00000365437	9606.ENSP00000217420	0	0	0	0	0.574	0	0.9	0.871	0.994
GAL	S1PR1	9606.ENSP00000265643	9606.ENSP00000305416	0	0	0	0	0	0	0.9	0	0.9
GATA2	RUNX1	9606.ENSP00000345681	9606.ENSP00000300305	0	0	0	0	0	0.26	0.9	0.611	0.968
GINS1	MCM5	9606.ENSP00000262460	9606.ENSP00000216122	0	0	0	0	0.803	0.767	0.9	0.733	0.998
GINS1	GINS2	9606.ENSP00000262460	9606.ENSP00000253462	0	0	0	0	0.932	0.998	0.9	0.963	0.999
GINS1	TIPIN	9606.ENSP00000262460	9606.ENSP00000261881	0	0	0	0	0.564	0.874	0	0.253	0.955
GINS1	MCM4	9606.ENSP00000262460	9606.ENSP00000262105	0	0	0	0	0.706	0.732	0.9	0.645	0.996
GINS1	MCM6	9606.ENSP00000262460	9606.ENSP00000264156	0	0	0	0	0.456	0.731	0.9	0.618	0.993
GINS1	MCM2	9606.ENSP00000262460	9606.ENSP00000265056	0	0	0	0	0.489	0.793	0.9	0.842	0.998
GINS1	MCM7	9606.ENSP00000262460	9606.ENSP00000307288	0	0	0	0	0.801	0.891	0.9	0.717	0.999
GINS1	GINS4	9606.ENSP00000262460	9606.ENSP00000276533	0	0	0	0	0.492	0.996	0.9	0.963	0.999
GINS1	GINS3	9606.ENSP00000262460	9606.ENSP00000401018	0	0	0	0	0.667	0.986	0.9	0.962	0.999
GINS2	MCM5	9606.ENSP00000253462	9606.ENSP00000216122	0	0	0	0	0.932	0.767	0.9	0.647	0.999
GINS2	MAD2L1	9606.ENSP00000253462	9606.ENSP00000296509	0	0	0	0	0.889	0	0	0.169	0.904
GINS2	POLA2	9606.ENSP00000253462	9606.ENSP00000265465	0	0	0	0	0.885	0.084	0	0.719	0.968
GINS2	MCM6	9606.ENSP00000253462	9606.ENSP00000264156	0	0	0	0	0.813	0.756	0.9	0.547	0.997
GINS2	MCM7	9606.ENSP00000253462	9606.ENSP00000307288	0	0	0	0	0.79	0.957	0.9	0.659	0.999
GINS2	MCM2	9606.ENSP00000253462	9606.ENSP00000265056	0	0	0	0	0.928	0.735	0.9	0.664	0.999
GINS2	GINS4	9606.ENSP00000253462	9606.ENSP00000276533	0	0	0	0	0.732	0.996	0.9	0.972	0.999
GINS2	GINS3	9606.ENSP00000253462	9606.ENSP00000401018	0	0	0	0	0.75	0.988	0.9	0.972	0.999
GINS2	MCM4	9606.ENSP00000253462	9606.ENSP00000262105	0	0	0	0	0.88	0.788	0.9	0.714	0.999
GINS3	MCM5	9606.ENSP00000401018	9606.ENSP00000216122	0	0	0	0	0.314	0.758	0.9	0.733	0.994
GINS3	TIPIN	9606.ENSP00000401018	9606.ENSP00000261881	0	0	0	0	0.314	0.869	0	0.474	0.948
GINS3	MCM4	9606.ENSP00000401018	9606.ENSP00000262105	0	0	0	0	0.442	0.735	0.9	0.823	0.997
GINS3	MCM6	9606.ENSP00000401018	9606.ENSP00000264156	0	0	0	0	0.327	0.607	0.9	0.753	0.992
GINS3	MCM2	9606.ENSP00000401018	9606.ENSP00000265056	0	0	0	0	0.453	0.936	0.9	0.822	0.999
GINS3	GINS4	9606.ENSP00000401018	9606.ENSP00000276533	0	0	0	0	0.148	0.994	0.9	0.972	0.999
GINS3	MCM7	9606.ENSP00000401018	9606.ENSP00000307288	0	0	0	0	0.376	0.952	0.9	0.816	0.999
GINS3	TIMELESS	9606.ENSP00000401018	9606.ENSP00000450607	0	0	0	0	0.258	0.862	0	0.44	0.937
GINS4	MCM5	9606.ENSP00000276533	9606.ENSP00000216122	0	0	0	0	0.856	0.852	0.9	0.747	0.999
GINS4	RPA3	9606.ENSP00000276533	9606.ENSP00000223129	0	0	0	0	0.151	0.993	0	0.104	0.994
GINS4	RPA1	9606.ENSP00000276533	9606.ENSP00000254719	0	0	0	0	0.173	0.993	0	0.127	0.995
GINS4	TIPIN	9606.ENSP00000276533	9606.ENSP00000261881	0	0	0	0	0.182	0.875	0.54	0.69	0.983
GINS4	MCM4	9606.ENSP00000276533	9606.ENSP00000262105	0	0	0	0	0.494	0.767	0.9	0.832	0.997
GINS4	MCM6	9606.ENSP00000276533	9606.ENSP00000264156	0	0	0	0	0.561	0.737	0.9	0.824	0.997
GINS4	MCM2	9606.ENSP00000276533	9606.ENSP00000265056	0	0	0	0	0.62	0.767	0.9	0.864	0.998
GINS4	MCM7	9606.ENSP00000276533	9606.ENSP00000307288	0	0	0	0	0.729	0.963	0.9	0.869	0.999
H2AFX	RPA3	9606.ENSP00000434024	9606.ENSP00000223129	0	0	0	0	0.085	0	0.9	0.348	0.935
H2AFX	MLH1	9606.ENSP00000434024	9606.ENSP00000231790	0	0	0	0	0.061	0	0.9	0.486	0.947
H2AFX	RPA1	9606.ENSP00000434024	9606.ENSP00000254719	0	0	0	0	0.097	0.093	0.9	0.506	0.954
H2AFX	THBS1	9606.ENSP00000434024	9606.ENSP00000260356	0	0	0	0	0	0	0.9	0.211	0.917
H2AFX	LEF1	9606.ENSP00000434024	9606.ENSP00000265165	0	0	0	0	0	0	0.9	0.123	0.908
H2AFX	RB1	9606.ENSP00000434024	9606.ENSP00000267163	0	0	0	0	0	0	0.9	0.355	0.932
H2AFX	TP53	9606.ENSP00000434024	9606.ENSP00000269305	0	0	0	0	0	0.379	0	0.896	0.933
H2AFX	TCF7L1	9606.ENSP00000434024	9606.ENSP00000282111	0	0	0	0	0	0	0.9	0.049	0.9
H2AFX	PLK1	9606.ENSP00000434024	9606.ENSP00000300093	0	0	0	0	0.229	0	0.9	0.538	0.961
H2AFX	RUNX1	9606.ENSP00000434024	9606.ENSP00000300305	0	0	0	0	0	0	0.9	0	0.9
H2AFX	HIST1H2BK	9606.ENSP00000434024	9606.ENSP00000349430	0	0	0	0	0.197	0.372	0.9	0.212	0.954
H2AFX	ZNF217	9606.ENSP00000434024	9606.ENSP00000360526	0	0	0	0	0.055	0.06	0.9	0.188	0.918
H2AFX	PHF19	9606.ENSP00000434024	9606.ENSP00000483946	0	0	0	0	0.14	0.063	0.9	0.09	0.916
HAUS8	PLK4	9606.ENSP00000253669	9606.ENSP00000270861	0	0	0	0	0.087	0	0.9	0.183	0.919
HAUS8	PLK1	9606.ENSP00000253669	9606.ENSP00000300093	0	0	0	0	0.113	0	0.9	0.246	0.927
HAUS8	NDC80	9606.ENSP00000253669	9606.ENSP00000261597	0	0	0	0	0.157	0	0	0.948	0.955
HAUS8	NEDD1	9606.ENSP00000253669	9606.ENSP00000451211	0	0	0	0	0	0	0.9	0.613	0.959
HAUS8	TPX2	9606.ENSP00000253669	9606.ENSP00000300403	0	0	0	0	0.128	0	0.9	0.611	0.963
HIST1H2BK	RPA3	9606.ENSP00000349430	9606.ENSP00000223129	0	0	0	0	0	0	0.9	0	0.9
HIST1H2BK	MLH1	9606.ENSP00000349430	9606.ENSP00000231790	0	0	0	0	0.061	0	0.9	0	0.902
HIST1H2BK	RPA1	9606.ENSP00000349430	9606.ENSP00000254719	0	0	0	0	0.061	0.085	0.9	0.049	0.907
HIST1H2BK	THBS1	9606.ENSP00000349430	9606.ENSP00000260356	0	0	0	0	0	0	0.9	0.049	0.9
HIST1H2BK	LEF1	9606.ENSP00000349430	9606.ENSP00000265165	0	0	0	0	0	0	0.9	0	0.9
HIST1H2BK	RB1	9606.ENSP00000349430	9606.ENSP00000267163	0	0	0	0	0	0	0.9	0.064	0.902
HIST1H2BK	TCF7L1	9606.ENSP00000349430	9606.ENSP00000282111	0	0	0	0	0	0	0.9	0	0.9
HIST1H2BK	PLK1	9606.ENSP00000349430	9606.ENSP00000300093	0	0	0	0	0.062	0	0.9	0.181	0.916
HIST1H2BK	RUNX1	9606.ENSP00000349430	9606.ENSP00000300305	0	0	0	0	0	0	0.9	0	0.9
HIST1H2BK	ZNF217	9606.ENSP00000349430	9606.ENSP00000360526	0	0	0	0	0.069	0.077	0.9	0	0.906
HIST1H2BK	PHF19	9606.ENSP00000349430	9606.ENSP00000483946	0	0	0	0	0.063	0.08	0.9	0	0.906
HSPG2	LAMA4	9606.ENSP00000363827	9606.ENSP00000230538	0	0	0	0.543	0.118	0.136	0.9	0.304	0.927
HSPG2	LAMC1	9606.ENSP00000363827	9606.ENSP00000258341	0	0	0	0.572	0.172	0.136	0.9	0.751	0.946
HSPG2	KDR	9606.ENSP00000363827	9606.ENSP00000263923	0	0	0	0.543	0.095	0.467	0.9	0.458	0.957
HSPG2	MFGE8	9606.ENSP00000363827	9606.ENSP00000268150	0	0	0	0	0.127	0	0.9	0.09	0.913
IFI35	OASL	9606.ENSP00000395590	9606.ENSP00000257570	0	0	0	0	0.723	0	0.9	0.567	0.986
IFI35	MX1	9606.ENSP00000395590	9606.ENSP00000381601	0	0	0	0	0.775	0	0.9	0.588	0.989
ITGA11	ITGAV	9606.ENSP00000327290	9606.ENSP00000261023	0	0	0	0.582	0.061	0	0.9	0.519	0.922
ITGA11	ITGB5	9606.ENSP00000327290	9606.ENSP00000296181	0	0	0	0	0.062	0.303	0.9	0.545	0.966
ITGAV	SERPINE1	9606.ENSP00000261023	9606.ENSP00000223095	0	0	0	0	0.076	0	0.9	0.31	0.93
ITGAV	LAMA4	9606.ENSP00000261023	9606.ENSP00000230538	0	0	0	0	0.084	0.157	0.9	0.304	0.939
ITGAV	LAMC1	9606.ENSP00000261023	9606.ENSP00000258341	0	0	0	0	0.158	0.157	0.9	0.328	0.945
ITGAV	SPHK1	9606.ENSP00000261023	9606.ENSP00000313681	0	0	0	0	0	0	0.9	0.062	0.902
ITGAV	TMEM63A	9606.ENSP00000261023	9606.ENSP00000355800	0	0	0	0	0.061	0	0.9	0	0.902
ITGAV	TNC	9606.ENSP00000261023	9606.ENSP00000265131	0	0	0	0	0.107	0.161	0.9	0.059	0.92
ITGAV	TNFRSF1B	9606.ENSP00000261023	9606.ENSP00000365435	0	0	0	0	0.055	0	0.9	0.242	0.922
ITGAV	TGFBR2	9606.ENSP00000261023	9606.ENSP00000351905	0	0	0	0	0.078	0.084	0.9	0.251	0.928
ITGAV	KDR	9606.ENSP00000261023	9606.ENSP00000263923	0	0	0	0	0.062	0	0.9	0.354	0.934
ITGAV	PLAUR	9606.ENSP00000261023	9606.ENSP00000339328	0	0	0	0	0	0	0.9	0.42	0.939
ITGAV	MFGE8	9606.ENSP00000261023	9606.ENSP00000268150	0	0	0	0	0.061	0	0.9	0.511	0.95
ITGAV	TLN1	9606.ENSP00000261023	9606.ENSP00000316029	0	0	0	0	0.077	0.185	0.9	0.493	0.956
ITGAV	PXN	9606.ENSP00000261023	9606.ENSP00000267257	0	0	0	0	0.064	0.412	0.9	0.438	0.964
ITGAV	SPP1	9606.ENSP00000261023	9606.ENSP00000378517	0	0	0	0	0.078	0.379	0.9	0.555	0.971
ITGAV	ITGB5	9606.ENSP00000261023	9606.ENSP00000296181	0	0	0	0	0.117	0.548	0.9	0.75	0.988
ITGB5	VCL	9606.ENSP00000296181	9606.ENSP00000211998	0	0	0	0	0.099	0.124	0.9	0.284	0.935
ITGB5	SERPINE1	9606.ENSP00000296181	9606.ENSP00000223095	0	0	0	0	0.125	0	0.9	0.132	0.917
ITGB5	PXN	9606.ENSP00000296181	9606.ENSP00000267257	0	0	0	0	0.081	0.133	0.9	0.281	0.935
ITGB5	PLAUR	9606.ENSP00000296181	9606.ENSP00000339328	0	0	0	0	0	0	0.9	0.15	0.911
ITGB5	SPP1	9606.ENSP00000296181	9606.ENSP00000378517	0	0	0	0	0.084	0.305	0.9	0.244	0.945
ITGB5	TLN1	9606.ENSP00000296181	9606.ENSP00000316029	0	0	0	0	0.061	0.442	0.9	0.255	0.955
JAG1	RUNX3	9606.ENSP00000254958	9606.ENSP00000382800	0	0	0	0	0	0	0.9	0.48	0.945
KDR	PXN	9606.ENSP00000263923	9606.ENSP00000267257	0	0	0	0	0.049	0.054	0.9	0.477	0.946
KDR	VEGFB	9606.ENSP00000263923	9606.ENSP00000311127	0	0	0	0	0	0.174	0.6	0.871	0.953
KIF1C	KIF23	9606.ENSP00000320821	9606.ENSP00000260363	0	0	0	0.575	0	0.126	0.9	0.314	0.919
KIF1C	KIF2C	9606.ENSP00000320821	9606.ENSP00000361298	0	0	0	0.638	0	0	0.9	0.385	0.913
KIF1C	KIF4B	9606.ENSP00000320821	9606.ENSP00000387875	0	0	0	0.639	0	0.125	0.9	0.379	0.92
KIF1C	RACGAP1	9606.ENSP00000320821	9606.ENSP00000404190	0	0	0	0	0.075	0.186	0.9	0.075	0.921
KIF1C	KIF4A	9606.ENSP00000320821	9606.ENSP00000363524	0	0	0	0.637	0	0.125	0.9	0.48	0.923
KIF23	MCM5	9606.ENSP00000260363	9606.ENSP00000216122	0	0	0	0	0.927	0	0	0.231	0.941
KIF23	MCM4	9606.ENSP00000260363	9606.ENSP00000262105	0	0	0	0	0.893	0	0	0.13	0.903
KIF23	MCM7	9606.ENSP00000260363	9606.ENSP00000307288	0	0	0	0	0.875	0	0	0.268	0.905
KIF23	PBK	9606.ENSP00000260363	9606.ENSP00000428489	0	0	0	0	0.902	0.126	0	0.166	0.922
KIF23	TPX2	9606.ENSP00000260363	9606.ENSP00000300403	0	0	0	0	0.87	0	0	0.514	0.934
KIF23	MAD2L1	9606.ENSP00000260363	9606.ENSP00000296509	0	0	0	0	0.894	0.261	0	0.391	0.948
KIF23	NDC80	9606.ENSP00000260363	9606.ENSP00000261597	0	0	0	0	0.962	0.18	0	0.151	0.971
KIF23	KIF4B	9606.ENSP00000260363	9606.ENSP00000387875	0	0	0	0.58	0.763	0.132	0.9	0.726	0.984
KIF23	KIF2C	9606.ENSP00000260363	9606.ENSP00000361298	0	0	0	0.574	0.795	0	0.9	0.673	0.984
KIF23	KIF4A	9606.ENSP00000260363	9606.ENSP00000363524	0	0	0	0.583	0.932	0.132	0.9	0.871	0.995
KIF23	RACGAP1	9606.ENSP00000260363	9606.ENSP00000404190	0	0	0	0	0.949	0.958	0.9	0.951	0.999
KIF23	PLK1	9606.ENSP00000260363	9606.ENSP00000300093	0	0	0	0	0.928	0.72	0.9	0.824	0.999
KIF2C	NUP107	9606.ENSP00000361298	9606.ENSP00000229179	0	0	0	0	0.153	0	0.9	0.197	0.926
KIF2C	NUP85	9606.ENSP00000361298	9606.ENSP00000245544	0	0	0	0	0.107	0	0.9	0.05	0.907
KIF2C	NUP133	9606.ENSP00000361298	9606.ENSP00000261396	0	0	0	0	0.086	0.05	0.9	0.041	0.905
KIF2C	NDC80	9606.ENSP00000361298	9606.ENSP00000261597	0	0	0	0	0.917	0.18	0.9	0.691	0.997
KIF2C	NUF2	9606.ENSP00000361298	9606.ENSP00000271452	0	0	0	0	0.749	0.151	0.9	0.596	0.99
KIF2C	SPC25	9606.ENSP00000361298	9606.ENSP00000282074	0	0	0	0	0.606	0	0.9	0.281	0.969
KIF2C	MAD2L1	9606.ENSP00000361298	9606.ENSP00000296509	0	0	0	0	0.794	0.261	0.9	0.493	0.991
KIF2C	PLK1	9606.ENSP00000361298	9606.ENSP00000300093	0	0	0	0	0.81	0.472	0.9	0.871	0.998
KIF2C	TPX2	9606.ENSP00000361298	9606.ENSP00000300403	0	0	0	0	0.942	0	0	0.632	0.977
KIF2C	SGOL2	9606.ENSP00000361298	9606.ENSP00000350447	0	0	0	0	0.321	0.328	0.9	0.669	0.982
KIF2C	NUP37	9606.ENSP00000361298	9606.ENSP00000448054	0	0	0	0	0.197	0	0.9	0.118	0.923
KIF2C	PBK	9606.ENSP00000361298	9606.ENSP00000428489	0	0	0	0	0.913	0.126	0	0.27	0.94
KIF2C	KIF4B	9606.ENSP00000361298	9606.ENSP00000387875	0	0	0	0.662	0.451	0	0.9	0.522	0.952
KIF2C	RACGAP1	9606.ENSP00000361298	9606.ENSP00000404190	0	0	0	0	0.794	0.186	0.9	0.471	0.989
KIF2C	KIF4A	9606.ENSP00000361298	9606.ENSP00000363524	0	0	0	0.666	0.889	0	0.9	0.75	0.991
KIF4A	NDC80	9606.ENSP00000363524	9606.ENSP00000261597	0	0	0	0	0.895	0.18	0	0.381	0.942
KIF4A	PLK1	9606.ENSP00000363524	9606.ENSP00000300093	0	0	0	0	0.901	0.171	0	0.615	0.965
KIF4A	TPX2	9606.ENSP00000363524	9606.ENSP00000300403	0	0	0	0	0.96	0	0	0.53	0.98
KIF4A	KIF4B	9606.ENSP00000363524	9606.ENSP00000387875	0	0	0	0.986	0.098	0	0.9	0.879	0.907
KIF4A	PBK	9606.ENSP00000363524	9606.ENSP00000428489	0	0	0	0	0.896	0.126	0	0.318	0.932
KIF4A	RACGAP1	9606.ENSP00000363524	9606.ENSP00000404190	0	0	0	0	0.909	0.186	0.9	0.617	0.996
KIF4B	RACGAP1	9606.ENSP00000387875	9606.ENSP00000404190	0	0	0	0	0.663	0.186	0.9	0.279	0.977
LAMA4	PXN	9606.ENSP00000230538	9606.ENSP00000267257	0	0	0	0	0	0	0.9	0	0.9
LAMA4	LAMC1	9606.ENSP00000230538	9606.ENSP00000258341	0	0	0	0.55	0.116	0	0.9	0.718	0.937
LAMC1	MFGE8	9606.ENSP00000258341	9606.ENSP00000268150	0	0	0	0	0.095	0	0.9	0.049	0.906
LAMC1	SPP1	9606.ENSP00000258341	9606.ENSP00000378517	0	0	0	0	0.061	0	0.9	0.108	0.908
LAMC1	PXN	9606.ENSP00000258341	9606.ENSP00000267257	0	0	0	0	0.065	0	0.9	0.108	0.909
LAMC1	SPARCL1	9606.ENSP00000258341	9606.ENSP00000414856	0	0	0	0	0.061	0	0.9	0.122	0.91
LAMC1	TNC	9606.ENSP00000258341	9606.ENSP00000265131	0	0	0	0	0.169	0.05	0.9	0.284	0.936
LEF1	TCF7L1	9606.ENSP00000265165	9606.ENSP00000282111	0	0	0	0.934	0.061	0	0.9	0.695	0.906
LEF1	RUNX3	9606.ENSP00000265165	9606.ENSP00000382800	0	0	0	0	0.073	0	0.9	0.34	0.933
LPAR4	UTS2	9606.ENSP00000408205	9606.ENSP00000054668	0	0	0	0	0	0	0.9	0	0.9
LPL	PCSK5	9606.ENSP00000309757	9606.ENSP00000446280	0	0	0	0	0	0	0.9	0.175	0.914
MAD2L1	MCM5	9606.ENSP00000296509	9606.ENSP00000216122	0	0	0	0	0.859	0.125	0	0.37	0.915
MAD2L1	NUP107	9606.ENSP00000296509	9606.ENSP00000229179	0	0	0	0	0.335	0	0.9	0.289	0.948
MAD2L1	NUP85	9606.ENSP00000296509	9606.ENSP00000245544	0	0	0	0	0.171	0	0.9	0.094	0.918
MAD2L1	NUP133	9606.ENSP00000296509	9606.ENSP00000261396	0	0	0	0	0.124	0.064	0.9	0.179	0.923
MAD2L1	NDC80	9606.ENSP00000296509	9606.ENSP00000261597	0	0	0	0	0.966	0.571	0.9	0.701	0.999
MAD2L1	MCM4	9606.ENSP00000296509	9606.ENSP00000262105	0	0	0	0	0.868	0.125	0	0.55	0.943
MAD2L1	MCM6	9606.ENSP00000296509	9606.ENSP00000264156	0	0	0	0	0.863	0.125	0	0.493	0.934
MAD2L1	MCM2	9606.ENSP00000296509	9606.ENSP00000265056	0	0	0	0	0.82	0.125	0	0.455	0.907
MAD2L1	PLK4	9606.ENSP00000296509	9606.ENSP00000270861	0	0	0	0	0.828	0.326	0	0.547	0.943
MAD2L1	NUF2	9606.ENSP00000296509	9606.ENSP00000271452	0	0	0	0	0.93	0.084	0.9	0.652	0.997
MAD2L1	SPC25	9606.ENSP00000296509	9606.ENSP00000282074	0	0	0	0	0.793	0	0.9	0.475	0.988
MAD2L1	TPX2	9606.ENSP00000296509	9606.ENSP00000300403	0	0	0	0	0.841	0	0	0.517	0.92
MAD2L1	RACGAP1	9606.ENSP00000296509	9606.ENSP00000404190	0	0	0	0	0.902	0	0	0.291	0.927
MAD2L1	MCM7	9606.ENSP00000296509	9606.ENSP00000307288	0	0	0	0	0.875	0.125	0	0.487	0.939
MAD2L1	SGOL2	9606.ENSP00000296509	9606.ENSP00000350447	0	0	0	0	0.456	0.429	0.9	0.116	0.968
MAD2L1	NUP37	9606.ENSP00000296509	9606.ENSP00000448054	0	0	0	0	0.722	0	0.9	0.106	0.973
MAD2L1	PBK	9606.ENSP00000296509	9606.ENSP00000428489	0	0	0	0	0.98	0.111	0	0.296	0.986
MAD2L1	PLK1	9606.ENSP00000296509	9606.ENSP00000300093	0	0	0	0	0.943	0.362	0.9	0.676	0.998
MAP2K1	NTN1	9606.ENSP00000302486	9606.ENSP00000173229	0	0	0	0	0	0	0.9	0.351	0.932
MAP2K1	VCL	9606.ENSP00000302486	9606.ENSP00000211998	0	0	0	0	0.062	0	0.9	0.36	0.934
MAP2K1	ZC3HAV1	9606.ENSP00000302486	9606.ENSP00000242351	0	0	0	0	0	0	0.9	0	0.9
MAP2K1	TLN1	9606.ENSP00000302486	9606.ENSP00000316029	0	0	0	0	0	0	0.9	0.087	0.904
MCCC1	MCCC2	9606.ENSP00000265594	9606.ENSP00000343657	0.167	0.134	0	0	0.499	0.823	0.9	0.924	0.999
MCM2	MCM5	9606.ENSP00000265056	9606.ENSP00000216122	0	0	0	0.778	0.999	0.998	0.9	0.982	0.999
MCM2	ORC6	9606.ENSP00000265056	9606.ENSP00000219097	0	0	0	0	0.47	0.869	0.9	0.772	0.998
MCM2	RPA3	9606.ENSP00000265056	9606.ENSP00000223129	0	0	0	0	0.842	0.993	0.9	0.224	0.999
MCM2	MSH2	9606.ENSP00000265056	9606.ENSP00000233146	0	0	0	0	0.838	0.052	0	0.592	0.932
MCM2	ORC2	9606.ENSP00000265056	9606.ENSP00000234296	0	0	0	0	0.677	0.976	0.9	0.817	0.999
MCM2	RPA1	9606.ENSP00000265056	9606.ENSP00000254719	0	0	0	0	0.757	0.964	0.9	0.657	0.999
MCM2	ORC3	9606.ENSP00000265056	9606.ENSP00000257789	0	0	0	0	0.505	0.989	0.9	0.715	0.999
MCM2	TIPIN	9606.ENSP00000265056	9606.ENSP00000261881	0	0	0	0	0.605	0.957	0	0.733	0.995
MCM2	MCM4	9606.ENSP00000265056	9606.ENSP00000262105	0	0	0	0.75	0.999	0.998	0.9	0.921	0.999
MCM2	MCM6	9606.ENSP00000265056	9606.ENSP00000264156	0	0	0.256	0.75	0.998	0.998	0.9	0.916	0.999
MCM2	PLK1	9606.ENSP00000265056	9606.ENSP00000300093	0	0	0	0	0.761	0.379	0	0.573	0.931
MCM2	TIMELESS	9606.ENSP00000265056	9606.ENSP00000450607	0	0	0	0	0.874	0.738	0	0.66	0.987
MCM2	ORC5	9606.ENSP00000265056	9606.ENSP00000297431	0	0	0	0	0.458	0.976	0.9	0.788	0.999
MCM2	MCM7	9606.ENSP00000265056	9606.ENSP00000307288	0	0	0	0.786	0.998	0.998	0.9	0.864	0.999
MCM2	POLA2	9606.ENSP00000265056	9606.ENSP00000265465	0	0	0	0	0.916	0.692	0.9	0.672	0.999
MCM4	MCM5	9606.ENSP00000262105	9606.ENSP00000216122	0	0	0	0.783	0.999	0.97	0.9	0.934	0.999
MCM4	ORC6	9606.ENSP00000262105	9606.ENSP00000219097	0	0	0	0	0.685	0.895	0.9	0.61	0.998
MCM4	RPA3	9606.ENSP00000262105	9606.ENSP00000223129	0	0	0	0	0.76	0	0.9	0.205	0.979
MCM4	MSH2	9606.ENSP00000262105	9606.ENSP00000233146	0	0	0	0	0.908	0.052	0	0.28	0.931
MCM4	ORC2	9606.ENSP00000262105	9606.ENSP00000234296	0	0	0	0	0.84	0.97	0.9	0.741	0.999
MCM4	MSH6	9606.ENSP00000262105	9606.ENSP00000234420	0	0	0	0	0.861	0.052	0	0.505	0.929
MCM4	RPA1	9606.ENSP00000262105	9606.ENSP00000254719	0	0	0	0	0.745	0.919	0.9	0.581	0.999
MCM4	ORC3	9606.ENSP00000262105	9606.ENSP00000257789	0	0	0	0	0.685	0.994	0.9	0.772	0.999
MCM4	TIPIN	9606.ENSP00000262105	9606.ENSP00000261881	0	0	0	0	0.719	0.907	0	0.547	0.987
MCM4	TIMELESS	9606.ENSP00000262105	9606.ENSP00000450607	0	0	0	0	0.857	0.293	0	0.55	0.95
MCM4	POLA2	9606.ENSP00000262105	9606.ENSP00000265465	0	0	0	0	0.913	0.261	0.9	0.709	0.997
MCM4	MCM6	9606.ENSP00000262105	9606.ENSP00000264156	0	0	0	0.734	0.999	0.998	0.9	0.936	0.999
MCM4	ORC5	9606.ENSP00000262105	9606.ENSP00000297431	0	0	0	0	0.615	0.97	0.9	0.827	0.999
MCM4	MCM7	9606.ENSP00000262105	9606.ENSP00000307288	0	0	0	0.793	0.998	0.998	0.9	0.937	0.999
MCM5	PLK1	9606.ENSP00000216122	9606.ENSP00000300093	0	0	0	0	0.86	0	0	0.416	0.915
MCM5	MSH2	9606.ENSP00000216122	9606.ENSP00000233146	0	0	0	0	0.905	0.052	0	0.215	0.923
MCM5	TIPIN	9606.ENSP00000216122	9606.ENSP00000261881	0	0	0	0	0.827	0.692	0	0.459	0.968
MCM5	RPA3	9606.ENSP00000216122	9606.ENSP00000223129	0	0	0	0	0.834	0	0.9	0.049	0.982
MCM5	RPA1	9606.ENSP00000216122	9606.ENSP00000254719	0	0	0	0	0.789	0.269	0.9	0.531	0.991
MCM5	POLA2	9606.ENSP00000216122	9606.ENSP00000265465	0	0	0	0	0.924	0.261	0.9	0.522	0.996
MCM5	MCM6	9606.ENSP00000216122	9606.ENSP00000264156	0	0	0.208	0.749	0.999	0.998	0.9	0.918	0.999
MCM5	ORC5	9606.ENSP00000216122	9606.ENSP00000297431	0	0	0	0	0.746	0.964	0.9	0.834	0.999
MCM5	ORC2	9606.ENSP00000216122	9606.ENSP00000234296	0	0	0	0	0.868	0.976	0.9	0.793	0.999
MCM5	MCM7	9606.ENSP00000216122	9606.ENSP00000307288	0	0	0	0.774	0.999	0.977	0.9	0.986	0.999
MCM5	ORC6	9606.ENSP00000216122	9606.ENSP00000219097	0	0	0	0	0.675	0.948	0.9	0.594	0.999
MCM5	ORC3	9606.ENSP00000216122	9606.ENSP00000257789	0	0	0	0	0.722	0.963	0.9	0.813	0.999
MCM6	ORC6	9606.ENSP00000264156	9606.ENSP00000219097	0	0	0	0	0.229	0.878	0.9	0.616	0.995
MCM6	RPA3	9606.ENSP00000264156	9606.ENSP00000223129	0	0	0	0	0.189	0	0.9	0.226	0.931
MCM6	ORC2	9606.ENSP00000264156	9606.ENSP00000234296	0	0	0	0	0.482	0.968	0.9	0.689	0.999
MCM6	RPA1	9606.ENSP00000264156	9606.ENSP00000254719	0	0	0	0	0.834	0.933	0.9	0.529	0.999
MCM6	ORC3	9606.ENSP00000264156	9606.ENSP00000257789	0	0	0	0	0.341	0.386	0.9	0.717	0.987
MCM6	TIPIN	9606.ENSP00000264156	9606.ENSP00000261881	0	0	0	0	0.452	0.799	0	0.576	0.949
MCM6	POLA2	9606.ENSP00000264156	9606.ENSP00000265465	0	0	0	0	0.787	0.261	0.9	0.588	0.992
MCM6	ORC5	9606.ENSP00000264156	9606.ENSP00000297431	0	0	0	0	0.449	0.651	0.9	0.83	0.996
MCM6	MCM7	9606.ENSP00000264156	9606.ENSP00000307288	0	0	0.251	0.784	0.997	0.998	0.9	0.935	0.999
MCM7	ORC6	9606.ENSP00000307288	9606.ENSP00000219097	0	0	0	0	0.55	0.993	0.9	0.704	0.999
MCM7	RPA3	9606.ENSP00000307288	9606.ENSP00000223129	0	0	0	0	0.225	0	0.9	0.266	0.938
MCM7	MSH2	9606.ENSP00000307288	9606.ENSP00000233146	0	0	0	0	0.912	0.052	0	0.351	0.941
MCM7	ORC2	9606.ENSP00000307288	9606.ENSP00000234296	0	0	0	0	0.813	0.976	0.9	0.787	0.999
MCM7	RPA1	9606.ENSP00000307288	9606.ENSP00000254719	0	0	0	0	0.773	0.919	0.9	0.503	0.998
MCM7	ORC3	9606.ENSP00000307288	9606.ENSP00000257789	0	0	0	0	0.506	0.971	0.9	0.78	0.999
MCM7	TIPIN	9606.ENSP00000307288	9606.ENSP00000261881	0	0	0	0	0.691	0.947	0	0.585	0.992
MCM7	POLA2	9606.ENSP00000307288	9606.ENSP00000265465	0	0	0	0	0.911	0.261	0.9	0.513	0.996
MCM7	ORC5	9606.ENSP00000307288	9606.ENSP00000297431	0	0	0	0	0.531	0.97	0.9	0.853	0.999
MCM7	PLK1	9606.ENSP00000307288	9606.ENSP00000300093	0	0	0	0	0.872	0.379	0	0.543	0.96
MCM7	TIMELESS	9606.ENSP00000307288	9606.ENSP00000450607	0	0	0	0	0.804	0.883	0	0.391	0.984
MDM2	NUP107	9606.ENSP00000258149	9606.ENSP00000229179	0	0	0	0	0.055	0	0.9	0.172	0.914
MDM2	NUP155	9606.ENSP00000258149	9606.ENSP00000231498	0	0	0	0	0.062	0	0.9	0	0.902
MDM2	NUP85	9606.ENSP00000258149	9606.ENSP00000245544	0	0	0	0	0	0	0.9	0	0.9
MDM2	RPA1	9606.ENSP00000258149	9606.ENSP00000254719	0	0	0	0	0	0	0.9	0.217	0.918
MDM2	NUP37	9606.ENSP00000258149	9606.ENSP00000448054	0	0	0	0	0	0	0.9	0	0.9
MDM2	NUP133	9606.ENSP00000258149	9606.ENSP00000261396	0	0	0	0	0	0	0.9	0	0.9
MDM2	RUNX3	9606.ENSP00000258149	9606.ENSP00000382800	0	0	0	0	0	0.379	0.9	0.288	0.951
MDM2	RB1	9606.ENSP00000258149	9606.ENSP00000267163	0	0	0	0	0.061	0.379	0.9	0.57	0.971
MDM2	TP53	9606.ENSP00000258149	9606.ENSP00000269305	0	0	0	0	0.236	0.987	0.9	0.974	0.999
MFGE8	TNC	9606.ENSP00000268150	9606.ENSP00000265131	0	0	0	0	0.08	0	0.9	0	0.904
MFGE8	SPARCL1	9606.ENSP00000268150	9606.ENSP00000414856	0	0	0	0	0.055	0	0.9	0.086	0.906
MFGE8	SPP1	9606.ENSP00000268150	9606.ENSP00000378517	0	0	0	0	0.061	0	0.9	0.287	0.927
MLC1	PXN	9606.ENSP00000310375	9606.ENSP00000267257	0	0	0	0	0	0	0.9	0	0.9
MLC1	TLN1	9606.ENSP00000310375	9606.ENSP00000316029	0	0	0	0	0	0	0.9	0.07	0.903
MLH1	RPA3	9606.ENSP00000231790	9606.ENSP00000223129	0	0	0	0	0.082	0	0.9	0.189	0.919
MLH1	RPA1	9606.ENSP00000231790	9606.ENSP00000254719	0	0	0	0	0.188	0	0.9	0.471	0.953
MLH1	TP53	9606.ENSP00000231790	9606.ENSP00000269305	0	0	0	0	0	0	0.9	0.74	0.972
MLH1	MSH2	9606.ENSP00000231790	9606.ENSP00000233146	0.074	0	0.398	0	0.253	0.675	0.9	0.972	0.999
MLH1	MSH6	9606.ENSP00000231790	9606.ENSP00000234420	0.074	0	0.298	0	0.182	0.639	0.9	0.97	0.999
MLH1	MSH3	9606.ENSP00000231790	9606.ENSP00000265081	0.074	0	0.404	0	0.155	0.479	0.9	0.967	0.999
MMP2	TEK	9606.ENSP00000219070	9606.ENSP00000369375	0	0	0	0	0.142	0	0.9	0.472	0.95
MMP2	THBS1	9606.ENSP00000219070	9606.ENSP00000260356	0	0	0	0	0.156	0.294	0.8	0.724	0.962
MMP2	TIMP3	9606.ENSP00000219070	9606.ENSP00000266085	0	0	0	0	0.288	0.457	0.8	0.838	0.985
MMP2	TIMP2	9606.ENSP00000219070	9606.ENSP00000262768	0	0	0	0	0.159	0.944	0.9	0.964	0.999
MSH2	RPA3	9606.ENSP00000233146	9606.ENSP00000223129	0	0	0	0	0.467	0.074	0.9	0.29	0.96
MSH2	TP53	9606.ENSP00000233146	9606.ENSP00000269305	0	0	0	0	0.061	0.379	0.9	0.725	0.981
MSH2	RPA1	9606.ENSP00000233146	9606.ENSP00000254719	0	0	0	0	0.76	0.596	0.9	0.408	0.993
MSH2	MSH6	9606.ENSP00000233146	9606.ENSP00000234420	0	0	0.293	0.642	0.949	0.991	0.9	0.988	0.999
MSH2	MSH3	9606.ENSP00000233146	9606.ENSP00000265081	0	0	0.429	0.649	0.442	0.988	0.9	0.977	0.999
MSH3	RPA3	9606.ENSP00000265081	9606.ENSP00000223129	0	0	0	0	0.088	0.074	0.9	0.312	0.934
MSH3	MSH6	9606.ENSP00000265081	9606.ENSP00000234420	0	0	0.338	0.651	0.293	0.916	0.8	0.98	0.992
MSH3	RPA1	9606.ENSP00000265081	9606.ENSP00000254719	0	0	0	0	0.2	0.479	0.9	0.412	0.972
MSH6	RPA3	9606.ENSP00000234420	9606.ENSP00000223129	0	0	0	0	0.154	0	0.9	0.308	0.936
MSH6	RPA1	9606.ENSP00000234420	9606.ENSP00000254719	0	0	0	0	0.377	0.411	0.9	0.55	0.981
MUS81	WRN	9606.ENSP00000307853	9606.ENSP00000298139	0	0	0	0	0.143	0.699	0.9	0.786	0.993
MUS81	RMI2	9606.ENSP00000307853	9606.ENSP00000310356	0	0	0	0	0	0	0.9	0.688	0.967
MX1	OASL	9606.ENSP00000381601	9606.ENSP00000257570	0	0	0	0	0.965	0.13	0.9	0.758	0.999
MYBL2	TFAP2A	9606.ENSP00000217026	9606.ENSP00000368924	0	0	0	0	0.089	0	0.9	0.09	0.909
MYBL2	PLK1	9606.ENSP00000217026	9606.ENSP00000300093	0	0	0	0	0.596	0	0.9	0.496	0.977
MYO10	NTN1	9606.ENSP00000421280	9606.ENSP00000173229	0	0	0	0	0.061	0	0.9	0.281	0.926
NDC80	NUP107	9606.ENSP00000261597	9606.ENSP00000229179	0	0	0	0	0.253	0	0.9	0.324	0.945
NDC80	NUP85	9606.ENSP00000261597	9606.ENSP00000245544	0	0	0	0	0.175	0.064	0.9	0.073	0.918
NDC80	NUP133	9606.ENSP00000261597	9606.ENSP00000261396	0	0	0	0	0.129	0	0.9	0.171	0.921
NDC80	NUP37	9606.ENSP00000261597	9606.ENSP00000448054	0	0	0	0	0.342	0	0.9	0.058	0.932
NDC80	TPX2	9606.ENSP00000261597	9606.ENSP00000300403	0	0	0	0	0.927	0	0	0.429	0.956
NDC80	PBK	9606.ENSP00000261597	9606.ENSP00000428489	0	0	0	0	0.956	0	0	0.122	0.96
NDC80	SGOL2	9606.ENSP00000261597	9606.ENSP00000350447	0	0	0	0	0.519	0	0.9	0.267	0.961
NDC80	PLK1	9606.ENSP00000261597	9606.ENSP00000300093	0	0	0	0	0.94	0.44	0.9	0.596	0.998
NDC80	SPC25	9606.ENSP00000261597	9606.ENSP00000282074	0	0	0	0	0.78	0.988	0.9	0.979	0.999
NDC80	NUF2	9606.ENSP00000261597	9606.ENSP00000271452	0	0	0	0	0.957	0.997	0.9	0.95	0.999
NDUFA10	NDUFB4	9606.ENSP00000252711	9606.ENSP00000184266	0	0	0	0	0.106	0.908	0.9	0.902	0.999
NDUFA10	NDUFB7	9606.ENSP00000252711	9606.ENSP00000215565	0	0	0	0	0.666	0.974	0.9	0.498	0.999
NDUFA10	NDUFS7	9606.ENSP00000252711	9606.ENSP00000233627	0	0	0	0	0.701	0.853	0.9	0.671	0.998
NDUFA10	NDUFB3	9606.ENSP00000252711	9606.ENSP00000237889	0	0	0	0	0.162	0.876	0.9	0.522	0.994
NDUFA10	NDUFA2	9606.ENSP00000252711	9606.ENSP00000252102	0	0	0	0	0.203	0.998	0.9	0.8	0.999
NDUFA10	NDUFB11	9606.ENSP00000252711	9606.ENSP00000276062	0	0	0	0	0.225	0.786	0.9	0.437	0.989
NDUFA10	NDUFS4	9606.ENSP00000252711	9606.ENSP00000296684	0	0	0	0	0.508	0.873	0.9	0.549	0.996
NDUFA10	NDUFS6	9606.ENSP00000252711	9606.ENSP00000274137	0	0	0	0	0.488	0.856	0.9	0.69	0.997
NDUFA10	NDUFC2	9606.ENSP00000252711	9606.ENSP00000281031	0	0	0	0	0.656	0.87	0.9	0.614	0.998
NDUFA10	NDUFS3	9606.ENSP00000252711	9606.ENSP00000263774	0	0	0	0	0.549	0.95	0.9	0.733	0.999
NDUFA10	NDUFB9	9606.ENSP00000252711	9606.ENSP00000276689	0	0	0	0	0.752	0.942	0.9	0.487	0.999
NDUFA10	NDUFA9	9606.ENSP00000252711	9606.ENSP00000266544	0	0	0	0	0.755	0.974	0.9	0.574	0.999
NDUFA10	NDUFB5	9606.ENSP00000252711	9606.ENSP00000259037	0	0	0	0	0.831	0.942	0.9	0.546	0.999
NDUFA10	NDUFB10	9606.ENSP00000252711	9606.ENSP00000268668	0	0	0	0	0.853	0.877	0.9	0.915	0.999
NDUFA10	NDUFA7	9606.ENSP00000252711	9606.ENSP00000301457	0	0	0	0	0.23	0.942	0.9	0.825	0.999
NDUFA10	NDUFB8	9606.ENSP00000252711	9606.ENSP00000299166	0	0	0	0	0.853	0.908	0.9	0.538	0.999
NDUFA2	NDUFB4	9606.ENSP00000252102	9606.ENSP00000184266	0	0	0	0	0.513	0.942	0.9	0.643	0.998
NDUFA2	NDUFB7	9606.ENSP00000252102	9606.ENSP00000215565	0	0	0	0	0.948	0.998	0.9	0.718	0.999
NDUFA2	NDUFS7	9606.ENSP00000252102	9606.ENSP00000233627	0	0	0	0	0.757	0.998	0.9	0.585	0.999
NDUFA2	NDUFB3	9606.ENSP00000252102	9606.ENSP00000237889	0	0	0	0	0.884	0.998	0.9	0.649	0.999
NDUFA2	NDUFA7	9606.ENSP00000252102	9606.ENSP00000301457	0	0	0	0	0.619	0.998	0.9	0.742	0.999
NDUFA2	NDUFS3	9606.ENSP00000252102	9606.ENSP00000263774	0	0	0	0	0.49	0.998	0.9	0.525	0.999
NDUFA2	NDUFB9	9606.ENSP00000252102	9606.ENSP00000276689	0	0	0	0	0.929	0.998	0.9	0.421	0.999
NDUFA2	NDUFS4	9606.ENSP00000252102	9606.ENSP00000296684	0	0	0	0	0.696	0.998	0.9	0.621	0.999
NDUFA2	NDUFA9	9606.ENSP00000252102	9606.ENSP00000266544	0	0	0	0	0.381	0.998	0.9	0.718	0.999
NDUFA2	NDUFB8	9606.ENSP00000252102	9606.ENSP00000299166	0	0	0	0	0.951	0.998	0.9	0.711	0.999
NDUFA2	NDUFB11	9606.ENSP00000252102	9606.ENSP00000276062	0	0	0	0	0.398	0.997	0.9	0.271	0.999
NDUFA2	NDUFB5	9606.ENSP00000252102	9606.ENSP00000259037	0	0	0	0	0.899	0.998	0.9	0.827	0.999
NDUFA2	NDUFB10	9606.ENSP00000252102	9606.ENSP00000268668	0	0	0	0	0.651	0.998	0.9	0.662	0.999
NDUFA2	NDUFC2	9606.ENSP00000252102	9606.ENSP00000281031	0	0	0	0	0.72	0.998	0.9	0.718	0.999
NDUFA2	NDUFS6	9606.ENSP00000252102	9606.ENSP00000274137	0	0	0	0	0.913	0.998	0.9	0.609	0.999
NDUFA7	NDUFB4	9606.ENSP00000301457	9606.ENSP00000184266	0	0	0	0	0.403	0.95	0.9	0.756	0.999
NDUFA7	NDUFB7	9606.ENSP00000301457	9606.ENSP00000215565	0	0	0	0	0.928	0.931	0.9	0.628	0.999
NDUFA7	NDUFS7	9606.ENSP00000301457	9606.ENSP00000233627	0	0	0	0	0.866	0.935	0.9	0.652	0.999
NDUFA7	NDUFB3	9606.ENSP00000301457	9606.ENSP00000237889	0	0	0	0	0.546	0.943	0.9	0.562	0.998
NDUFA7	NDUFB5	9606.ENSP00000301457	9606.ENSP00000259037	0	0	0	0	0.341	0.949	0.9	0.622	0.998
NDUFA7	NDUFS3	9606.ENSP00000301457	9606.ENSP00000263774	0	0	0	0	0.844	0.994	0.9	0.425	0.999
NDUFA7	NDUFA9	9606.ENSP00000301457	9606.ENSP00000266544	0	0	0	0	0.489	0.979	0.9	0.368	0.999
NDUFA7	NDUFB10	9606.ENSP00000301457	9606.ENSP00000268668	0	0	0	0	0.927	0.937	0.9	0.757	0.999
NDUFA7	NDUFS6	9606.ENSP00000301457	9606.ENSP00000274137	0	0	0	0	0.839	0.987	0.9	0.474	0.999
NDUFA7	NDUFB11	9606.ENSP00000301457	9606.ENSP00000276062	0	0	0	0	0.862	0.902	0.9	0.397	0.999
NDUFA7	NDUFB9	9606.ENSP00000301457	9606.ENSP00000276689	0	0	0	0	0.796	0.944	0.9	0.531	0.999
NDUFA7	NDUFC2	9606.ENSP00000301457	9606.ENSP00000281031	0	0	0	0	0.648	0.909	0.9	0.648	0.998
NDUFA7	NDUFS4	9606.ENSP00000301457	9606.ENSP00000296684	0	0	0	0	0.824	0.993	0.9	0.546	0.999
NDUFA7	NDUFB8	9606.ENSP00000301457	9606.ENSP00000299166	0	0	0	0	0.874	0.908	0.9	0.72	0.999
NDUFA9	NDUFB4	9606.ENSP00000266544	9606.ENSP00000184266	0	0	0	0	0.369	0.974	0.9	0.483	0.999
NDUFA9	NDUFB7	9606.ENSP00000266544	9606.ENSP00000215565	0	0	0	0	0.776	0.954	0.9	0.324	0.999
NDUFA9	NDUFS7	9606.ENSP00000266544	9606.ENSP00000233627	0.111	0	0	0	0.886	0.98	0.9	0.745	0.999
NDUFA9	NDUFB3	9606.ENSP00000266544	9606.ENSP00000237889	0	0	0	0	0.483	0.978	0.9	0.451	0.999
NDUFA9	NDUFB5	9606.ENSP00000266544	9606.ENSP00000259037	0	0	0	0	0.374	0.979	0.9	0.429	0.999
NDUFA9	NDUFS3	9606.ENSP00000266544	9606.ENSP00000263774	0.088	0	0	0	0.944	0.984	0.9	0.842	0.999
NDUFA9	NDUFB11	9606.ENSP00000266544	9606.ENSP00000276062	0	0	0	0	0.428	0.912	0.9	0.294	0.995
NDUFA9	NDUFC2	9606.ENSP00000266544	9606.ENSP00000281031	0	0	0	0	0.459	0.87	0.9	0.674	0.997
NDUFA9	NDUFB9	9606.ENSP00000266544	9606.ENSP00000276689	0	0	0	0	0.903	0.98	0.9	0.538	0.999
NDUFA9	NDUFS4	9606.ENSP00000266544	9606.ENSP00000296684	0	0	0	0	0.87	0.972	0.9	0.66	0.999
NDUFA9	NDUFB10	9606.ENSP00000266544	9606.ENSP00000268668	0	0	0	0	0.852	0.956	0.9	0.482	0.999
NDUFA9	NDUFS6	9606.ENSP00000266544	9606.ENSP00000274137	0	0	0	0	0.474	0.969	0.9	0.497	0.999
NDUFA9	NDUFB8	9606.ENSP00000266544	9606.ENSP00000299166	0	0	0	0	0.774	0.976	0.9	0.763	0.999
NDUFB10	NDUFB4	9606.ENSP00000268668	9606.ENSP00000184266	0	0	0	0	0.319	0.874	0.9	0.8	0.998
NDUFB10	NDUFB7	9606.ENSP00000268668	9606.ENSP00000215565	0	0	0	0	0.944	0.916	0.9	0.62	0.999
NDUFB10	NDUFS7	9606.ENSP00000268668	9606.ENSP00000233627	0	0	0	0	0.864	0.98	0.9	0.387	0.999
NDUFB10	NDUFB3	9606.ENSP00000268668	9606.ENSP00000237889	0	0	0	0	0.517	0.911	0.9	0.522	0.997
NDUFB10	NDUFB5	9606.ENSP00000268668	9606.ENSP00000259037	0	0	0	0	0.928	0.989	0.9	0.611	0.999
NDUFB10	NDUFS3	9606.ENSP00000268668	9606.ENSP00000263774	0	0	0	0	0.944	0.972	0.9	0.496	0.999
NDUFB10	NDUFB9	9606.ENSP00000268668	9606.ENSP00000276689	0	0	0	0	0.948	0.958	0.9	0.63	0.999
NDUFB10	NDUFS4	9606.ENSP00000268668	9606.ENSP00000296684	0	0	0	0	0.881	0.991	0.9	0.307	0.999
NDUFB10	NDUFS6	9606.ENSP00000268668	9606.ENSP00000274137	0	0	0	0	0.933	0.972	0.9	0.547	0.999
NDUFB10	NDUFB8	9606.ENSP00000268668	9606.ENSP00000299166	0	0	0	0	0.932	0.856	0.9	0.425	0.999
NDUFB10	NDUFB11	9606.ENSP00000268668	9606.ENSP00000276062	0	0	0	0	0.93	0.883	0.9	0.497	0.999
NDUFB10	NDUFC2	9606.ENSP00000268668	9606.ENSP00000281031	0	0	0	0	0.842	0.867	0.9	0.587	0.999
NDUFB11	NDUFB4	9606.ENSP00000276062	9606.ENSP00000184266	0	0	0	0	0.172	0.921	0.9	0.367	0.995
NDUFB11	NDUFB7	9606.ENSP00000276062	9606.ENSP00000215565	0	0	0	0	0.943	0.901	0.9	0.427	0.999
NDUFB11	NDUFS7	9606.ENSP00000276062	9606.ENSP00000233627	0	0	0	0	0.803	0.782	0.9	0.374	0.996
NDUFB11	NDUFB3	9606.ENSP00000276062	9606.ENSP00000237889	0	0	0	0	0.321	0.901	0.9	0.322	0.994
NDUFB11	NDUFB5	9606.ENSP00000276062	9606.ENSP00000259037	0	0	0	0	0.841	0.925	0.9	0.228	0.998
NDUFB11	NDUFS3	9606.ENSP00000276062	9606.ENSP00000263774	0	0	0	0	0.896	0.965	0.9	0.405	0.999
NDUFB11	NDUFS6	9606.ENSP00000276062	9606.ENSP00000274137	0	0	0	0	0.501	0.813	0.9	0.394	0.993
NDUFB11	NDUFB9	9606.ENSP00000276062	9606.ENSP00000276689	0	0	0	0	0.868	0.901	0.9	0.22	0.998
NDUFB11	NDUFB8	9606.ENSP00000276062	9606.ENSP00000299166	0	0	0	0	0.86	0.875	0.9	0.354	0.998
NDUFB11	NDUFC2	9606.ENSP00000276062	9606.ENSP00000281031	0	0	0	0	0.715	0.894	0.9	0.474	0.998
NDUFB11	NDUFS4	9606.ENSP00000276062	9606.ENSP00000296684	0	0	0	0	0.888	0.876	0.9	0.411	0.999
NDUFB3	NDUFB4	9606.ENSP00000237889	9606.ENSP00000184266	0	0	0	0	0.841	0.944	0.9	0.437	0.999
NDUFB3	NDUFB7	9606.ENSP00000237889	9606.ENSP00000215565	0	0	0	0	0.812	0.852	0.9	0.689	0.999
NDUFB3	NDUFS7	9606.ENSP00000237889	9606.ENSP00000233627	0	0	0	0	0.656	0.914	0.9	0.548	0.998
NDUFB3	NDUFB9	9606.ENSP00000237889	9606.ENSP00000276689	0	0	0	0	0.792	0.876	0.9	0.537	0.998
NDUFB3	NDUFB8	9606.ENSP00000237889	9606.ENSP00000299166	0	0	0	0	0.673	0.923	0.9	0.634	0.998
NDUFB3	NDUFC2	9606.ENSP00000237889	9606.ENSP00000281031	0	0	0	0	0.717	0.876	0.9	0.559	0.998
NDUFB3	NDUFS3	9606.ENSP00000237889	9606.ENSP00000263774	0	0	0	0	0.531	0.975	0.9	0.523	0.999
NDUFB3	NDUFS4	9606.ENSP00000237889	9606.ENSP00000296684	0	0	0	0	0.916	0.944	0.9	0.462	0.999
NDUFB3	NDUFB5	9606.ENSP00000237889	9606.ENSP00000259037	0	0	0	0	0.774	0.972	0.9	0.733	0.999
NDUFB3	NDUFS6	9606.ENSP00000237889	9606.ENSP00000274137	0	0	0	0	0.676	0.969	0.9	0.582	0.999
NDUFB4	NDUFB7	9606.ENSP00000184266	9606.ENSP00000215565	0	0	0	0	0.357	0.876	0.9	0.542	0.995
NDUFB4	NDUFS7	9606.ENSP00000184266	9606.ENSP00000233627	0	0	0	0	0.311	0.909	0.9	0.435	0.996
NDUFB4	NDUFB8	9606.ENSP00000184266	9606.ENSP00000299166	0	0	0	0	0.576	0.908	0.9	0.528	0.997
NDUFB4	NDUFB5	9606.ENSP00000184266	9606.ENSP00000259037	0	0	0	0	0.372	0.944	0.9	0.416	0.997
NDUFB4	NDUFB9	9606.ENSP00000184266	9606.ENSP00000276689	0	0	0	0	0.486	0.942	0.9	0.657	0.998
NDUFB4	NDUFC2	9606.ENSP00000184266	9606.ENSP00000281031	0	0	0	0	0.496	0.941	0.9	0.498	0.998
NDUFB4	NDUFS3	9606.ENSP00000184266	9606.ENSP00000263774	0	0	0	0	0.285	0.995	0.9	0.556	0.999
NDUFB4	NDUFS4	9606.ENSP00000184266	9606.ENSP00000296684	0	0	0	0	0.615	0.992	0.9	0.463	0.999
NDUFB4	NDUFS6	9606.ENSP00000184266	9606.ENSP00000274137	0	0	0	0	0.442	0.969	0.9	0.48	0.999
NDUFB5	NDUFB7	9606.ENSP00000259037	9606.ENSP00000215565	0	0	0	0	0.873	0.984	0.9	0.777	0.999
NDUFB5	NDUFS7	9606.ENSP00000259037	9606.ENSP00000233627	0	0	0	0	0.691	0.986	0.9	0.685	0.999
NDUFB5	NDUFS3	9606.ENSP00000259037	9606.ENSP00000263774	0	0	0	0	0.864	0.984	0.9	0.551	0.999
NDUFB5	NDUFB9	9606.ENSP00000259037	9606.ENSP00000276689	0	0	0	0	0.914	0.989	0.9	0.757	0.999
NDUFB5	NDUFS4	9606.ENSP00000259037	9606.ENSP00000296684	0	0	0	0	0.95	0.964	0.9	0.505	0.999
NDUFB5	NDUFB8	9606.ENSP00000259037	9606.ENSP00000299166	0	0	0	0	0.898	0.979	0.9	0.445	0.999
NDUFB5	NDUFC2	9606.ENSP00000259037	9606.ENSP00000281031	0	0	0	0	0.839	0.969	0.9	0.632	0.999
NDUFB5	NDUFS6	9606.ENSP00000259037	9606.ENSP00000274137	0	0	0	0	0.891	0.975	0.9	0.591	0.999
NDUFB7	NDUFS3	9606.ENSP00000215565	9606.ENSP00000263774	0	0	0	0	0.918	0.965	0.9	0.772	0.999
NDUFB7	NDUFB9	9606.ENSP00000215565	9606.ENSP00000276689	0	0	0	0	0.973	0.952	0.9	0.469	0.999
NDUFB7	NDUFS4	9606.ENSP00000215565	9606.ENSP00000296684	0	0	0	0	0.967	0.931	0.9	0.65	0.999
NDUFB7	NDUFS6	9606.ENSP00000215565	9606.ENSP00000274137	0	0	0	0	0.945	0.95	0.9	0.701	0.999
NDUFB7	NDUFS7	9606.ENSP00000215565	9606.ENSP00000233627	0	0	0	0	0.949	0.964	0.9	0.552	0.999
NDUFB7	NDUFB8	9606.ENSP00000215565	9606.ENSP00000299166	0	0	0	0	0.956	0.856	0.9	0.474	0.999
NDUFB7	NDUFC2	9606.ENSP00000215565	9606.ENSP00000281031	0	0	0	0	0.908	0.869	0.9	0.295	0.999
NDUFB8	NDUFS7	9606.ENSP00000299166	9606.ENSP00000233627	0	0	0	0	0.923	0.882	0.9	0.701	0.999
NDUFB8	NDUFS3	9606.ENSP00000299166	9606.ENSP00000263774	0	0	0	0	0.885	0.971	0.9	0.715	0.999
NDUFB8	NDUFS6	9606.ENSP00000299166	9606.ENSP00000274137	0	0	0	0	0.898	0.948	0.9	0.615	0.999
NDUFB8	NDUFB9	9606.ENSP00000299166	9606.ENSP00000276689	0	0	0	0	0.955	0.98	0.9	0.528	0.999
NDUFB8	NDUFC2	9606.ENSP00000299166	9606.ENSP00000281031	0	0	0	0	0.834	0.87	0.9	0.481	0.998
NDUFB8	NDUFS4	9606.ENSP00000299166	9606.ENSP00000296684	0	0	0	0	0.938	0.983	0.9	0.484	0.999
NDUFB9	NDUFS7	9606.ENSP00000276689	9606.ENSP00000233627	0	0	0	0	0.947	0.909	0.9	0.52	0.999
NDUFB9	NDUFS3	9606.ENSP00000276689	9606.ENSP00000263774	0	0	0	0	0.916	0.973	0.9	0.44	0.999
NDUFB9	NDUFS6	9606.ENSP00000276689	9606.ENSP00000274137	0	0	0	0	0.947	0.931	0.9	0.527	0.999
NDUFB9	NDUFS4	9606.ENSP00000276689	9606.ENSP00000296684	0	0	0	0	0.965	0.931	0.9	0.449	0.999
NDUFB9	NDUFC2	9606.ENSP00000276689	9606.ENSP00000281031	0	0	0	0	0.867	0.909	0.9	0.426	0.999
NDUFC2	NDUFS7	9606.ENSP00000281031	9606.ENSP00000233627	0	0	0	0	0.633	0.932	0.9	0.523	0.998
NDUFC2	NDUFS3	9606.ENSP00000281031	9606.ENSP00000263774	0	0	0	0	0.672	0.908	0.9	0.46	0.998
NDUFC2	NDUFS6	9606.ENSP00000281031	9606.ENSP00000274137	0	0	0	0	0.846	0.935	0.9	0.571	0.999
NDUFC2	NDUFS4	9606.ENSP00000281031	9606.ENSP00000296684	0	0	0	0	0.816	0.901	0.9	0.55	0.999
NDUFS3	NDUFS7	9606.ENSP00000263774	9606.ENSP00000233627	0.295	0	0.435	0	0.906	0.989	0.9	0.915	0.999
NDUFS3	NDUFS4	9606.ENSP00000263774	9606.ENSP00000296684	0	0	0	0	0.891	0.993	0.9	0.749	0.999
NDUFS3	NDUFS6	9606.ENSP00000263774	9606.ENSP00000274137	0	0	0	0	0.72	0.993	0.9	0.773	0.999
NDUFS4	NDUFS7	9606.ENSP00000296684	9606.ENSP00000233627	0	0	0	0	0.782	0.955	0.9	0.898	0.999
NDUFS4	NDUFS6	9606.ENSP00000296684	9606.ENSP00000274137	0	0	0	0	0.918	0.937	0.9	0.81	0.999
NDUFS6	NDUFS7	9606.ENSP00000274137	9606.ENSP00000233627	0	0	0	0	0.78	0.989	0.9	0.763	0.999
NEDD1	PLK4	9606.ENSP00000451211	9606.ENSP00000270861	0	0	0	0	0.123	0.117	0.9	0.562	0.961
NEDD1	PLK1	9606.ENSP00000451211	9606.ENSP00000300093	0	0	0	0	0.085	0	0.9	0.759	0.976
NEDD1	TPX2	9606.ENSP00000451211	9606.ENSP00000300403	0	0	0	0	0.112	0	0.9	0.627	0.964
NEK9	NUP107	9606.ENSP00000238616	9606.ENSP00000229179	0	0	0	0	0.077	0	0.9	0.167	0.916
NEK9	NUP155	9606.ENSP00000238616	9606.ENSP00000231498	0	0	0	0	0.063	0.05	0.9	0.069	0.906
NEK9	NUP37	9606.ENSP00000238616	9606.ENSP00000448054	0	0	0	0	0	0	0.9	0.048	0.9
NEK9	NUP133	9606.ENSP00000238616	9606.ENSP00000261396	0	0	0	0	0	0.057	0.9	0.067	0.904
NEK9	NUP85	9606.ENSP00000238616	9606.ENSP00000245544	0	0	0	0	0.063	0	0.9	0.131	0.911
NEK9	PLK1	9606.ENSP00000238616	9606.ENSP00000300093	0	0	0	0.614	0.064	0.472	0.9	0.709	0.96
NFATC2	RUNX1	9606.ENSP00000379330	9606.ENSP00000300305	0	0	0	0	0.065	0.135	0.9	0.181	0.924
NUF2	NUP107	9606.ENSP00000271452	9606.ENSP00000229179	0	0	0	0	0.16	0	0.9	0.291	0.935
NUF2	NUP85	9606.ENSP00000271452	9606.ENSP00000245544	0	0	0	0	0.095	0	0.9	0.305	0.931
NUF2	NUP133	9606.ENSP00000271452	9606.ENSP00000261396	0	0	0	0	0.086	0	0.9	0.228	0.923
NUF2	NUP37	9606.ENSP00000271452	9606.ENSP00000448054	0	0	0	0	0.287	0.064	0.9	0	0.927
NUF2	TPX2	9606.ENSP00000271452	9606.ENSP00000300403	0	0	0	0	0.899	0	0	0.511	0.949
NUF2	PBK	9606.ENSP00000271452	9606.ENSP00000428489	0	0	0	0	0.919	0	0	0.401	0.949
NUF2	SGOL2	9606.ENSP00000271452	9606.ENSP00000350447	0	0	0	0	0.596	0	0.9	0.213	0.965
NUF2	PLK1	9606.ENSP00000271452	9606.ENSP00000300093	0	0	0	0	0.874	0	0.9	0.447	0.992
NUF2	SPC25	9606.ENSP00000271452	9606.ENSP00000282074	0	0	0	0	0.833	0.987	0.9	0.961	0.999
NUP107	SGOL2	9606.ENSP00000229179	9606.ENSP00000350447	0	0	0	0	0.112	0	0.9	0	0.907
NUP107	SPC25	9606.ENSP00000229179	9606.ENSP00000282074	0	0	0	0	0.116	0	0.9	0.05	0.908
NUP107	PLK1	9606.ENSP00000229179	9606.ENSP00000300093	0	0	0	0	0.192	0	0.9	0.18	0.928
NUP107	NUP37	9606.ENSP00000229179	9606.ENSP00000448054	0	0	0	0	0.421	0.901	0.9	0.937	0.999
NUP107	NUP85	9606.ENSP00000229179	9606.ENSP00000245544	0	0	0	0	0.562	0.994	0.9	0.935	0.999
NUP107	NUP155	9606.ENSP00000229179	9606.ENSP00000231498	0	0	0	0	0.631	0.911	0.9	0.896	0.999
NUP107	NUP133	9606.ENSP00000229179	9606.ENSP00000261396	0	0	0	0	0.864	0.966	0.9	0.944	0.999
NUP133	NUP155	9606.ENSP00000261396	9606.ENSP00000231498	0	0	0	0	0.794	0.818	0.9	0.874	0.999
NUP133	NUP85	9606.ENSP00000261396	9606.ENSP00000245544	0	0	0	0	0.295	0.901	0.9	0.944	0.999
NUP133	SPC25	9606.ENSP00000261396	9606.ENSP00000282074	0	0	0	0	0.078	0	0.9	0	0.903
NUP133	PLK1	9606.ENSP00000261396	9606.ENSP00000300093	0	0	0	0	0.066	0	0.9	0.108	0.909
NUP133	SGOL2	9606.ENSP00000261396	9606.ENSP00000350447	0	0	0	0	0.081	0	0.9	0.2	0.92
NUP133	NUP37	9606.ENSP00000261396	9606.ENSP00000448054	0	0	0	0	0.194	0.849	0.9	0.894	0.998
NUP155	NUP37	9606.ENSP00000231498	9606.ENSP00000448054	0	0	0	0	0.209	0.8	0.9	0.643	0.993
NUP155	NUP85	9606.ENSP00000231498	9606.ENSP00000245544	0	0	0	0	0.185	0.817	0.9	0.869	0.997
NUP37	NUP85	9606.ENSP00000448054	9606.ENSP00000245544	0	0	0	0	0.176	0.849	0.9	0.894	0.998
NUP37	SPC25	9606.ENSP00000448054	9606.ENSP00000282074	0	0	0	0	0.151	0	0.9	0	0.911
NUP37	PLK1	9606.ENSP00000448054	9606.ENSP00000300093	0	0	0	0	0.132	0	0.9	0.089	0.914
NUP37	SGOL2	9606.ENSP00000448054	9606.ENSP00000350447	0	0	0	0	0.203	0	0.9	0	0.916
NUP85	SPC25	9606.ENSP00000245544	9606.ENSP00000282074	0	0	0	0	0.063	0	0.9	0	0.902
NUP85	SGOL2	9606.ENSP00000245544	9606.ENSP00000350447	0	0	0	0	0.062	0	0.9	0	0.902
NUP85	PLK1	9606.ENSP00000245544	9606.ENSP00000300093	0	0	0	0	0.139	0	0.9	0.16	0.921
OASL	TRIM6	9606.ENSP00000257570	9606.ENSP00000369440	0	0	0	0	0	0.133	0.9	0.067	0.912
OASL	TRIM22	9606.ENSP00000257570	9606.ENSP00000369299	0	0	0	0	0.162	0.133	0.9	0.398	0.95
ORC2	ORC6	9606.ENSP00000234296	9606.ENSP00000219097	0	0	0	0	0.46	0.972	0.9	0.912	0.999
ORC2	RPA3	9606.ENSP00000234296	9606.ENSP00000223129	0	0	0	0	0.067	0	0.9	0.062	0.904
ORC2	POLA2	9606.ENSP00000234296	9606.ENSP00000265465	0	0	0	0	0.708	0.262	0.9	0.37	0.984
ORC2	RPA1	9606.ENSP00000234296	9606.ENSP00000254719	0	0	0	0	0.266	0.899	0.9	0.445	0.995
ORC2	ORC5	9606.ENSP00000234296	9606.ENSP00000297431	0	0	0	0	0.752	0.996	0.9	0.904	0.999
ORC2	ORC3	9606.ENSP00000234296	9606.ENSP00000257789	0	0	0	0	0.389	0.998	0.9	0.989	0.999
ORC3	ORC6	9606.ENSP00000257789	9606.ENSP00000219097	0	0	0	0	0.229	0.978	0.9	0.916	0.999
ORC3	RPA3	9606.ENSP00000257789	9606.ENSP00000223129	0	0	0	0	0.185	0	0.9	0.069	0.917
ORC3	RPA1	9606.ENSP00000257789	9606.ENSP00000254719	0	0	0	0	0.2	0.188	0.9	0	0.929
ORC3	POLA2	9606.ENSP00000257789	9606.ENSP00000265465	0	0	0	0	0.705	0.082	0.9	0.335	0.979
ORC3	ORC5	9606.ENSP00000257789	9606.ENSP00000297431	0	0	0	0	0.573	0.996	0.9	0.936	0.999
ORC5	ORC6	9606.ENSP00000297431	9606.ENSP00000219097	0	0	0	0	0.355	0.971	0.9	0.924	0.999
ORC5	RPA3	9606.ENSP00000297431	9606.ENSP00000223129	0	0	0	0	0.099	0	0.9	0.072	0.909
ORC5	RPA1	9606.ENSP00000297431	9606.ENSP00000254719	0	0	0	0	0.194	0	0.9	0.162	0.926
ORC5	POLA2	9606.ENSP00000297431	9606.ENSP00000265465	0	0	0	0	0.718	0	0.9	0.168	0.974
ORC6	POLA2	9606.ENSP00000219097	9606.ENSP00000265465	0	0	0	0	0.454	0	0.9	0.369	0.962
ORC6	RPA3	9606.ENSP00000219097	9606.ENSP00000223129	0	0	0	0	0.509	0	0.9	0.72	0.985
ORC6	RPA1	9606.ENSP00000219097	9606.ENSP00000254719	0	0	0	0	0.203	0.948	0.9	0.151	0.996
PBK	TP53	9606.ENSP00000428489	9606.ENSP00000269305	0	0	0	0	0.095	0.384	0	0.87	0.921
PBK	PLK1	9606.ENSP00000428489	9606.ENSP00000300093	0	0	0	0	0.964	0	0	0.351	0.976
PBK	TPX2	9606.ENSP00000428489	9606.ENSP00000300403	0	0	0	0	0.927	0.063	0	0.354	0.952
PBK	RACGAP1	9606.ENSP00000428489	9606.ENSP00000404190	0	0	0	0	0.898	0.064	0	0.188	0.916
PHGDH	PSAT1	9606.ENSP00000358417	9606.ENSP00000365773	0.185	0	0	0	0.95	0.413	0.9	0.916	0.999
PLAGL1	TP53	9606.ENSP00000353734	9606.ENSP00000269305	0	0	0	0	0	0.388	0.9	0.559	0.97
PLAT	SERPINE1	9606.ENSP00000220809	9606.ENSP00000223095	0	0	0	0	0.148	0.881	0.9	0.956	0.999
PLAUR	SERPINE1	9606.ENSP00000339328	9606.ENSP00000223095	0	0	0	0	0.161	0	0.9	0.895	0.99
PLAUR	TMEM63A	9606.ENSP00000339328	9606.ENSP00000355800	0	0	0	0	0.057	0	0.9	0	0.901
PLAUR	TNFRSF1B	9606.ENSP00000339328	9606.ENSP00000365435	0	0	0	0	0.108	0	0.9	0.172	0.919
PLK1	SKP1	9606.ENSP00000300093	9606.ENSP00000231487	0	0	0	0	0.055	0.132	0.9	0.515	0.954
PLK1	TP53	9606.ENSP00000300093	9606.ENSP00000269305	0	0	0	0	0.095	0.379	0	0.873	0.922
PLK1	PLK4	9606.ENSP00000300093	9606.ENSP00000270861	0	0	0	0.707	0.441	0.184	0.9	0.887	0.963
PLK1	SPC25	9606.ENSP00000300093	9606.ENSP00000282074	0	0	0	0	0.452	0	0.9	0.162	0.95
PLK1	SGOL2	9606.ENSP00000300093	9606.ENSP00000350447	0	0	0	0	0.605	0	0.9	0.495	0.978
PLK1	RACGAP1	9606.ENSP00000300093	9606.ENSP00000404190	0	0	0	0	0.886	0.472	0	0.899	0.993
PLK1	TPX2	9606.ENSP00000300093	9606.ENSP00000300403	0	0	0	0	0.869	0	0.9	0.711	0.995
PLK4	TPX2	9606.ENSP00000270861	9606.ENSP00000300403	0	0	0	0	0.771	0	0.9	0.305	0.982
POLA2	RPA3	9606.ENSP00000265465	9606.ENSP00000223129	0	0	0	0	0.461	0	0.9	0.258	0.956
POLA2	RPA1	9606.ENSP00000265465	9606.ENSP00000254719	0	0	0	0	0.731	0.167	0.9	0.46	0.986
POLA2	RB1	9606.ENSP00000265465	9606.ENSP00000267163	0	0	0	0	0.198	0	0.9	0	0.916
POLH	RPA3	9606.ENSP00000361310	9606.ENSP00000223129	0	0	0	0	0	0	0.9	0.116	0.907
POLH	RPA1	9606.ENSP00000361310	9606.ENSP00000254719	0	0	0	0	0.089	0	0.9	0.063	0.907
POLH	WRN	9606.ENSP00000361310	9606.ENSP00000298139	0.052	0	0	0	0.077	0	0.9	0.387	0.939
POLH	RMI2	9606.ENSP00000361310	9606.ENSP00000310356	0	0	0	0	0	0	0.9	0.086	0.904
PRDM1	TP53	9606.ENSP00000358092	9606.ENSP00000269305	0	0	0	0	0	0	0.9	0.643	0.962
PXN	TRIP6	9606.ENSP00000267257	9606.ENSP00000200457	0	0	0	0.594	0.085	0.343	0.9	0.62	0.95
PXN	VCL	9606.ENSP00000267257	9606.ENSP00000211998	0	0	0	0	0.097	0.927	0.9	0.979	0.999
PXN	TNC	9606.ENSP00000267257	9606.ENSP00000265131	0	0	0	0	0	0	0.9	0.066	0.902
PXN	TLN1	9606.ENSP00000267257	9606.ENSP00000316029	0	0	0	0	0.087	0.379	0.9	0.764	0.984
RAB32	RAB34	9606.ENSP00000356465	9606.ENSP00000413156	0	0	0.379	0.704	0.098	0	0.9	0.643	0.931
RACGAP1	TPX2	9606.ENSP00000404190	9606.ENSP00000300403	0	0	0	0	0.867	0	0	0.354	0.91
RB1	SKP2	9606.ENSP00000267163	9606.ENSP00000274255	0	0	0	0	0.063	0.327	0.9	0.448	0.96
RB1	TP53	9606.ENSP00000267163	9606.ENSP00000269305	0	0	0	0	0.061	0.379	0.9	0.789	0.986
RBX1	RPA1	9606.ENSP00000216225	9606.ENSP00000254719	0	0	0	0	0.066	0	0.9	0	0.902
RBX1	TRIM4	9606.ENSP00000216225	9606.ENSP00000348216	0	0	0	0	0.056	0	0.9	0.067	0.904
RBX1	RPA3	9606.ENSP00000216225	9606.ENSP00000223129	0	0	0	0	0.226	0	0.9	0.076	0.922
RBX1	UBE2S	9606.ENSP00000216225	9606.ENSP00000264552	0	0	0	0	0.058	0.262	0.9	0.578	0.966
RBX1	SKP2	9606.ENSP00000216225	9606.ENSP00000274255	0	0	0	0	0.061	0.964	0.9	0.81	0.999
RBX1	SKP1	9606.ENSP00000216225	9606.ENSP00000231487	0	0	0	0	0.229	0.973	0.9	0.946	0.999
RMI2	RPA3	9606.ENSP00000310356	9606.ENSP00000223129	0	0	0	0	0.149	0	0.9	0.211	0.927
RMI2	RPA1	9606.ENSP00000310356	9606.ENSP00000254719	0	0	0	0	0.095	0	0.9	0.421	0.943
RMI2	TIPIN	9606.ENSP00000310356	9606.ENSP00000261881	0	0	0	0	0.147	0	0.9	0.115	0.917
RMI2	TP53	9606.ENSP00000310356	9606.ENSP00000269305	0	0	0	0	0.069	0	0.9	0.133	0.912
RMI2	WRN	9606.ENSP00000310356	9606.ENSP00000298139	0	0	0	0	0.065	0	0.9	0.598	0.959
RMI2	TIMELESS	9606.ENSP00000310356	9606.ENSP00000450607	0	0	0	0	0.332	0	0.9	0.07	0.932
RPA1	RPA3	9606.ENSP00000254719	9606.ENSP00000223129	0	0	0	0	0.288	0.998	0.9	0.848	0.999
RPA1	TP53	9606.ENSP00000254719	9606.ENSP00000269305	0	0	0	0	0.057	0.87	0.9	0.637	0.994
RPA1	TIMELESS	9606.ENSP00000254719	9606.ENSP00000450607	0	0	0	0	0.183	0.994	0.9	0.496	0.999
RPA1	TIPIN	9606.ENSP00000254719	9606.ENSP00000261881	0	0	0	0	0.265	0.994	0.9	0.439	0.999
RPA1	WRN	9606.ENSP00000254719	9606.ENSP00000298139	0	0	0	0	0.114	0.996	0.9	0.607	0.999
RPA3	TP53	9606.ENSP00000223129	9606.ENSP00000269305	0	0	0	0	0.061	0	0.9	0.593	0.958
RPA3	TIMELESS	9606.ENSP00000223129	9606.ENSP00000450607	0	0	0	0	0.084	0.993	0.9	0.191	0.999
RPA3	TIPIN	9606.ENSP00000223129	9606.ENSP00000261881	0	0	0	0	0.298	0.993	0.9	0.301	0.999
RPA3	WRN	9606.ENSP00000223129	9606.ENSP00000298139	0	0	0	0	0.06	0.993	0.9	0.4	0.999
RPL22L1	RPL39L	9606.ENSP00000346080	9606.ENSP00000296277	0	0	0	0	0.651	0.732	0.9	0.708	0.996
RUNX1	THBS1	9606.ENSP00000300305	9606.ENSP00000260356	0	0	0	0	0.076	0	0.9	0	0.903
RUNX1	RUNX3	9606.ENSP00000300305	9606.ENSP00000382800	0	0	0	0.956	0.065	0	0.9	0.655	0.905
RUNX3	TP53	9606.ENSP00000382800	9606.ENSP00000269305	0	0	0	0	0	0	0.9	0.746	0.973
RUNX3	TCF7L1	9606.ENSP00000382800	9606.ENSP00000282111	0	0	0	0	0	0	0.9	0.104	0.906
RUNX3	TEAD4	9606.ENSP00000382800	9606.ENSP00000352926	0	0	0	0	0	0	0.9	0.462	0.943
RUNX3	SPP1	9606.ENSP00000382800	9606.ENSP00000378517	0	0	0	0	0	0	0.9	0.547	0.952
SEMA5B	THBS1	9606.ENSP00000389588	9606.ENSP00000260356	0	0	0	0.554	0	0	0.9	0.213	0.907
SEMA5B	THSD4	9606.ENSP00000389588	9606.ENSP00000347484	0	0	0	0.541	0	0	0.9	0	0.9
SERPINE1	TGIF2	9606.ENSP00000223095	9606.ENSP00000362981	0	0	0	0	0	0	0.9	0.064	0.902
SERPINE1	TGIF1	9606.ENSP00000223095	9606.ENSP00000327959	0	0	0	0	0.066	0	0.9	0.129	0.911
SERPINE1	VEGFB	9606.ENSP00000223095	9606.ENSP00000311127	0	0	0	0	0	0	0.9	0.228	0.919
SERPINE1	THBS1	9606.ENSP00000223095	9606.ENSP00000260356	0	0	0	0	0.273	0	0.9	0.616	0.969
SGOL2	SPC25	9606.ENSP00000350447	9606.ENSP00000282074	0	0	0	0	0.336	0	0.9	0.243	0.945
SKP1	TRIM4	9606.ENSP00000231487	9606.ENSP00000348216	0	0	0	0	0.083	0	0.9	0.041	0.904
SKP1	UBE2S	9606.ENSP00000231487	9606.ENSP00000264552	0	0	0	0	0	0.261	0.9	0.697	0.975
SKP1	SKP2	9606.ENSP00000231487	9606.ENSP00000274255	0	0	0	0	0.061	0.971	0.9	0.864	0.999
SKP2	UBE2S	9606.ENSP00000274255	9606.ENSP00000264552	0	0	0	0	0.077	0	0.9	0.564	0.956
SKP2	TP53	9606.ENSP00000274255	9606.ENSP00000269305	0	0	0	0	0.061	0.255	0.9	0.646	0.971
SKP2	TRIM4	9606.ENSP00000274255	9606.ENSP00000348216	0	0	0	0	0	0	0.9	0	0.9
SPARCL1	TNC	9606.ENSP00000414856	9606.ENSP00000265131	0	0	0	0	0.064	0	0.9	0.079	0.906
SPARCL1	SPP1	9606.ENSP00000414856	9606.ENSP00000378517	0	0	0	0	0.11	0	0.9	0.597	0.961
SPP1	TNC	9606.ENSP00000378517	9606.ENSP00000265131	0	0	0	0	0.072	0	0.9	0.087	0.907
SYNJ2	TRIP10	9606.ENSP00000347792	9606.ENSP00000320117	0	0	0	0	0.049	0.191	0.9	0.252	0.934
TFAP2A	TFAP2B	9606.ENSP00000368924	9606.ENSP00000377265	0	0	0	0.971	0.235	0.379	0.9	0.75	0.949
TFAP2B	TGFBR2	9606.ENSP00000377265	9606.ENSP00000351905	0	0	0	0	0	0	0.9	0.168	0.913
TGFB1I1	VCL	9606.ENSP00000378332	9606.ENSP00000211998	0	0	0	0	0.086	0.548	0	0.779	0.901
THBS1	THSD4	9606.ENSP00000260356	9606.ENSP00000347484	0	0	0	0	0.088	0	0.9	0.16	0.916
THBS1	VEGFB	9606.ENSP00000260356	9606.ENSP00000311127	0	0	0	0	0	0	0.9	0.329	0.93
TIMELESS	TIPIN	9606.ENSP00000450607	9606.ENSP00000261881	0	0	0	0	0.21	0.96	0.9	0.935	0.999
TIMELESS	WRN	9606.ENSP00000450607	9606.ENSP00000298139	0	0	0	0	0.103	0.261	0.9	0.63	0.972
TIMP2	VCL	9606.ENSP00000262768	9606.ENSP00000211998	0	0	0	0	0	0	0.9	0.172	0.913
TIMP3	TP53	9606.ENSP00000266085	9606.ENSP00000269305	0	0	0	0	0	0	0.9	0.708	0.969
TIPIN	WRN	9606.ENSP00000261881	9606.ENSP00000298139	0	0	0	0	0.188	0.407	0.9	0.499	0.972
TLN1	VCL	9606.ENSP00000316029	9606.ENSP00000211998	0	0	0	0	0.144	0.974	0.9	0.855	0.999
TLN1	ZC3HAV1	9606.ENSP00000316029	9606.ENSP00000242351	0	0	0	0	0	0	0.9	0	0.9
TMEM63A	TNFRSF1B	9606.ENSP00000355800	9606.ENSP00000365435	0	0	0	0	0.059	0	0.9	0	0.901
TNFRSF10A	TNFRSF10B	9606.ENSP00000221132	9606.ENSP00000276431	0	0	0	0.927	0.069	0.522	0.9	0.923	0.954
TNFRSF10A	TP53	9606.ENSP00000221132	9606.ENSP00000269305	0	0	0	0	0.061	0	0.9	0.818	0.981
TNFRSF10A	TNFSF10	9606.ENSP00000221132	9606.ENSP00000241261	0	0	0	0	0	0.993	0.9	0.883	0.999
TNFRSF10B	TNFSF10	9606.ENSP00000276431	9606.ENSP00000241261	0	0	0	0	0	0.993	0.9	0.883	0.999
TNFRSF10B	TP53	9606.ENSP00000276431	9606.ENSP00000269305	0	0	0	0	0.079	0	0.9	0.855	0.985
TNFRSF12A	TNFRSF1B	9606.ENSP00000326737	9606.ENSP00000365435	0	0	0	0	0	0	0.9	0.423	0.939
TNFRSF1A	TNFRSF1B	9606.ENSP00000162749	9606.ENSP00000365435	0	0	0	0	0.063	0.336	0.9	0.923	0.994
TP53	TPX2	9606.ENSP00000269305	9606.ENSP00000300403	0	0	0	0	0.096	0	0.9	0.334	0.934
TP53	WRN	9606.ENSP00000269305	9606.ENSP00000298139	0	0	0	0	0	0.384	0.9	0.797	0.986
TRIM4	UBE2S	9606.ENSP00000348216	9606.ENSP00000264552	0	0	0	0	0	0.084	0.9	0.045	0.904
VCL	ZC3HAV1	9606.ENSP00000211998	9606.ENSP00000242351	0	0	0	0	0	0	0.9	0	0.9
Table S5. List of nodes from protein–protein interaction network analysis of common differentially expressed genes C9 versus C9-GC and C9 versus C9-KO with 100 additional known interactors enabled. Refers to Fig 4F.
